# Supplementary material for: Narrow bandgap covalent–organic frameworks with strong optical response in the visible and infrared
Source: Royal Society of Chemistry journal article supplement (doi:10.1039/c4tc02559h), 2015-01-01
Supplement: c4tc02559h1.pdf [file c4tc02559h1.pdf]

# Narrow Bandgap Covalent Organic Frameworks with Strong Optical Response in the Visible and Infrared

## Supporting Information

Li-Ming Yang\*<sup>1</sup>, Eric Ganz<sup>2</sup>, Song Wang,<sup>3</sup> Xiao-Jun Li,<sup>4</sup> and Thomas Frauenheim<sup>1</sup>

<sup>1</sup>Bremen Center for Computational Materials Science, University of Bremen, Am Falturm 1, 28359, Bremen, Germany; <sup>2</sup>Department of Physics, University of Minnesota, 116 Church St., SE, Minneapolis, Minnesota 55416, USA; <sup>3</sup>State Key Laboratory of Theoretical and Computational Chemistry, Institute of Theoretical Chemistry, Jilin University, Changchun 130023, People's Republic of China. <sup>4</sup>School of Chemistry and Chemical Engineering, Xi'an University, Xi'an 710065, Shaanxi Province, P.R. China (email: [lmyang.uio@gmail.com](mailto:lmyang.uio@gmail.com))

Page 2, **Table S1**. The optimized equilibrium lattice constants, bulk moduli, and its pressure derivatives.  
Page 3, **Fig. S1**. The calculated electronic band structure of (C, Si).  
Page 4, **Fig. S2**. The calculated electronic band structure of (C, Ge).  
Page 5, **Fig. S3**. The calculated electronic band structure of (C, Sn).  
Page 6, **Fig. S4**. The calculated electronic band structure of (C, Pb).  
Page 7, **Fig. S5**. The calculated electronic band structure of (Si, C).  
Page 8, **Fig. S6**. The calculated electronic band structure of (Si, Si).  
Page 9, **Fig. S7**. The calculated electronic band structure of (Si, Ge).  
Page 10, **Fig. S8**. The calculated electronic band structure of (Si, Sn).  
Page 11, **Fig. S9**. The calculated electronic band structure of (Si, Pb).  
Page 12, **Table S2**. The estimated band gaps and corresponding wavelengths of absorption lights for the whole (X, Y) series.  
Page 13, **Fig. S10**. The calculated TDOS and PDOS for (C, Si)  
Page 14, **Fig. S11**. The calculated TDOS and PDOS for (C, Ge)  
Page 15, **Fig. S12**. The calculated TDOS and PDOS for (C, Sn)  
Page 16, **Fig. S13**. The calculated TDOS and PDOS for (C, Pb)  
Page 17, **Fig. S14**. The calculated TDOS and PDOS for (Si, C)  
Page 18, **Fig. S15**. The calculated TDOS and PDOS for (Si, Si)  
Page 19, **Fig. S16**. The calculated TDOS and PDOS for (Si, Ge)  
Page 20, **Fig. S17**. The calculated TDOS and PDOS for (Si, Sn)  
Page 21, **Fig. S18**. The calculated TDOS and PDOS for (Si, Pb)  
Page 22, **Fig. S19**. The calculated charge density, charge transfer, and ELF plots for (C, Si)  
Page 23, **Fig. S20**. The calculated charge density, charge transfer, and ELF plots for (C, Ge)  
Page 24, **Fig. S21**. The calculated charge density, charge transfer, and ELF plots for (C, Sn)  
Page 25, **Fig. S22**. The calculated charge density, charge transfer, and ELF plots for (C, Pb)  
Page 26, **Fig. S23**. The calculated charge density, charge transfer, and ELF plots for (Si, C)  
Page 27, **Fig. S24**. The calculated charge density, charge transfer, and ELF plots for (Si, Si)  
Page 28, **Fig. S25**. The calculated charge density, charge transfer, and ELF plots for (Si, Ge)  
Page 29, **Fig. S26**. The calculated charge density, charge transfer, and ELF plots for (Si, Sn)  
Page 30, **Fig. S27**. The calculated charge density, charge transfer, and ELF plots for (Si, Pb)  
Page 31, **Table S3**. The calculated formation enthalpies for the whole (X, Y) series.  
Pages 32-41, **Figs. S28-S37**. The calculated optical properties for each material.  
Page 32, **Fig. S28**. The calculated optical properties for (C, C)  
Page 33, **Fig. S29**. The calculated optical properties for (C, Si)  
Page 34, **Fig. S30**. The calculated optical properties for (C, Ge)  
Page 35, **Fig. S31**. The calculated optical properties for (C, Sn)  
Page 36, **Fig. S32**. The calculated optical properties for (C, Pb)  
Page 37, **Fig. S33**. The calculated optical properties for (Si, C)  
Page 38, **Fig. S34**. The calculated optical properties for (Si, Si)  
Page 39, **Fig. S35**. The calculated optical properties for (Si, Ge)  
Page 40, **Fig. S36**. The calculated optical properties for (Si, Sn)  
Page 41, **Fig. S37**. The calculated optical properties for (Si, Pb)  
Page 42, **Table S4**. Optical constants at infinite wavelength or zero energy:  $\epsilon_1(0)$ ,  $R(0)$ ,  $n(0)$ , and the maximum peaks of imaginary part of dielectric function  $\epsilon_2(\omega)$ , extinction coefficient  $k(\omega)$ , the real part of optical conductivity  $Re(\sigma)$ , electron energy-loss function  $L(\omega)$ , absorption coefficient  $\alpha(\omega)$  for the whole (X,Y) series as well as that of MOF-5 for a comparison.  
Page 43, **Fig. S38**. The plots of optical constants.  
Page 44, **References**.

**Table S1.** Optimized equilibrium lattice constant ( $a$  (Å)), bulk modulus ( $B_0$  (GPa)), and its pressure derivative ( $B_0'$ ) for novel materials  $(X_4Y)(O_2B-C_{12}H_6-BO_2)_3$  ( $X=C/Si$ ;  $Y=C, Si, Ge, Sn, \text{ and } Pb$ ) as well as prototypical MOF-5.

| (X, Y)   | $a$ (Å)                                                         | $B_0$ (GPa) <sup>a</sup>         | $B_0'$ <sup>a</sup>           |
|----------|-----------------------------------------------------------------|----------------------------------|-------------------------------|
| (C, C)   | 24.4264                                                         | 22.62(22.64)[22.64]              | 3.64(3.66)[3.67]              |
| (C, Si)  | 24.6751                                                         | 21.75(21.77)[21.77]              | 3.73(3.74)[3.74]              |
| (C, Ge)  | 24.7173                                                         | 21.68(21.70)[21.69]              | 2.99(3.01)[2.99]              |
| (C, Sn)  | 24.8698                                                         | 21.16(21.18)[21.18]              | 3.60(3.62)[3.62]              |
| (C, Pb)  | 24.9207                                                         | 21.14(21.15)[21.15]              | 3.08(3.10)[3.11]              |
| (Si, C)  | 25.8190                                                         | 19.44(19.45)[19.44]              | 2.33(2.35)[2.35]              |
| (Si, Si) | 26.1963                                                         | 18.63(18.64)[18.64]              | 3.32(3.34)[3.33]              |
| (Si, Ge) | 26.2123                                                         | 18.55(18.56)[18.57]              | 3.63(3.65)[3.66]              |
| (Si, Sn) | 26.3780                                                         | 18.00(18.01)[18.02]              | 3.49(3.51)[3.50]              |
| (Si, Pb) | 26.4125                                                         | 17.96(17.97)[17.97]              | 3.54(3.55)[3.55]              |
| MOF-5    | $\langle 25.6690 \rangle^b \langle 25.8849 \rangle^c 26.0443^d$ | 15.37(15.37)[15.37] <sup>d</sup> | 5.06(5.13)[5.17] <sup>d</sup> |

<sup>a</sup>Data without brackets from Murnaghan EOS; data (in parentheses) from Birch-Murnaghan 3<sup>rd</sup>-order EOS; data [in brackets] from Universal EOS. <sup>b</sup> and <sup>c</sup> The lattice parameters of single crystals of as-synthesized and fully desolvated MOF-5 from ref<sup>1</sup>, respectively. <sup>d</sup>The calculated lattice parameter and bulk modulus of MOF-5 from PAW-PBE VASP calculations in ref<sup>2</sup>.

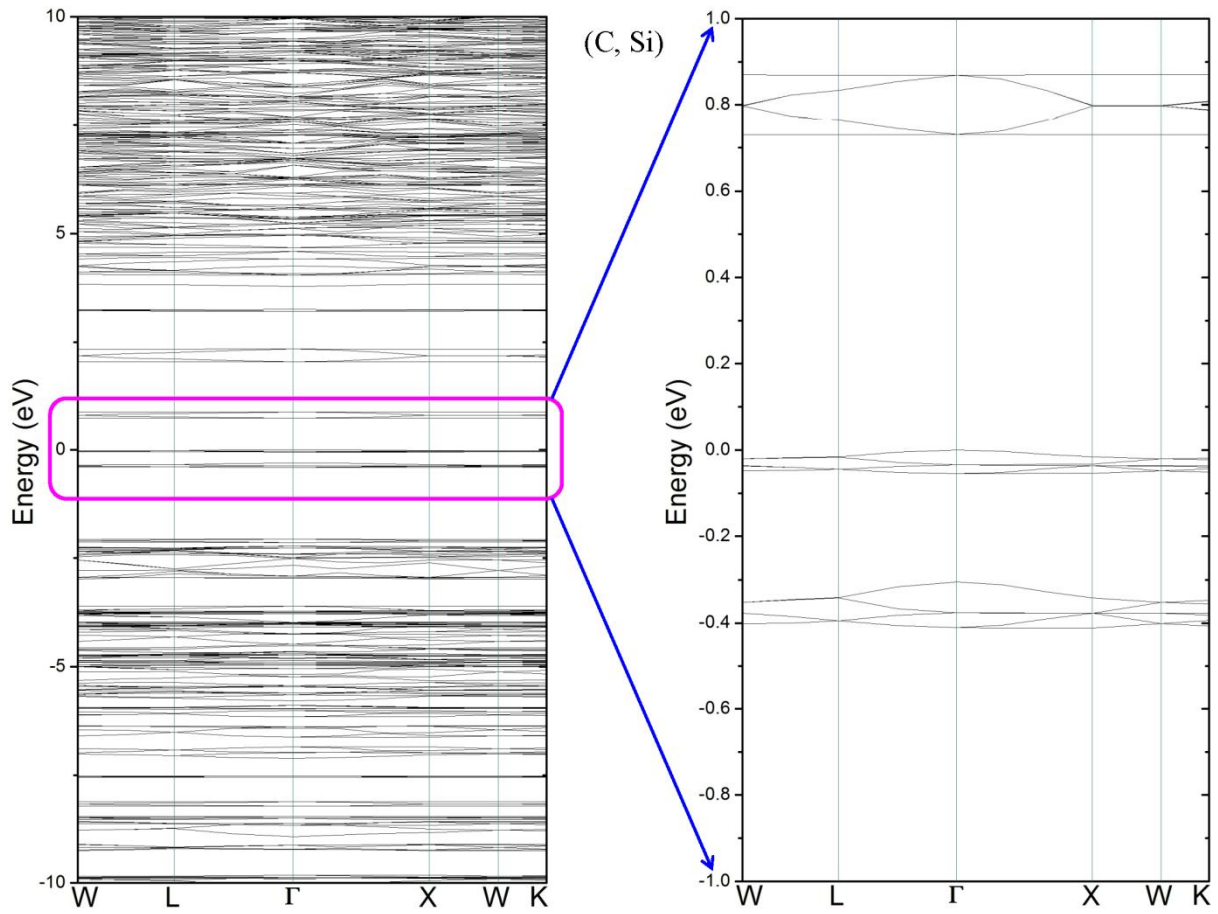

**Figure S1.** The electronic band structure of (C, Si). The Fermi level is set to zero and placed in the valence band maximum.

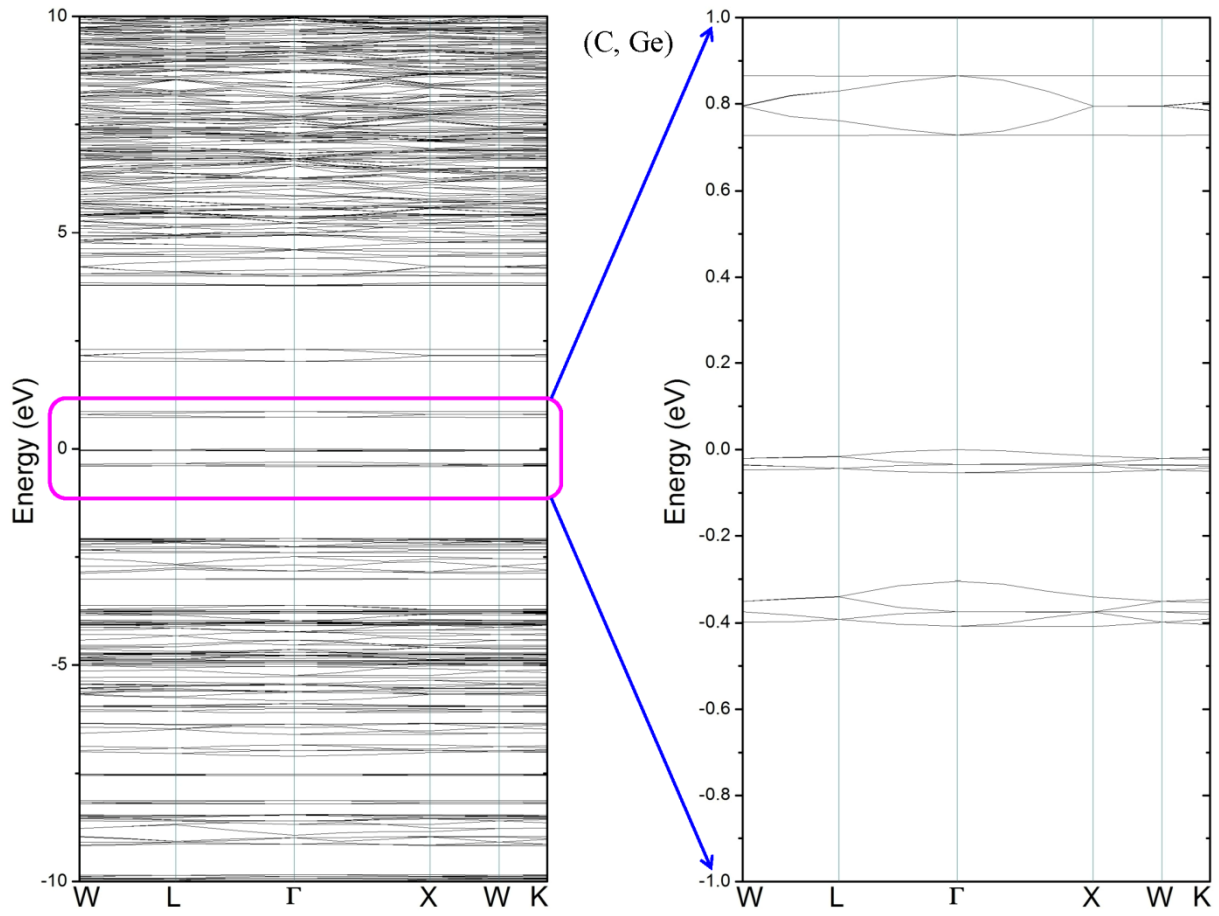

**Figure S2.** The electronic band structure of (C, Ge). The Fermi level is set to zero and placed in the valence band maximum.

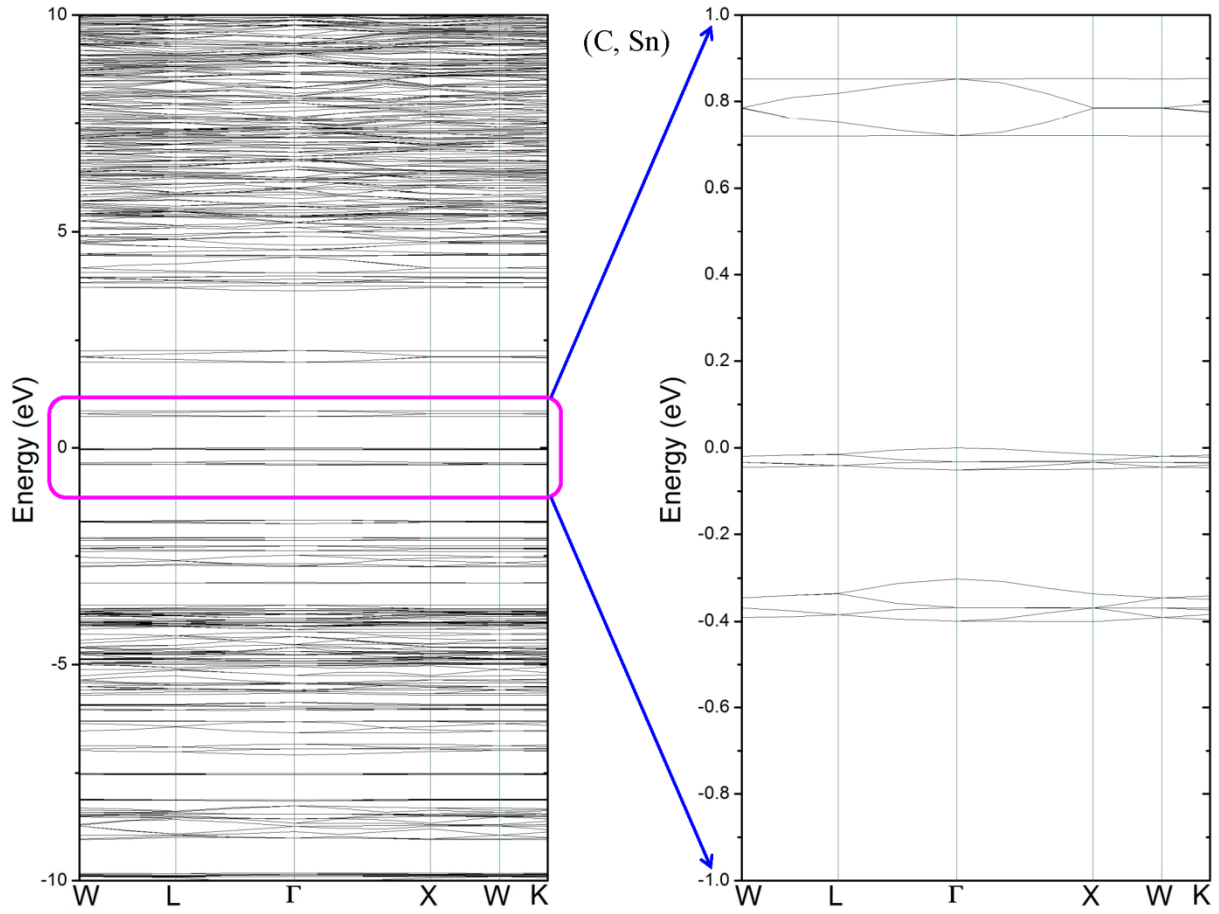

**Figure S3.** The electronic band structure of (C, Sn). The Fermi level is set to zero and placed in the valence band maximum.

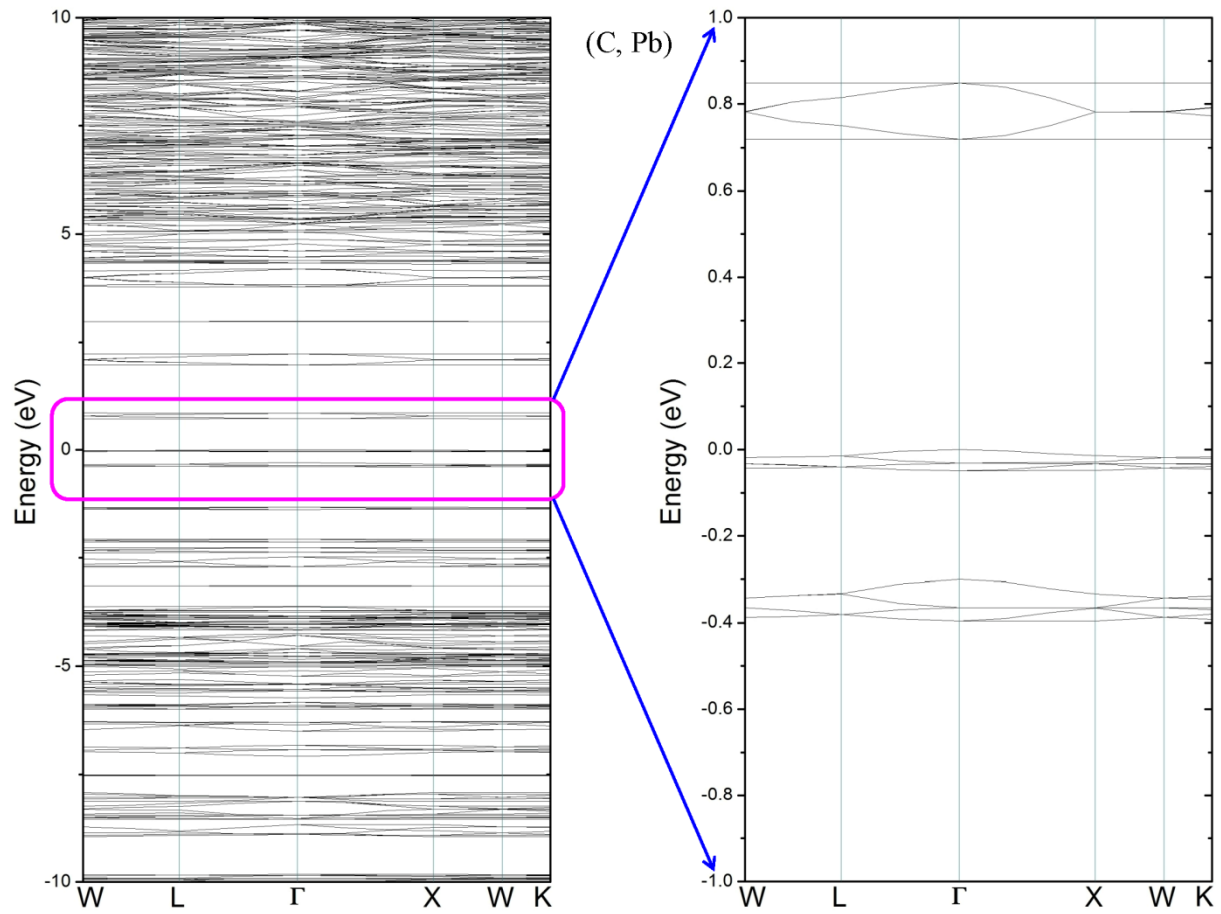

**Figure S4.** The electronic band structure of (C, Pb). The Fermi level is set to zero and placed in the valence band maximum.

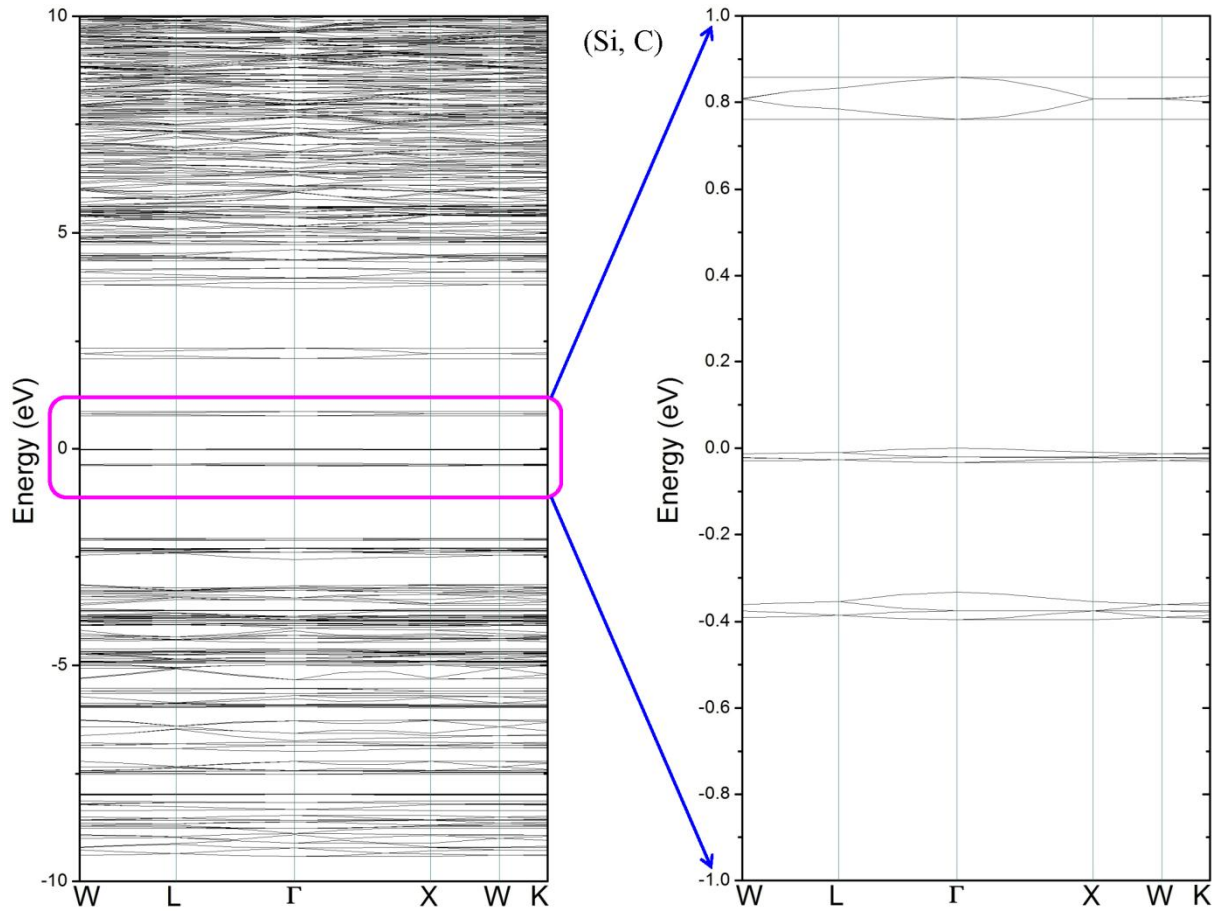

**Figure S5.** The electronic band structure of (Si, C). The Fermi level is set to zero and placed in the valence band maximum.

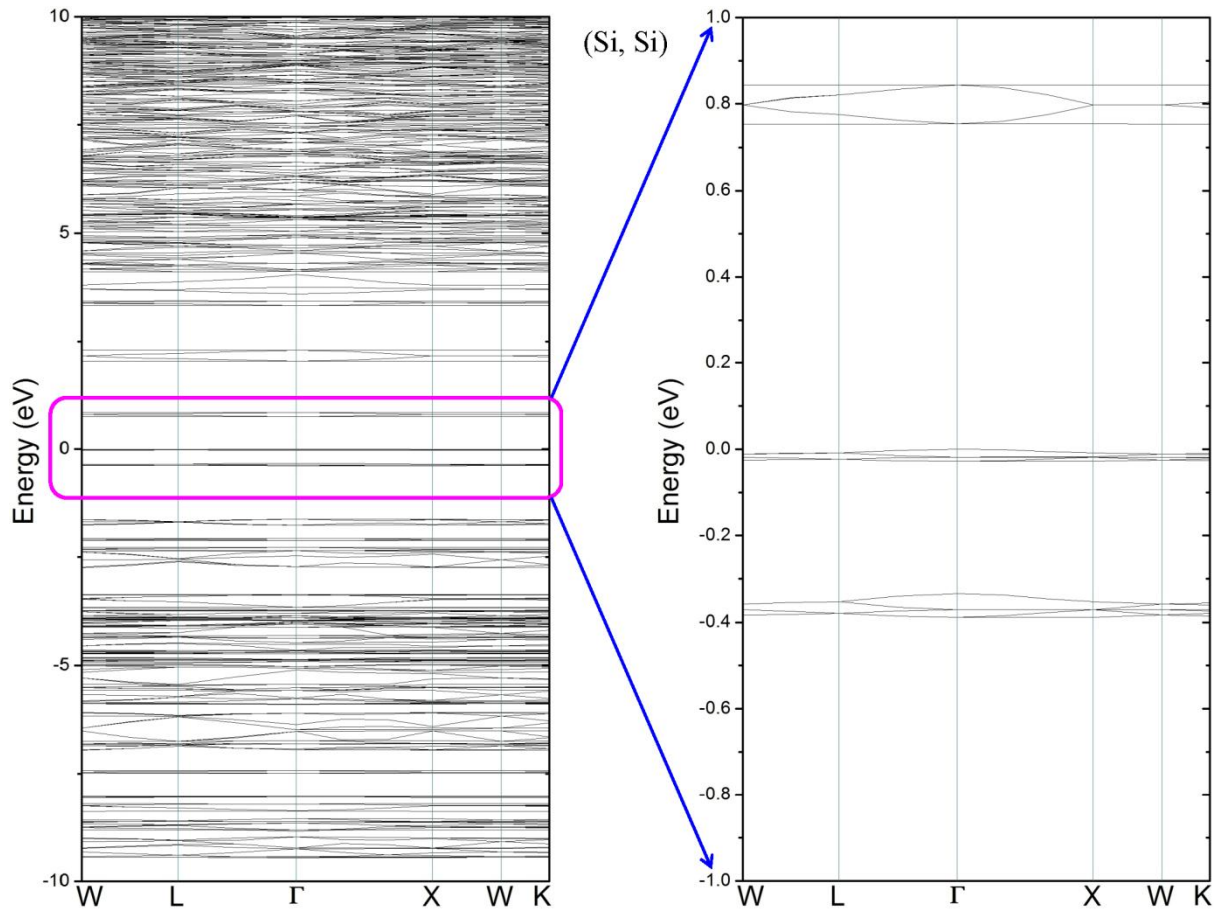

**Figure S6.** The electronic band structure of (Si, Si). The Fermi level is set to zero and placed in the valence band maximum.



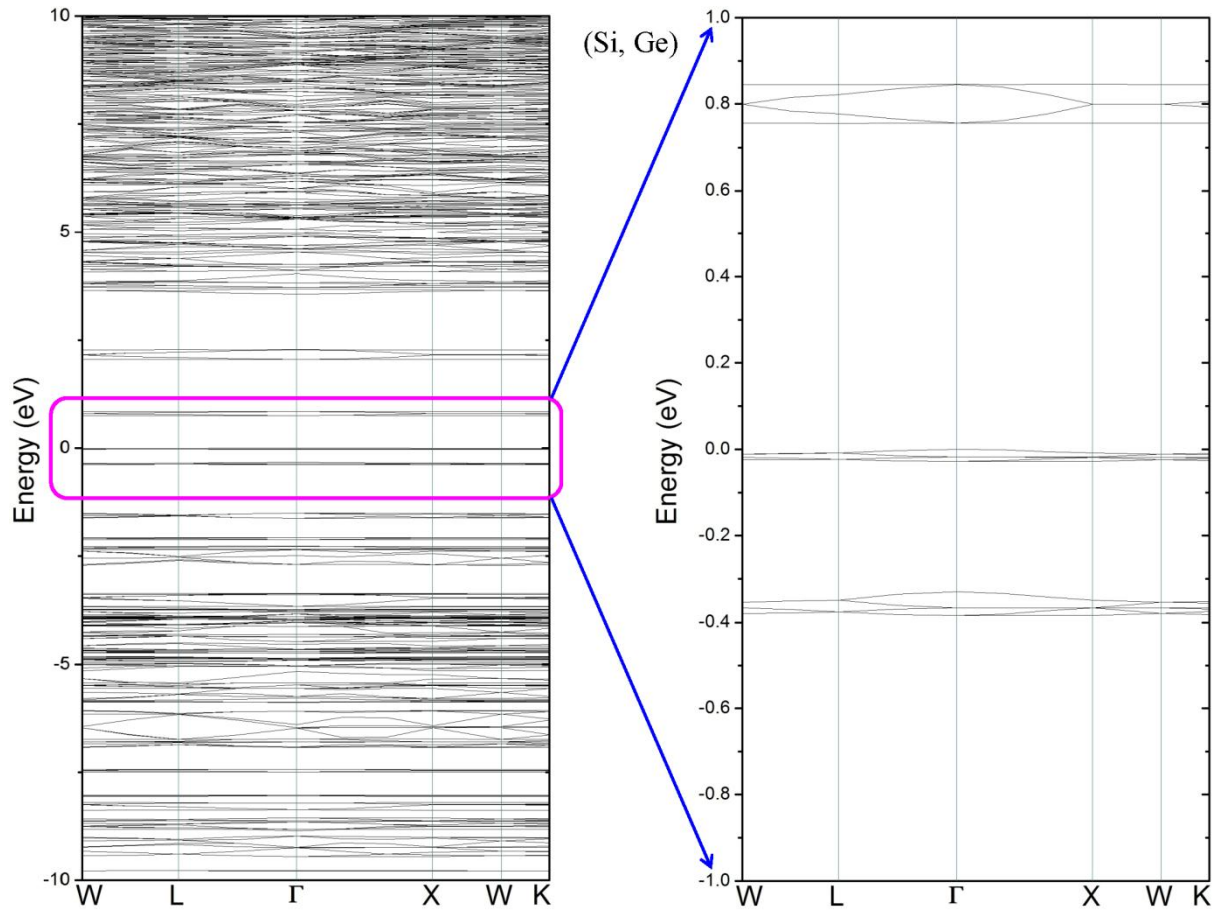

**Figure S7.** The electronic band structure of (Si, Ge). The Fermi level is set to zero and placed in the valence band maximum.

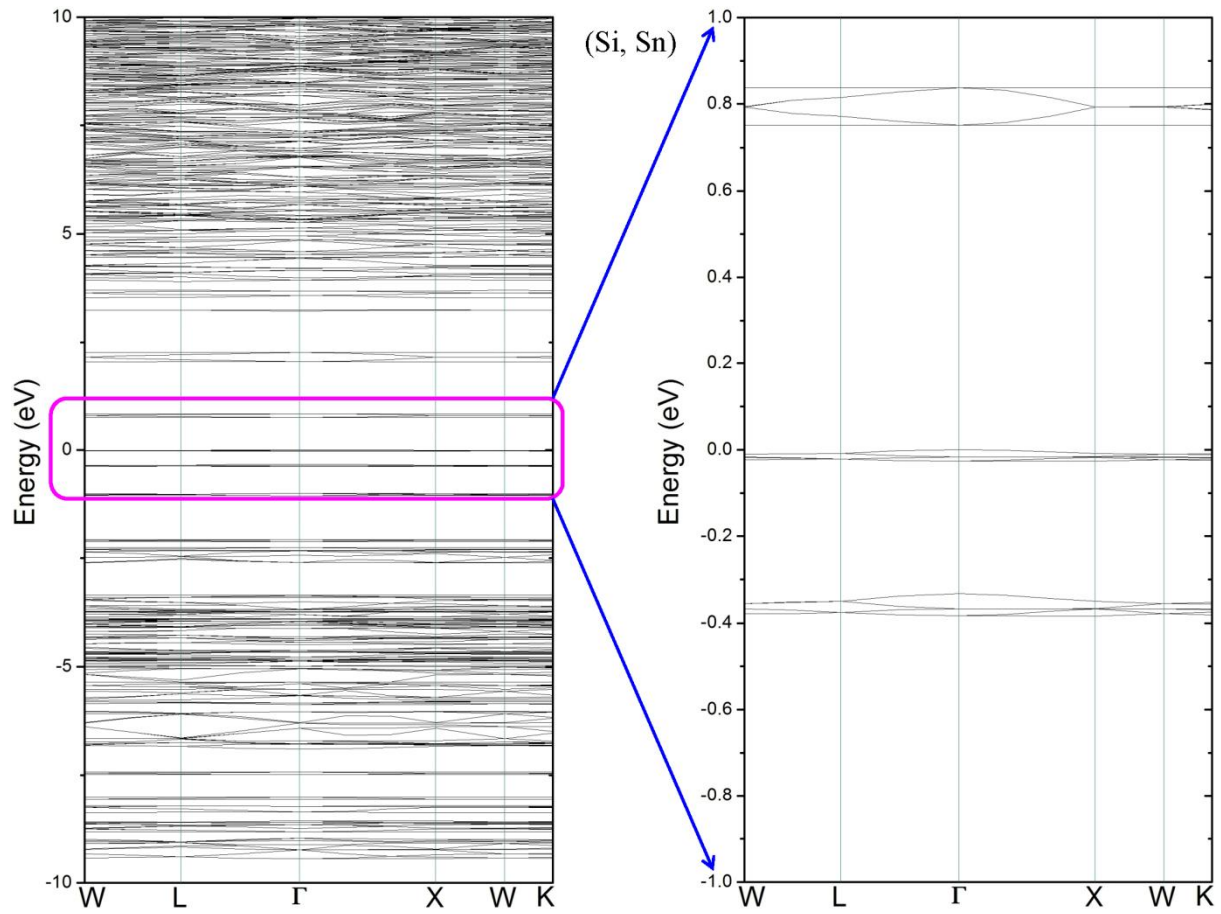

**Figure S8.** The electronic band structure of (Si, Sn). The Fermi level is set to zero and placed in the valence band maximum.

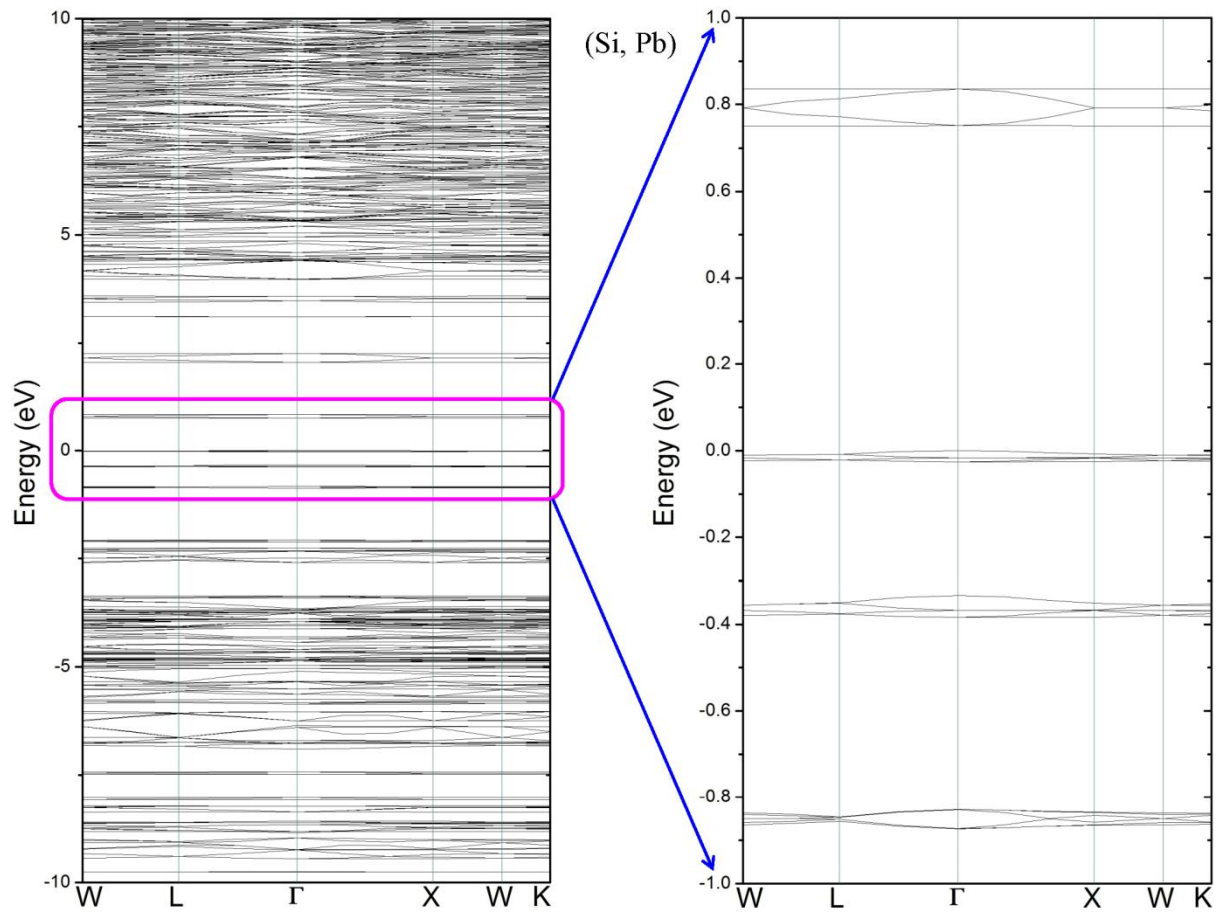

**Figure S9.** The electronic band structure of (Si, Pb). The Fermi level is set to zero and placed in the valence band maximum.

**Table S2.** Estimated band gap values (Theo.  $E_g$  (in eV)) for the novel materials  $(X_4Y)(O_2B-C_{12}H_6-BO_2)_3$  ( $X = C/Si$ ;  $Y = C, Si, Ge, Sn,$  and  $Pb$ ), experimental and theoretical band gap values (Exp.  $E_g$ ) for prototypical MOF-5, as well as the corresponding wavelength ( $\lambda$  in nm) of absorption lights. Note that  $\lambda = hc/E$  in nm;  $h$  is Planck constant (in eV·s),  $c$  is the speed of light (i.e.,  $3 \times 10^8$  m/s or  $3 \times 10^{17}$  nm/s),  $E$  is the energy (in eV), here corresponding to a certain band gap of a specific material.

| (X, Y)   | $E_g^1$              | $\lambda^1$ | $E_g^2$ | $\lambda^2$ | $E_g^3$ | $\lambda^3$ |
|----------|----------------------|-------------|---------|-------------|---------|-------------|
| (C, C)   | 0.736                | 1685.7      | 1.235   | 1005.0      | 1.375   | 902.5       |
| (C, Si)  | 0.729                | 1701.9      | 1.162   | 1068.1      | 0.886   | 1399.7      |
| (C, Ge)  | 0.727                | 1706.6      | 1.158   | 1071.1      | 1.469   | 844.6       |
| (C, Sn)  | 0.721                | 1720.8      | 1.122   | 1105.8      | 1.391   | 892.2       |
| (C, Pb)  | 0.718                | 1728.0      | 1.107   | 1120.7      | 0.754   | 1644.7      |
| (Si, C)  | 0.760                | 1632.5      | 1.224   | 1013.4      | 1.386   | 895.1       |
| (Si, Si) | 0.753                | 1647.7      | 1.189   | 1043.2      | 1.049   | 1182.6      |
| (Si, Ge) | 0.755                | 1643.3      | 1.201   | 1032.7      | 1.284   | 966.6       |
| (Si, Sn) | 0.751                | 1652.1      | 1.199   | 1034.9      | 0.967   | 1283.4      |
| (Si, Pb) | 0.750                | 1654.3      | 1.202   | 1031.9      | 0.857   | 1447.3      |
| MOF-5    | 3.558 <sup>a</sup>   | 348.7       |         |             |         |             |
| MOF-5    | 3.4-4.0 <sup>b</sup> | 364.9-310.2 |         |             |         |             |

<sup>a</sup>The theoretical band gap of MOF-5 and threshold absorption wavelength, from ref.<sup>2,3</sup>

<sup>b</sup>The experimental band gaps of MOF-5 and threshold absorption wavelength, from ref.<sup>4-6</sup>

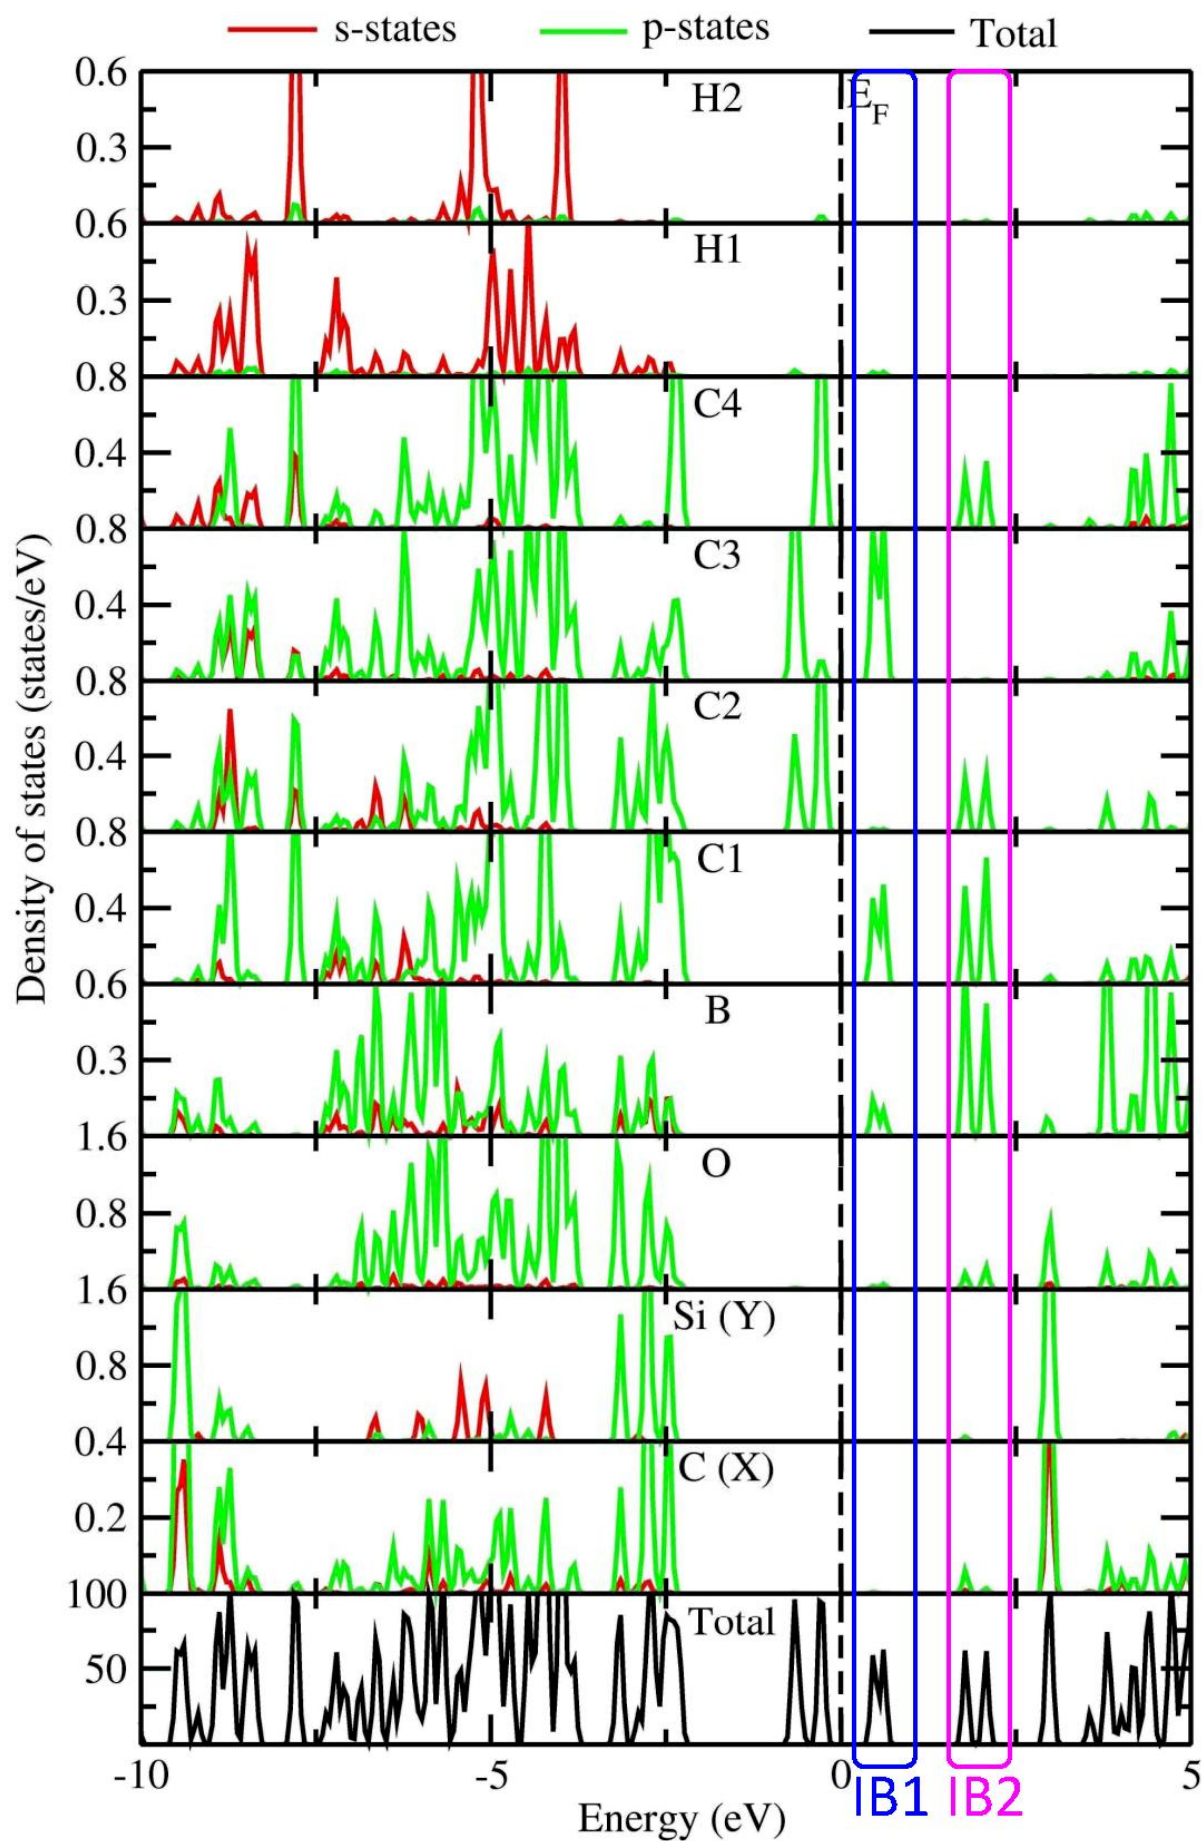

**Figure S10.** The calculated total density of states (TDOS) and partial density of states (PDOS) for (C, Si) in the cubic  $Fm-3m$  symmetry (no. 225)



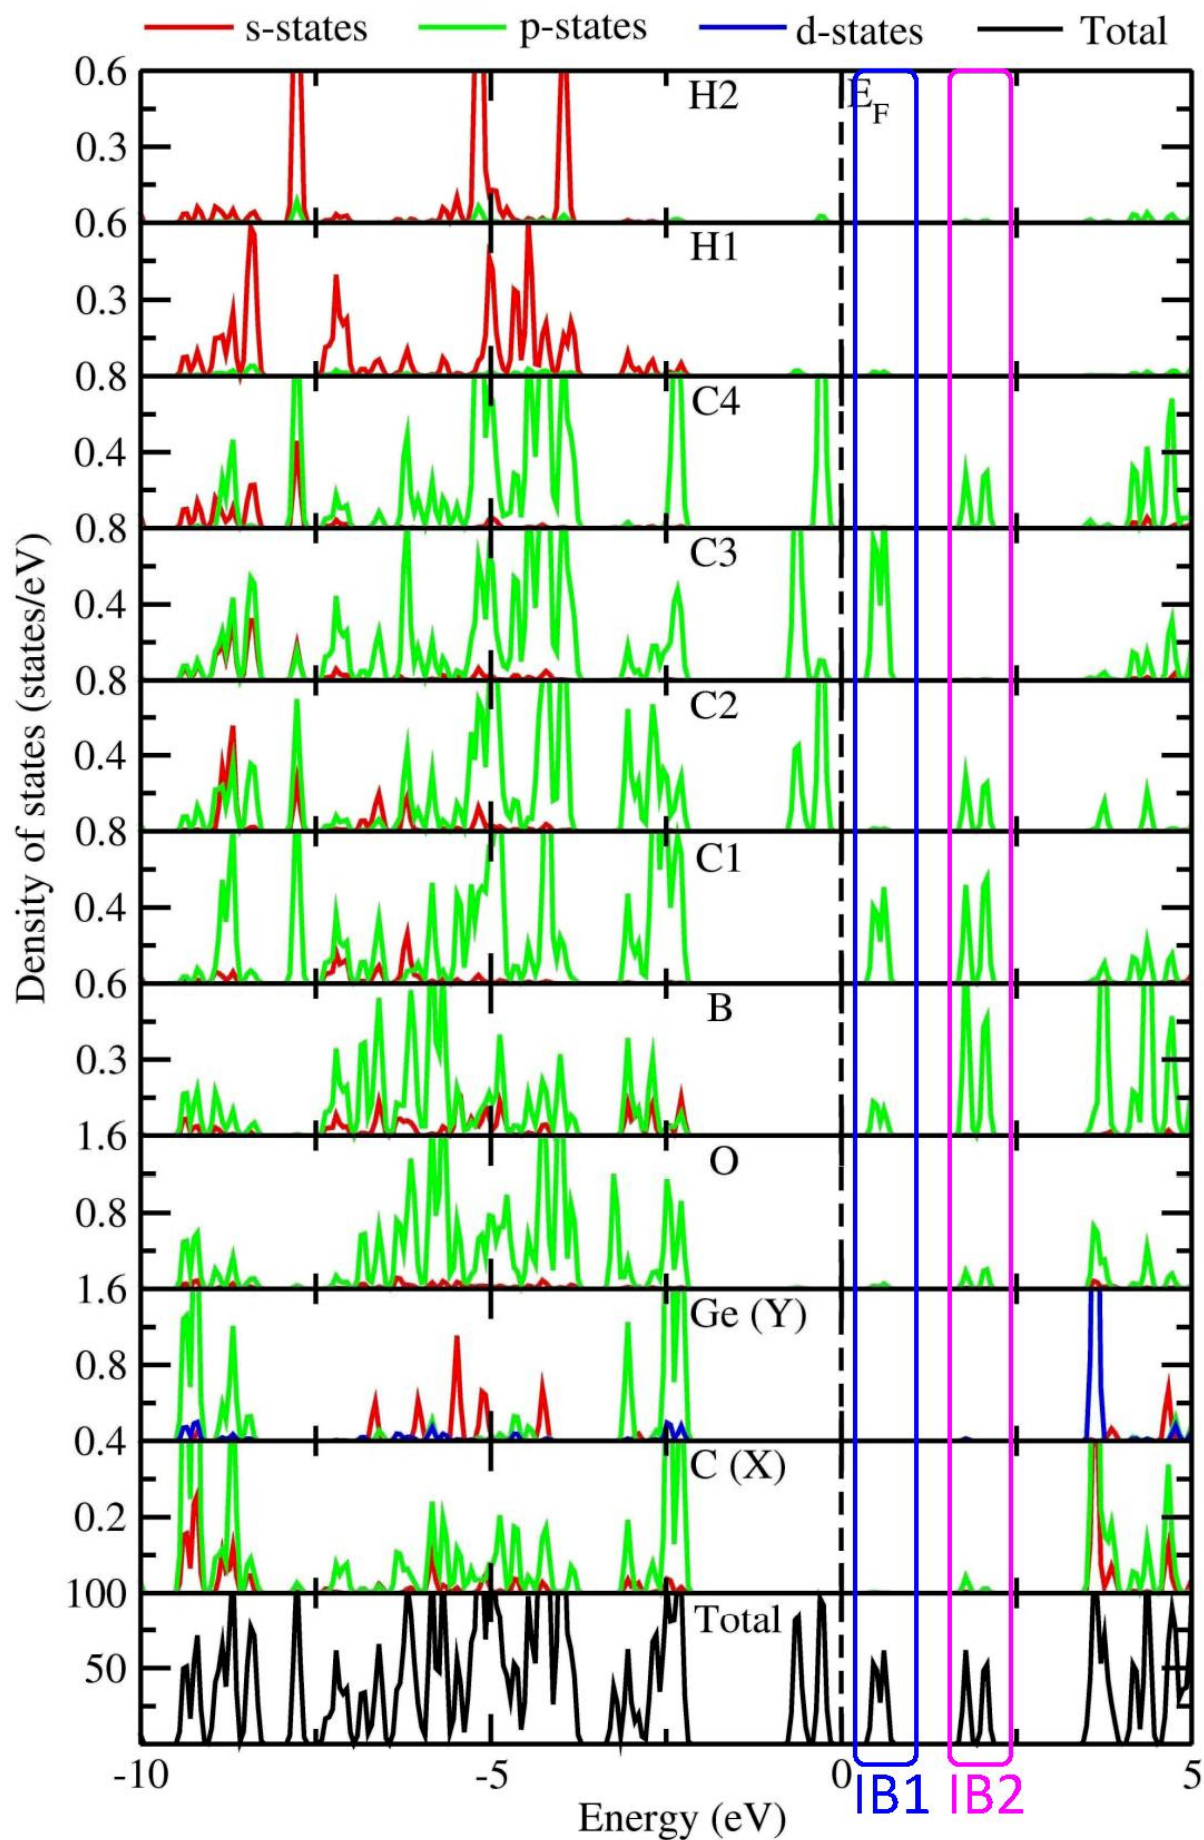

**Figure S11.** The calculated total density of states (TDOS) and partial density of states (PDOS) for (C, Ge) in the cubic  $Fm-3m$  symmetry (no. 225)

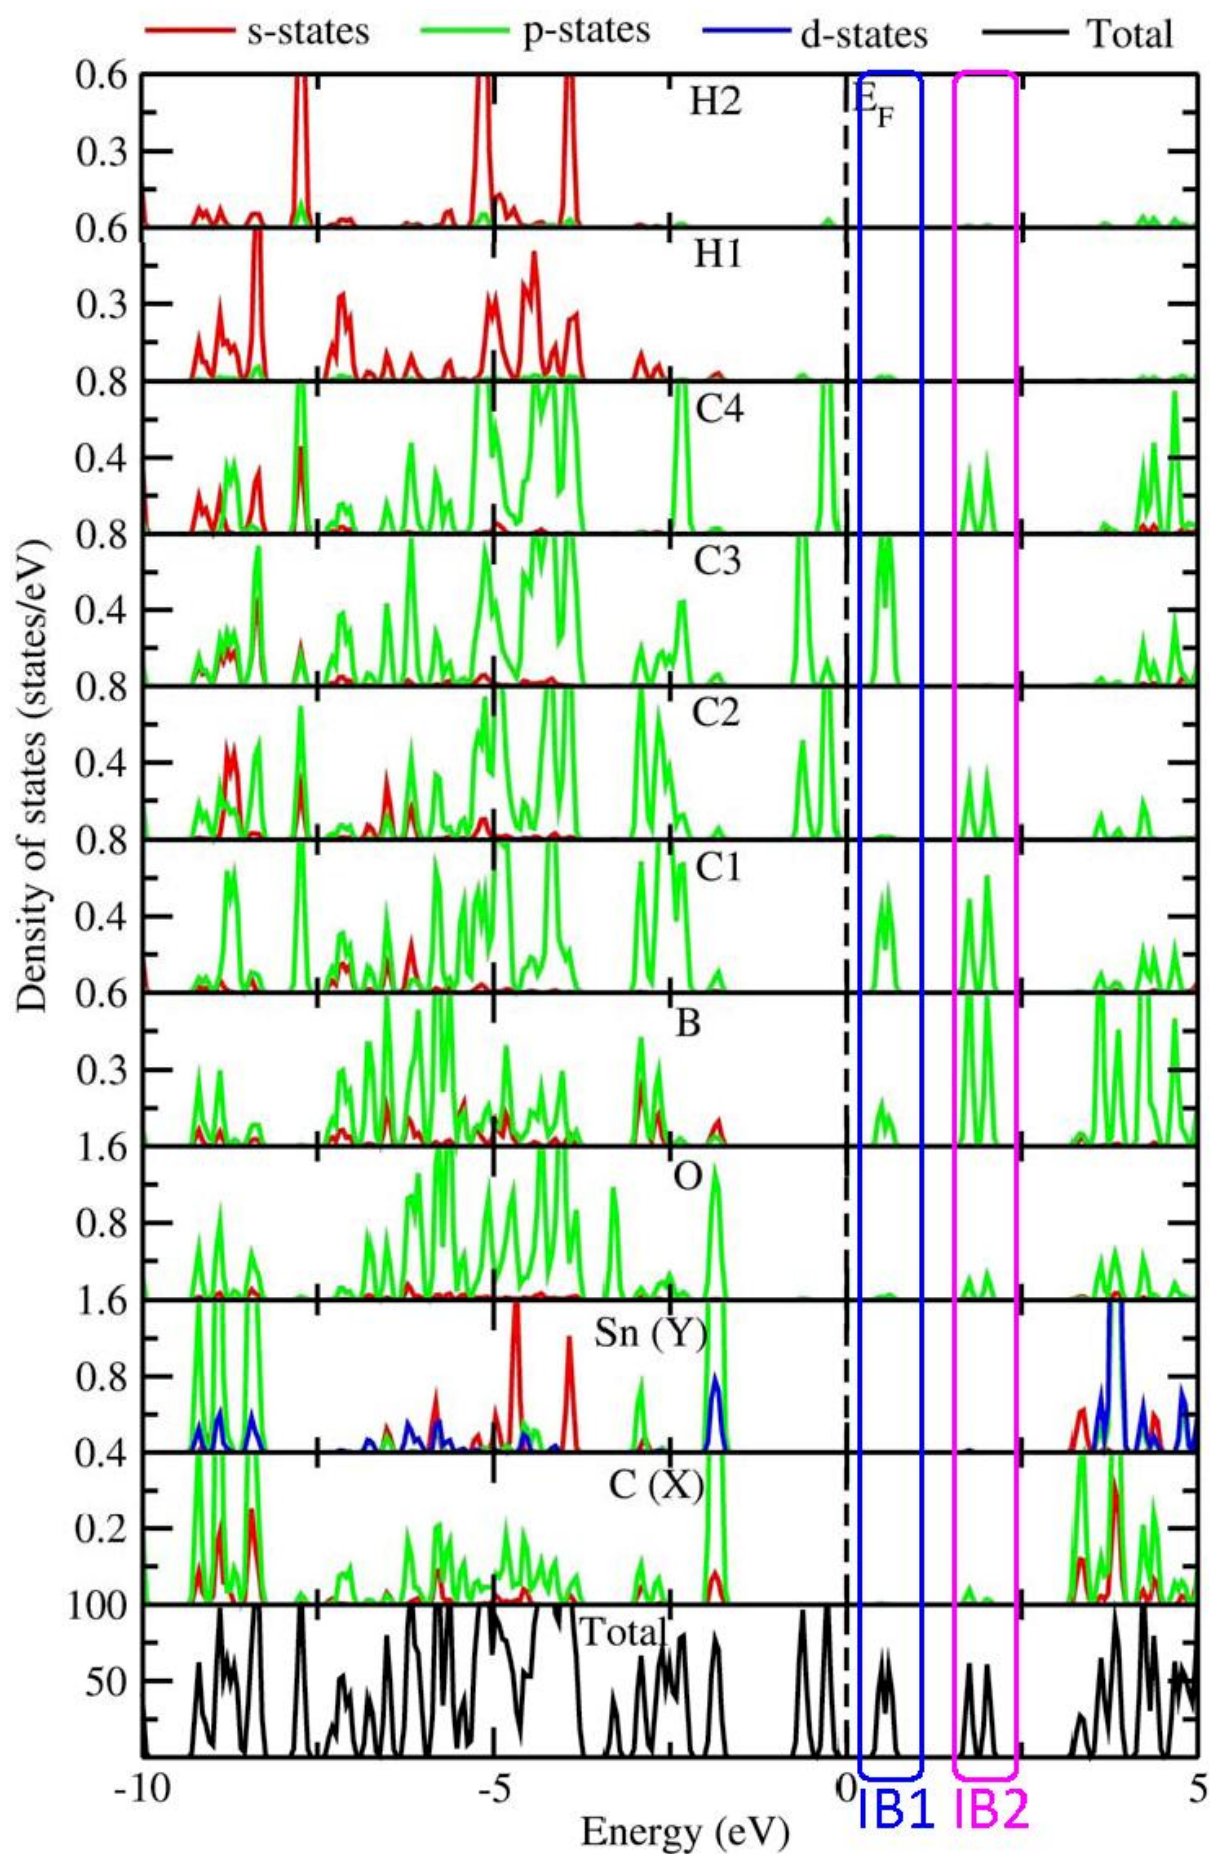

**Figure S12.** The calculated total density of states (TDOS) and partial density of states (PDOS) for (C, Sn) in the cubic  $Fm\bar{3}m$  symmetry (no. 225)



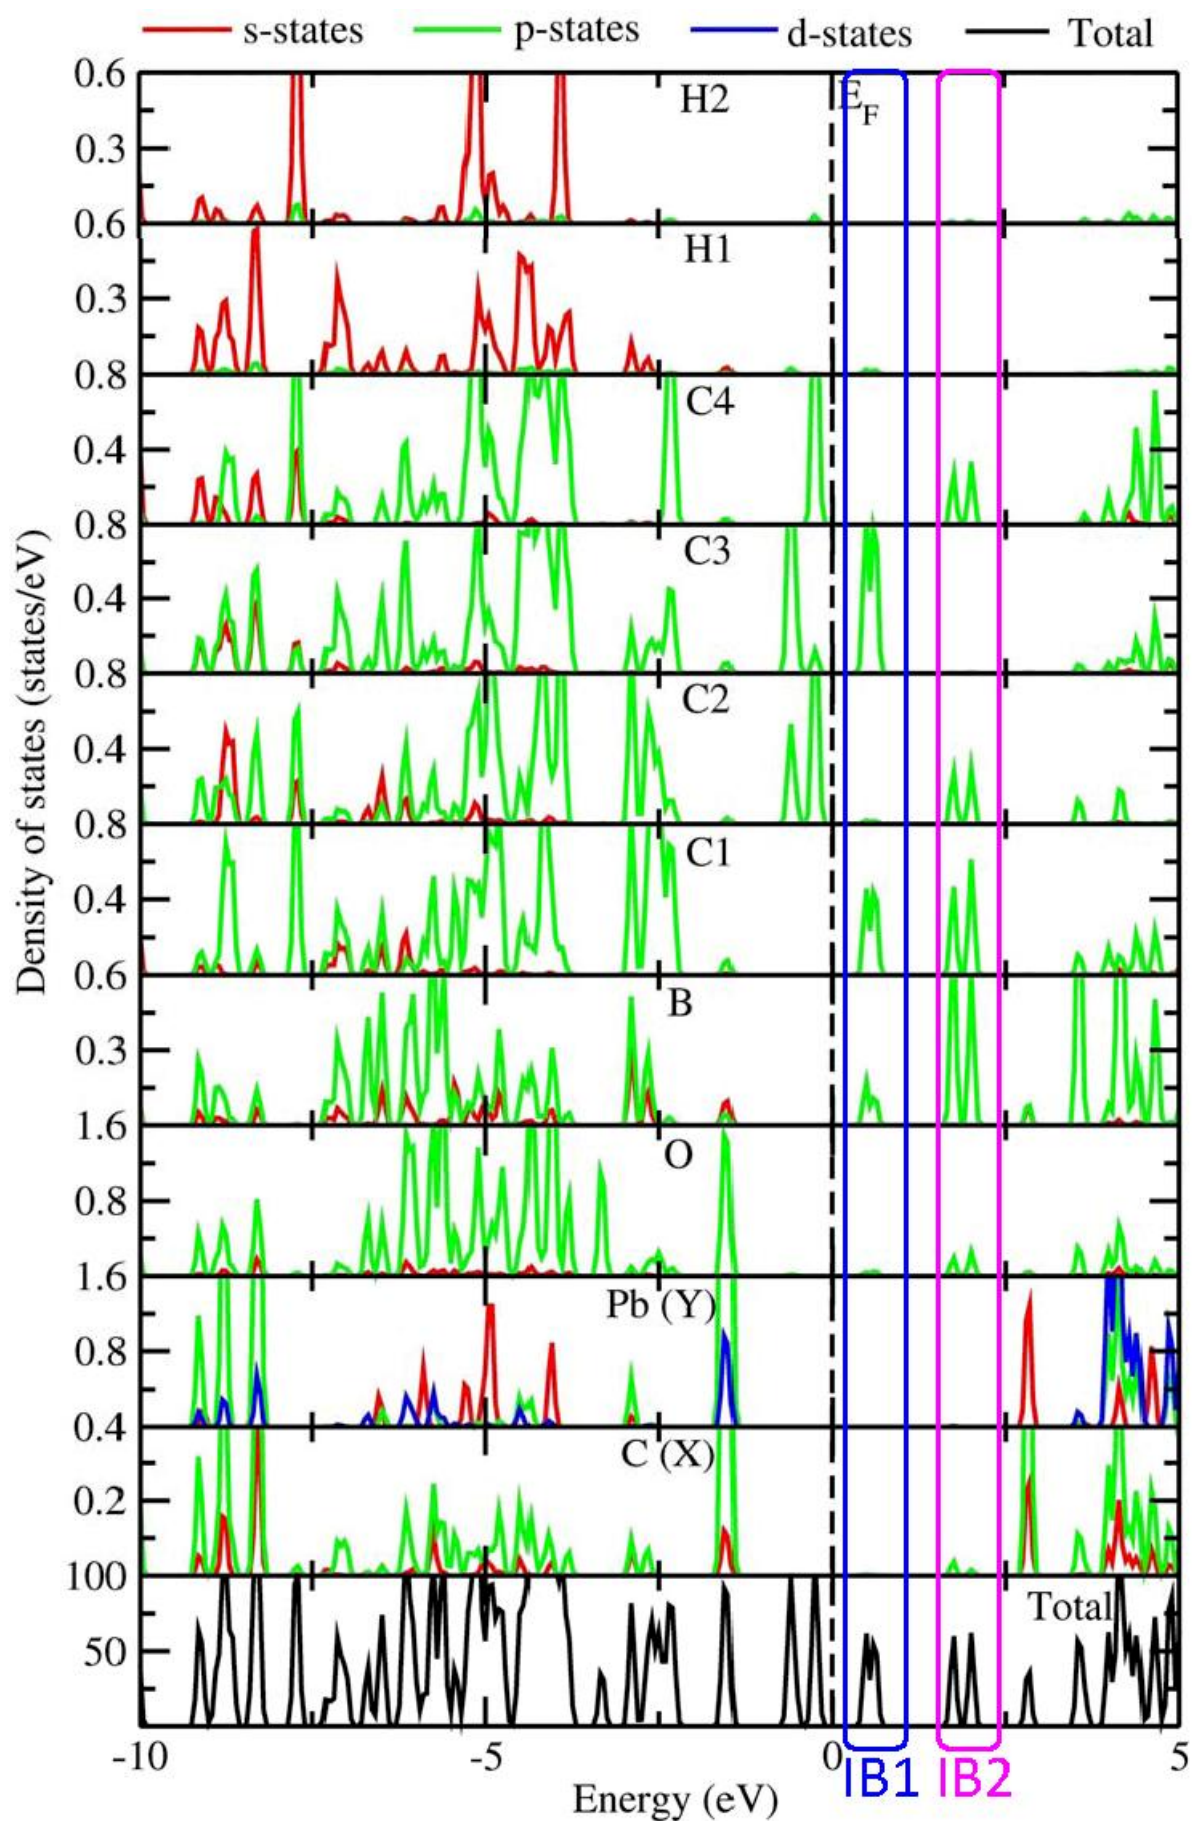

**Figure S13.** The calculated total density of states (TDOS) and partial density of states (PDOS) for (C, Pb) in the cubic  $Fm-3m$  symmetry (no. 225)



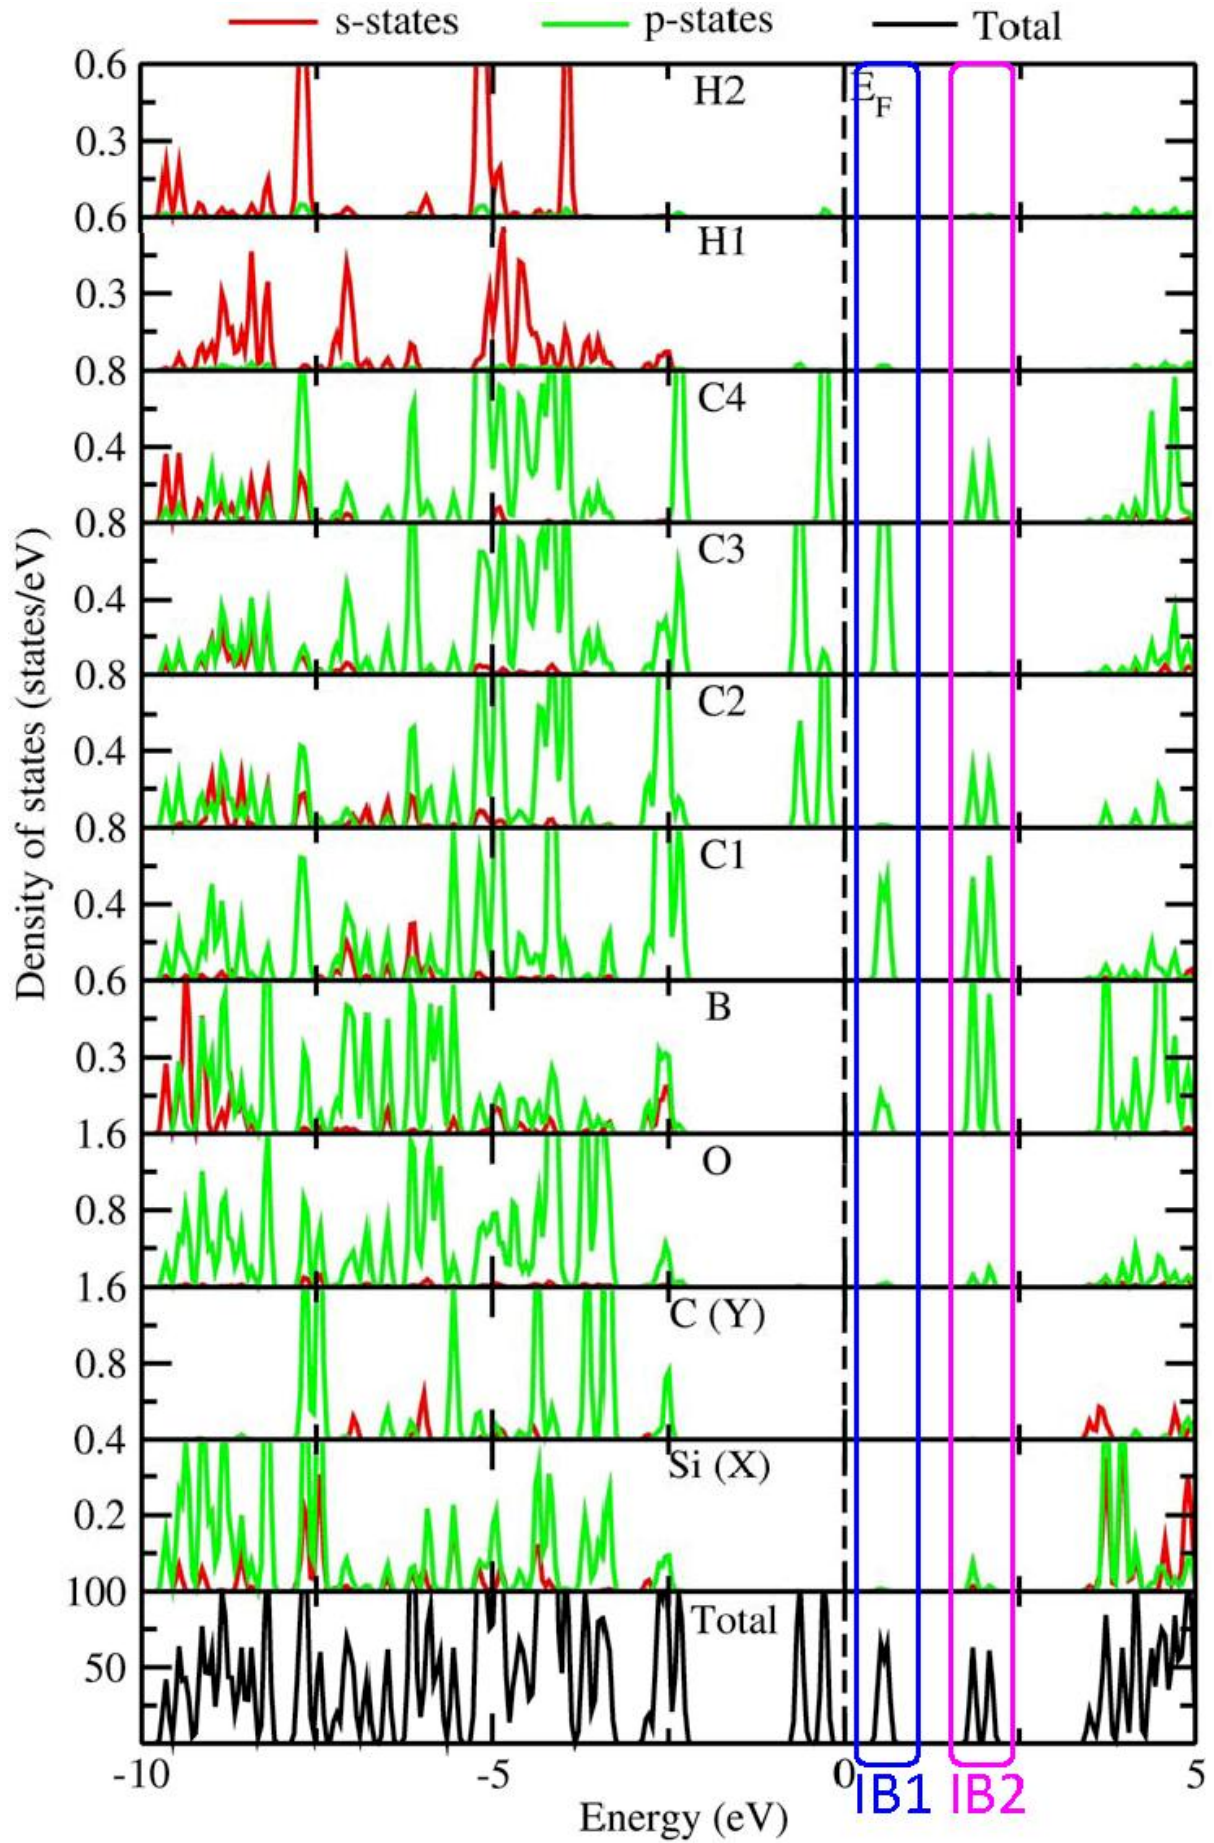

**Figure S14.** The calculated total density of states (TDOS) and partial density of states (PDOS) for (Si, C) in the cubic  $Fm-3m$  symmetry (no. 225)

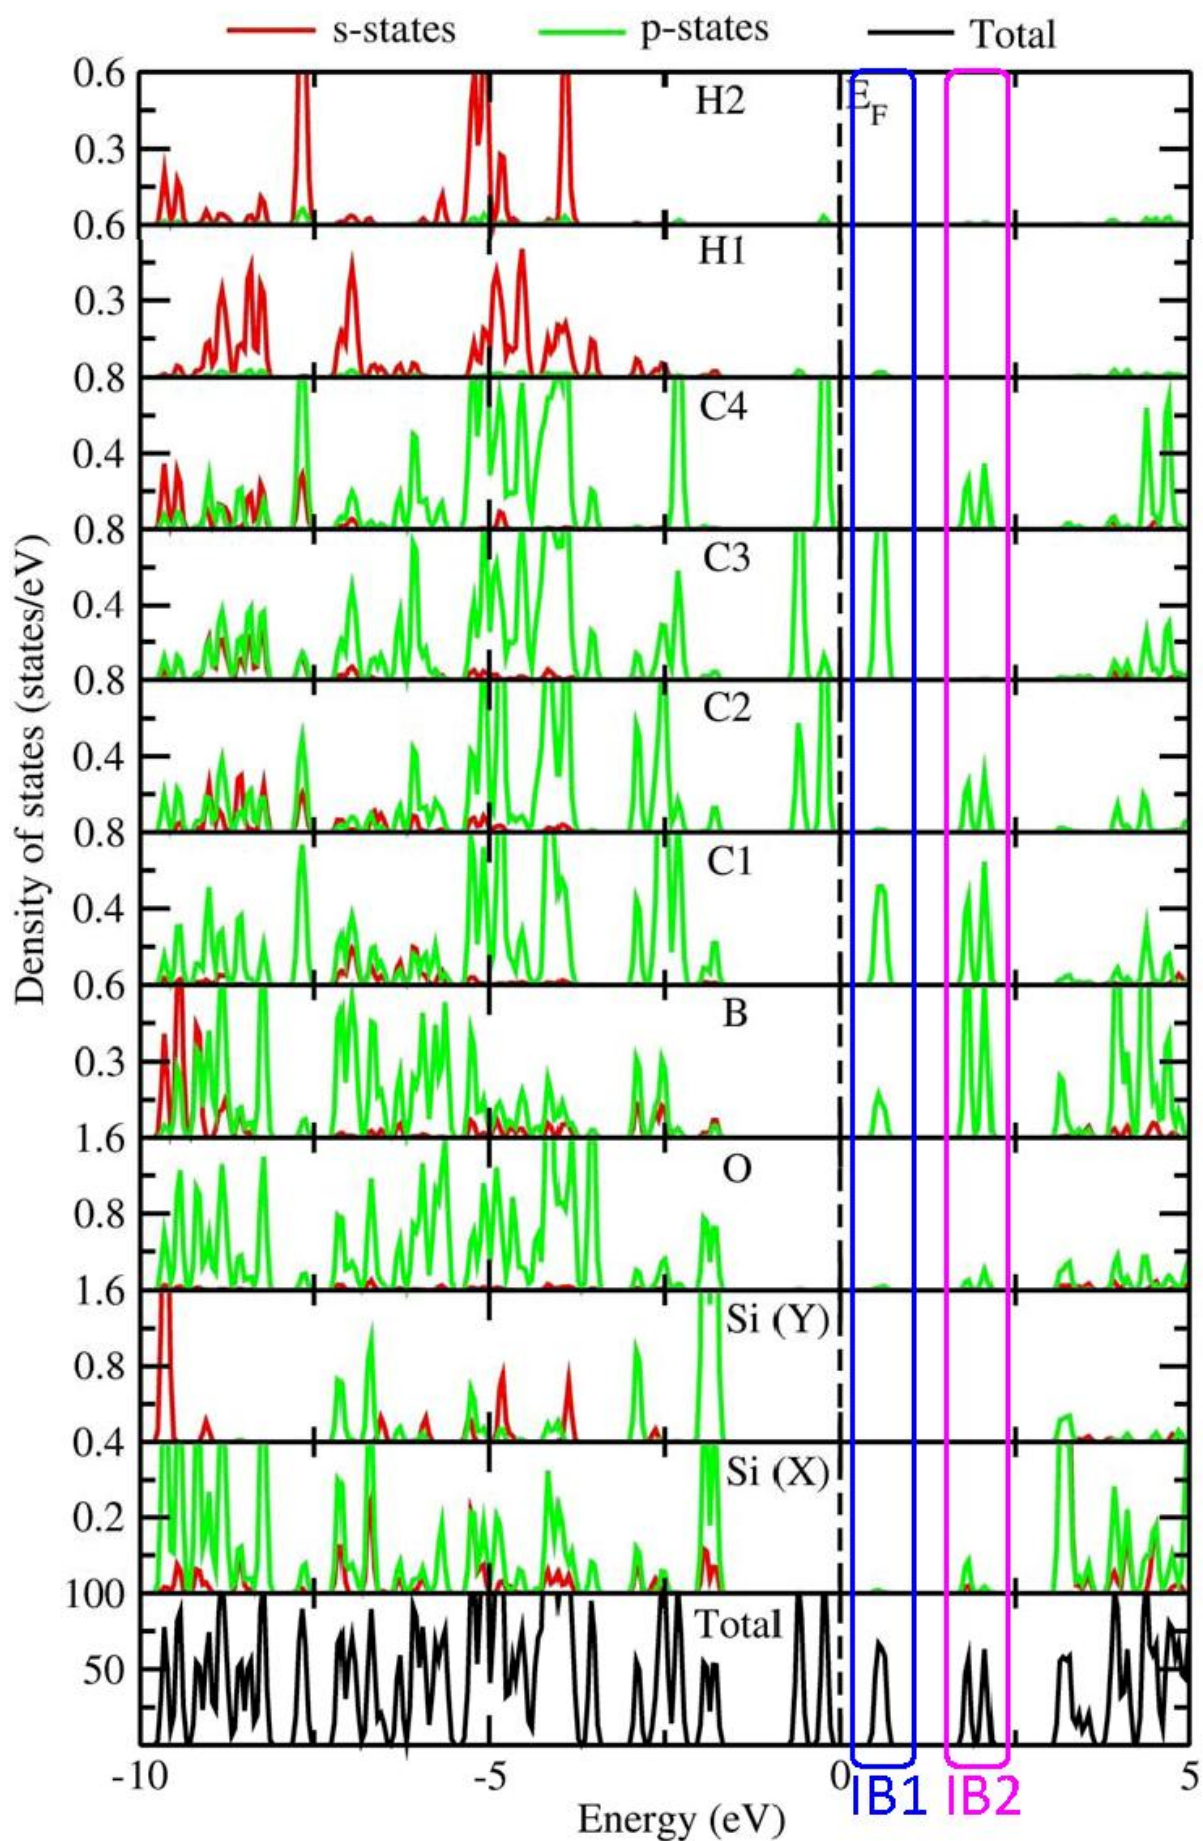

**Figure S15.** The calculated total density of states (TDOS) and partial density of states (PDOS) for (Si, Si) in the cubic  $Fm-3m$  symmetry (no. 225)



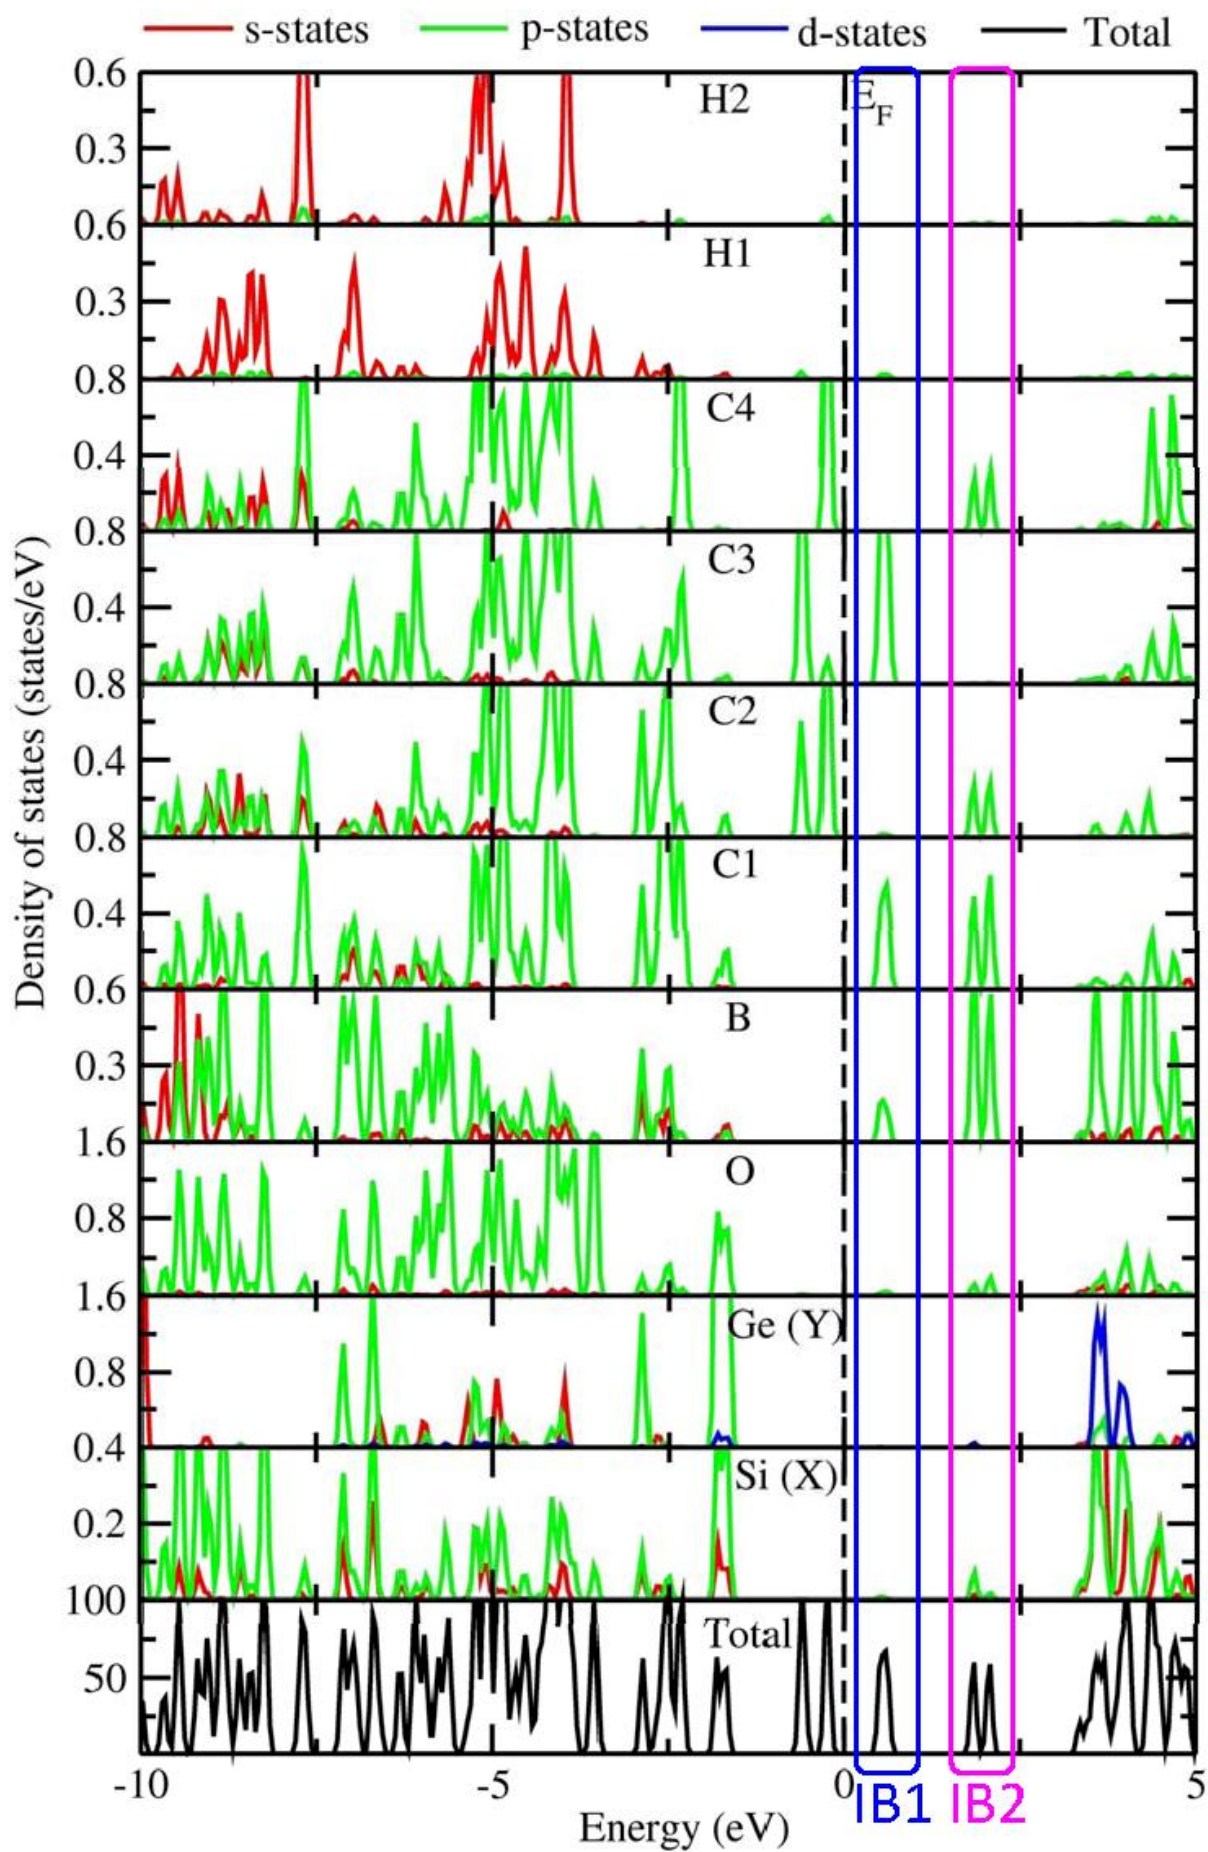

**Figure S16.** The calculated total density of states (TDOS) and partial density of states (PDOS) for (Si, Ge) in the cubic  $Fm-3m$  symmetry (no. 225)

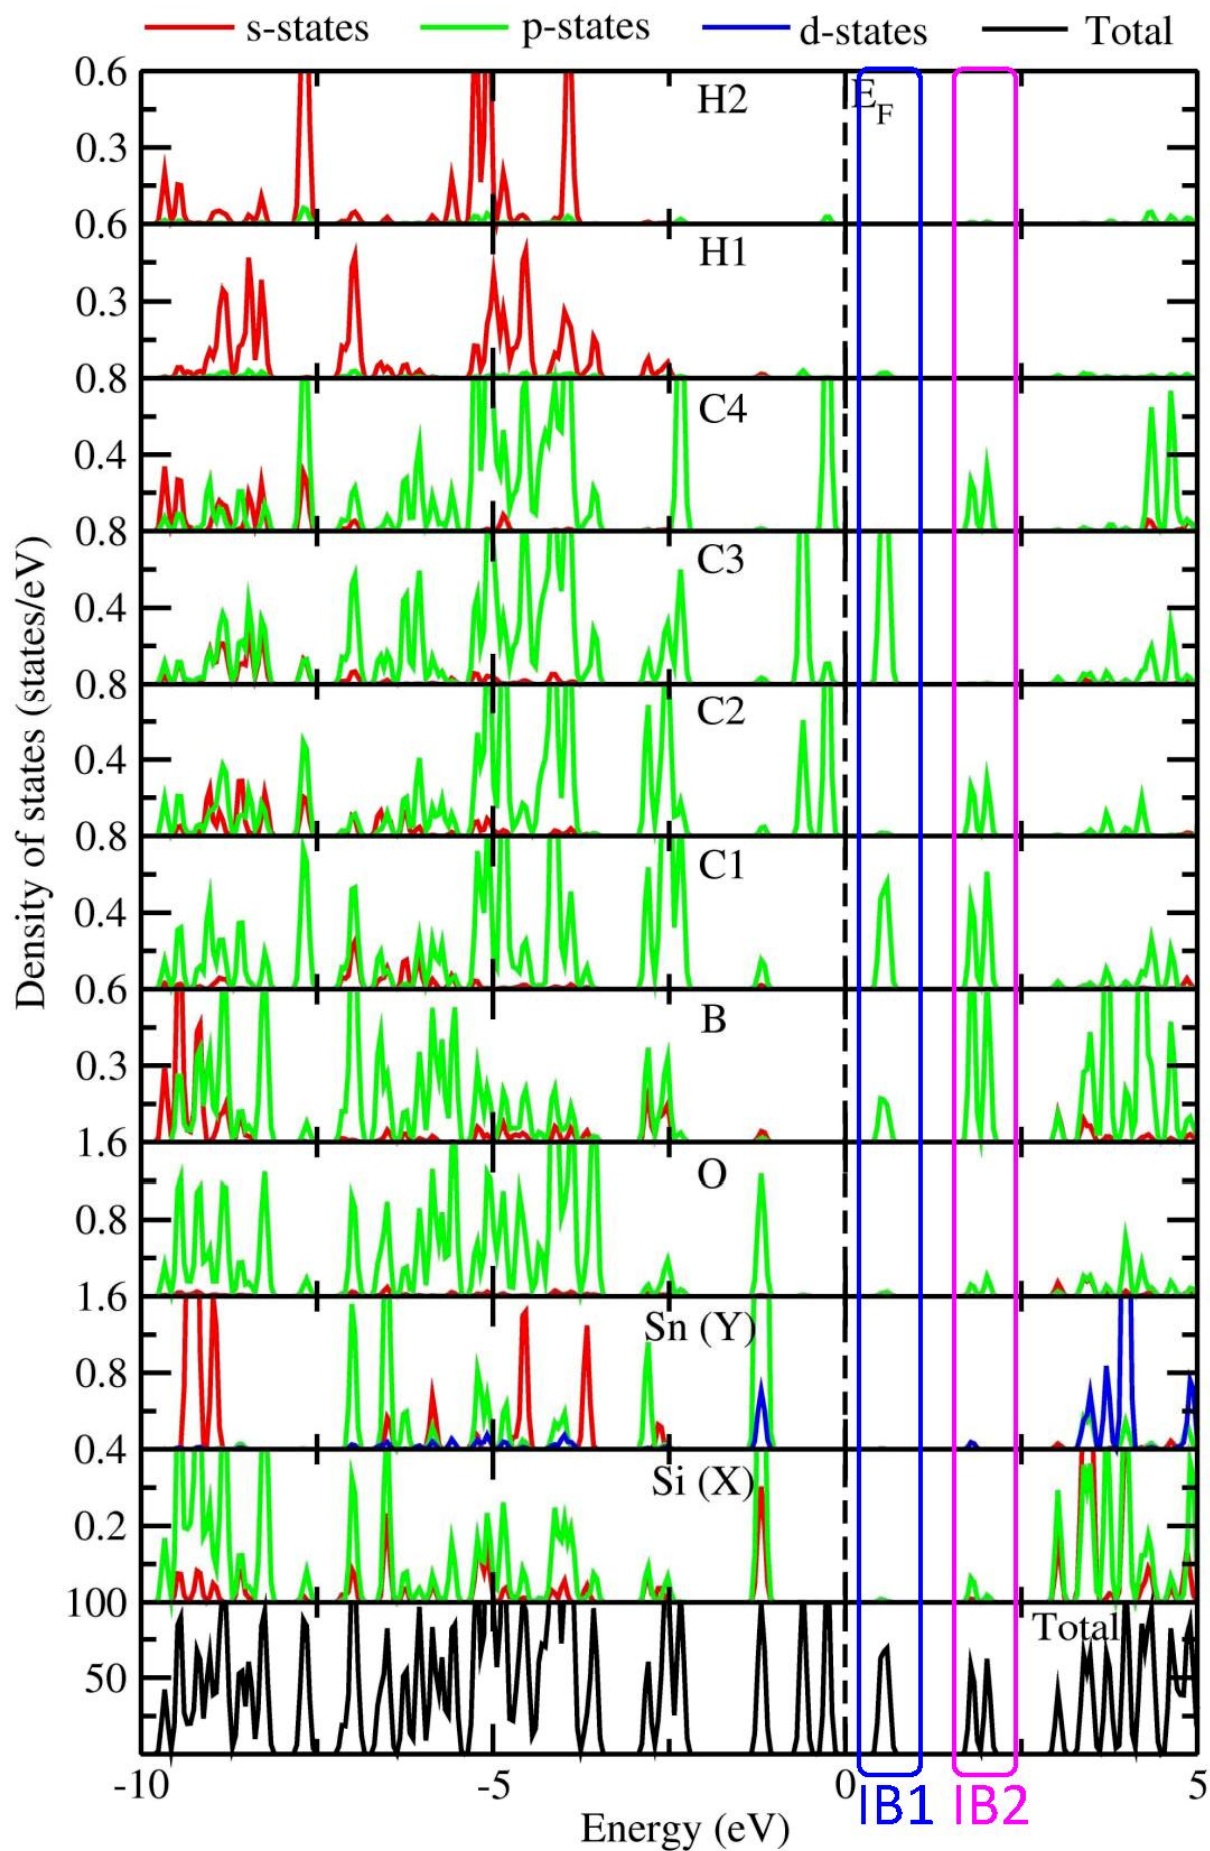

**Figure S17.** The calculated total density of states (TDOS) and partial density of states (PDOS) for (Si, Sn) in the cubic  $Fm-3m$  symmetry (no. 225)



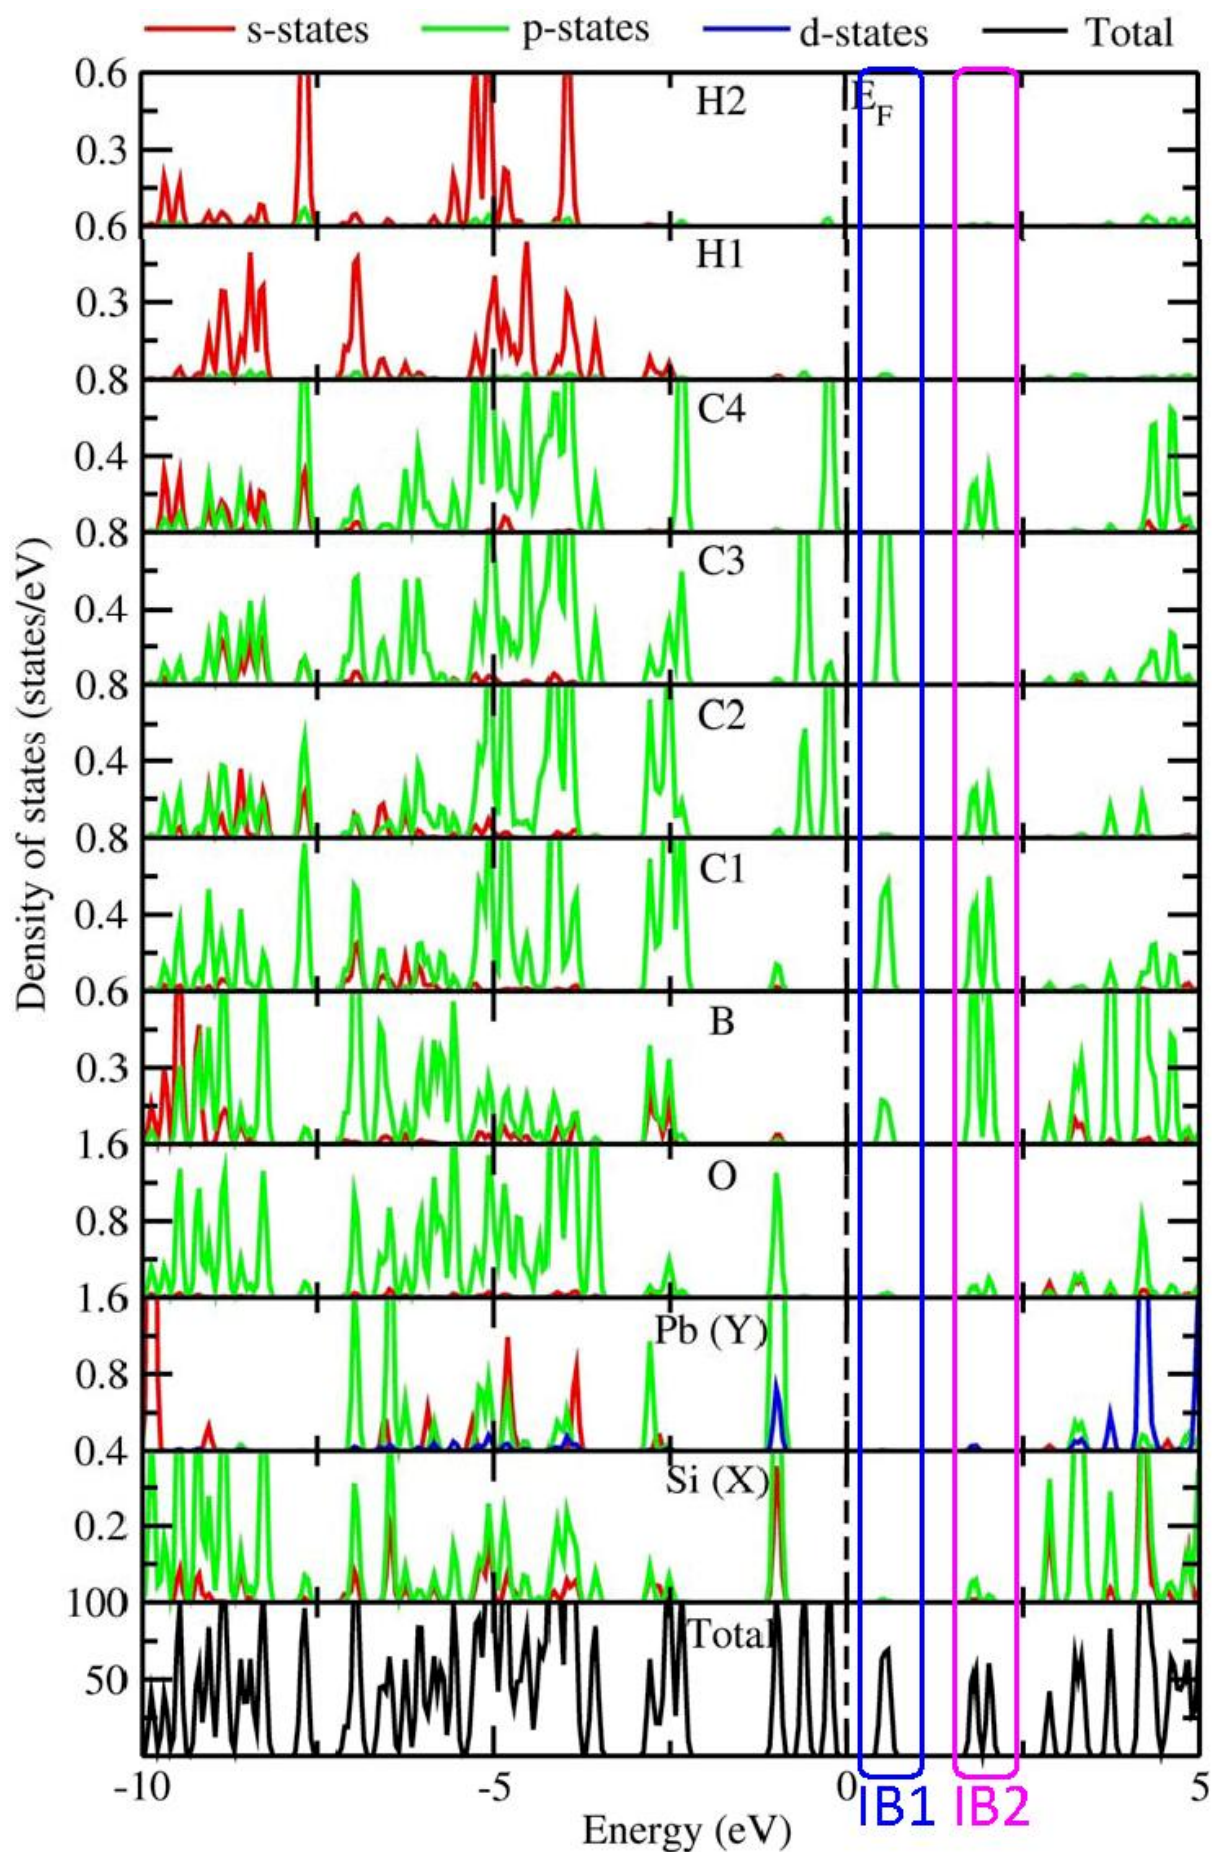

**Figure S18.** The calculated total density of states (TDOS) and partial density of states (PDOS) for (Si, Pb) in the cubic  $Fm-3m$  symmetry (no. 225)

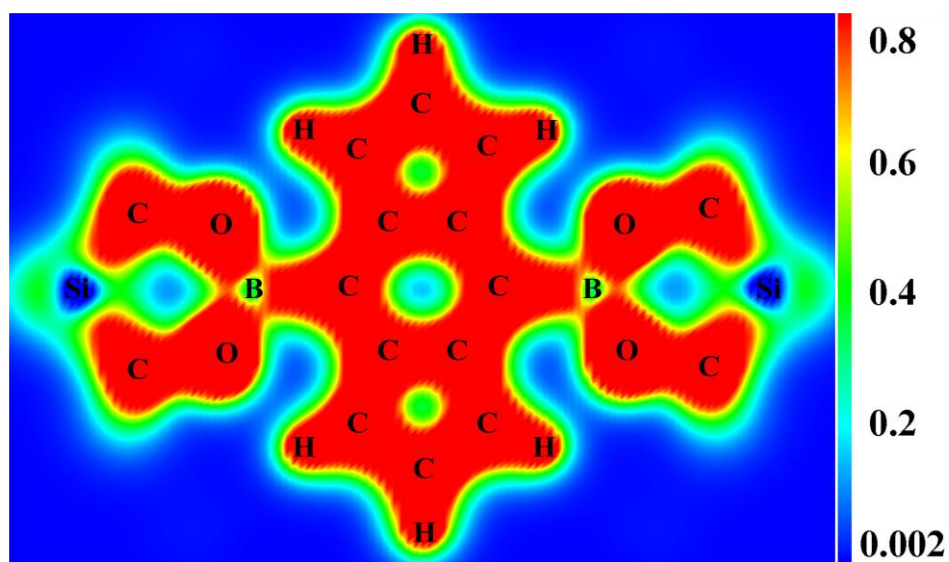

(a)

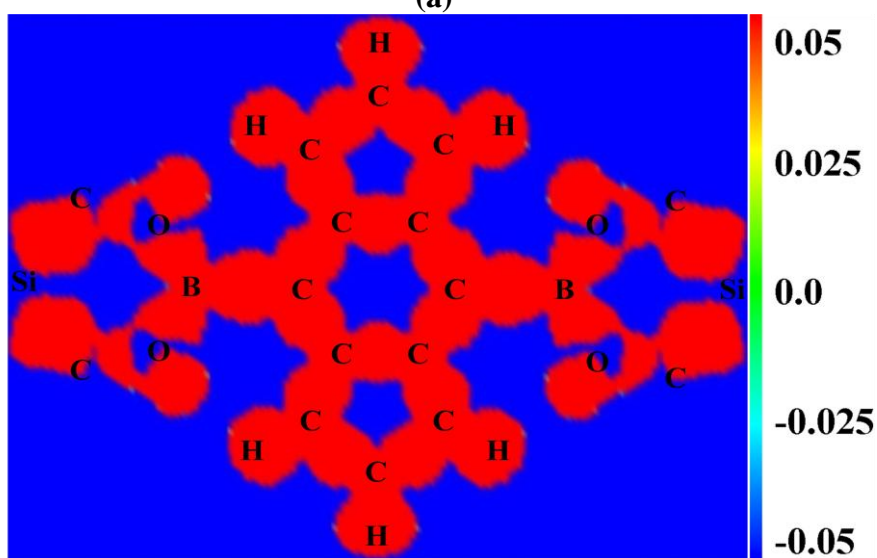

(b)

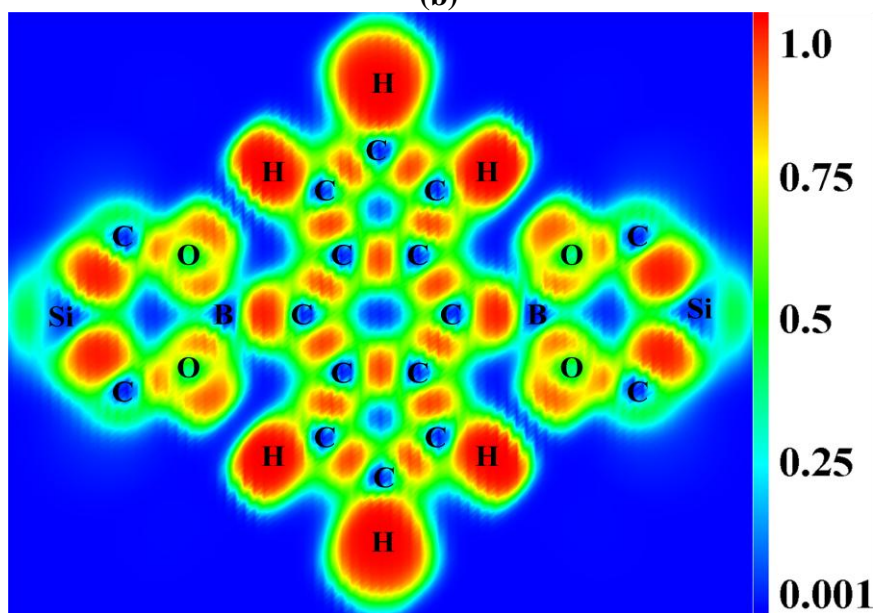

(c)

**Figure S19.** Calculated charge density (a) in  $e/\text{\AA}^3$ , charge transfer (b) in  $e/\text{\AA}^3$ , and electron localization function (c) plots for (C, Si) in the (110) plane.

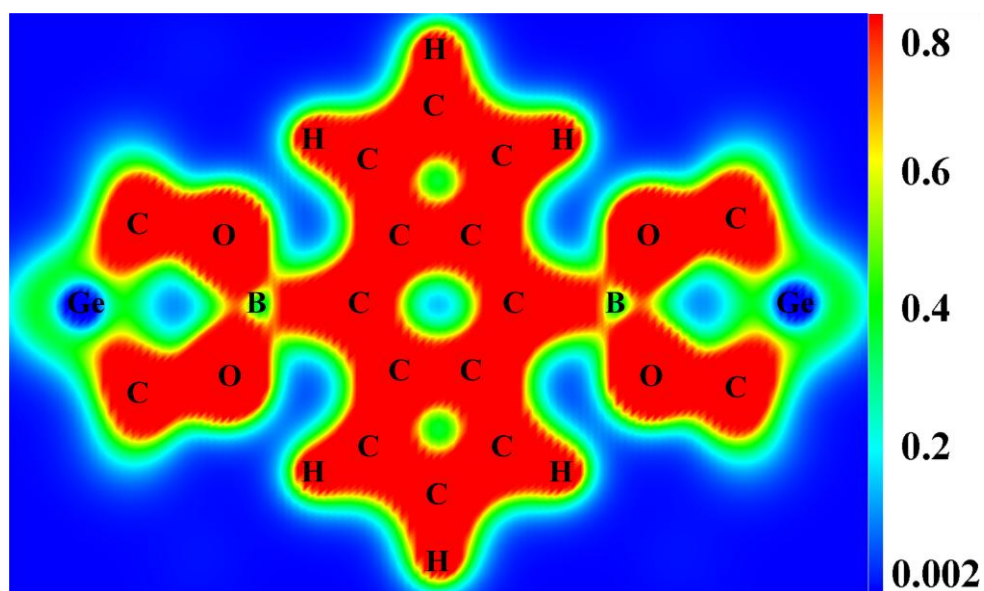

(a)

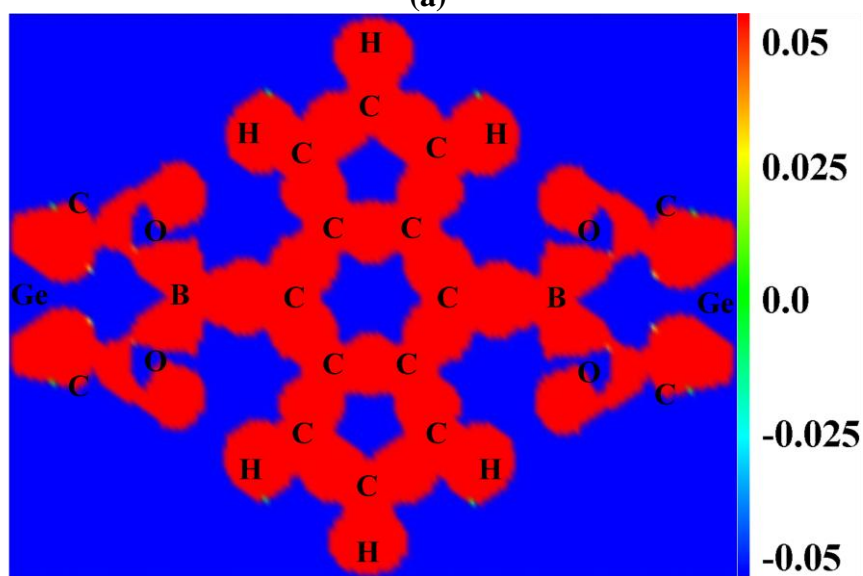

(b)

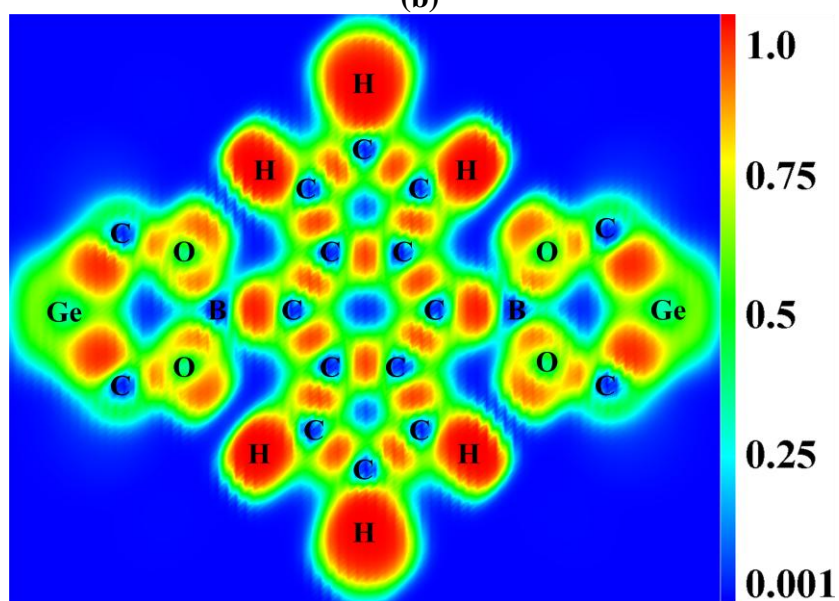

(c)

**Figure S20.** Calculated charge density (a) in  $e/\text{\AA}^3$ , charge transfer (b) in  $e/\text{\AA}^3$ , and electron localization function (c) plots for (C, Ge) in the (110) plane.



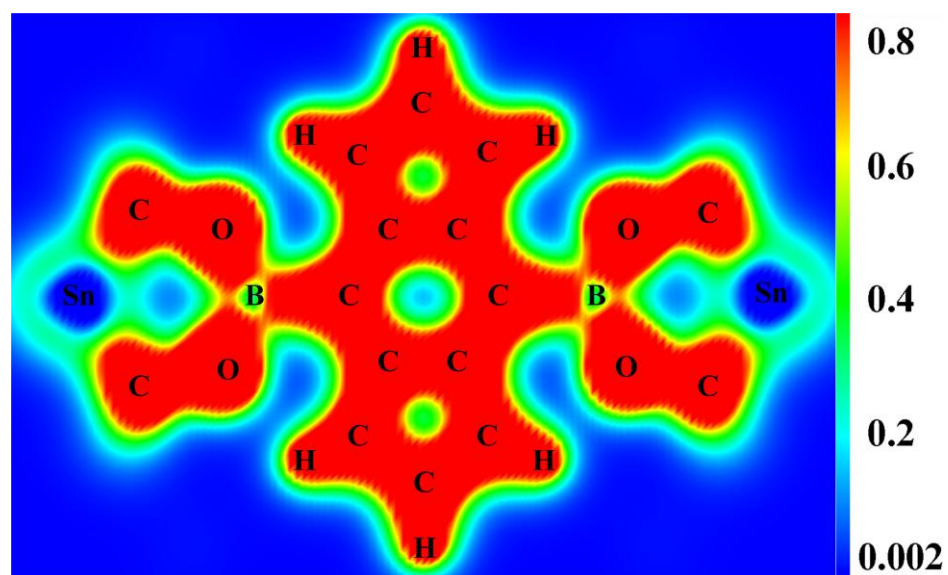

(a)

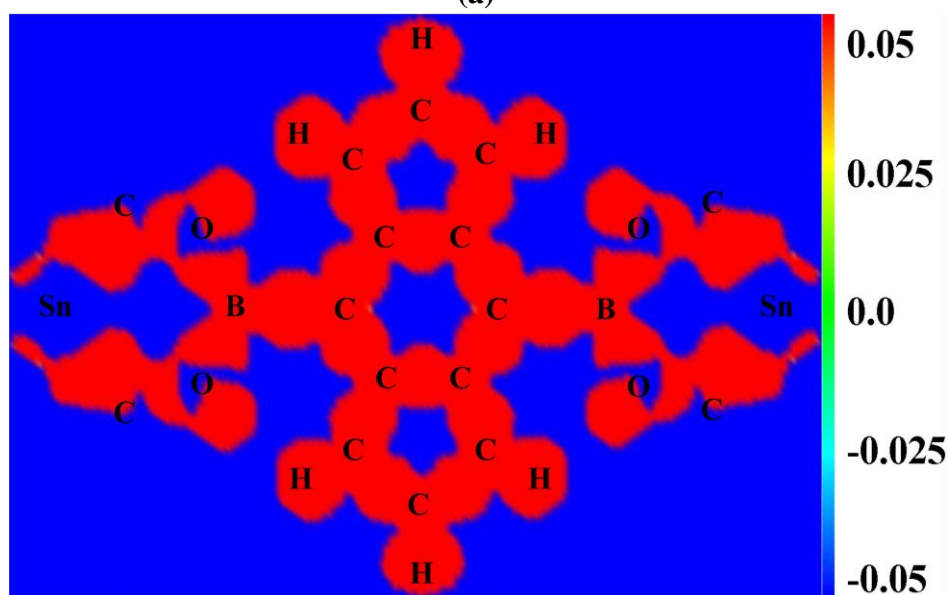

(b)

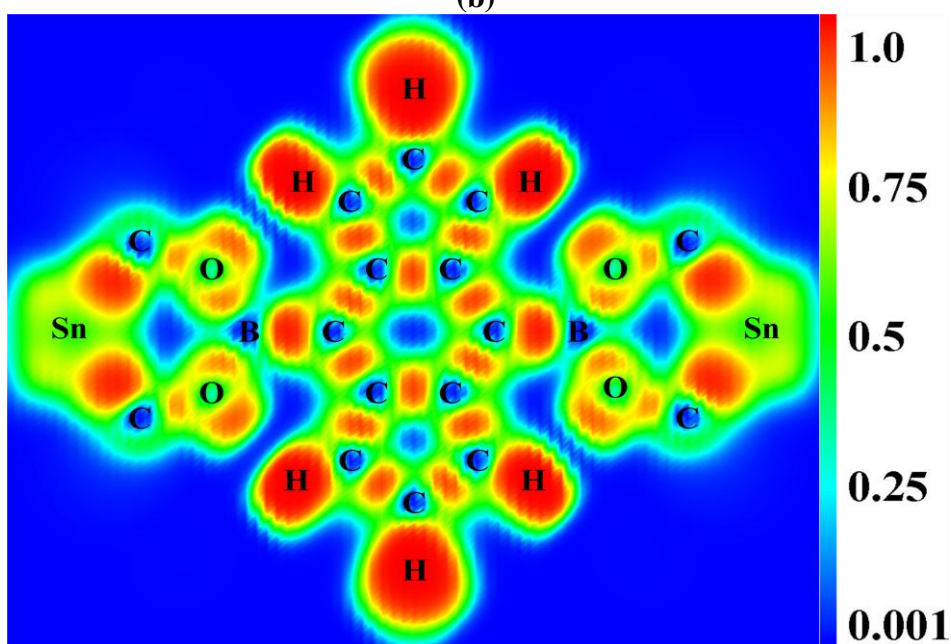

(c)

**Figure S21.** Calculated charge density (a) in  $e/\text{\AA}^3$ , charge transfer (b) in  $e/\text{\AA}^3$ , and electron localization function (c) plots for (C, Sn) in the (110) plane.



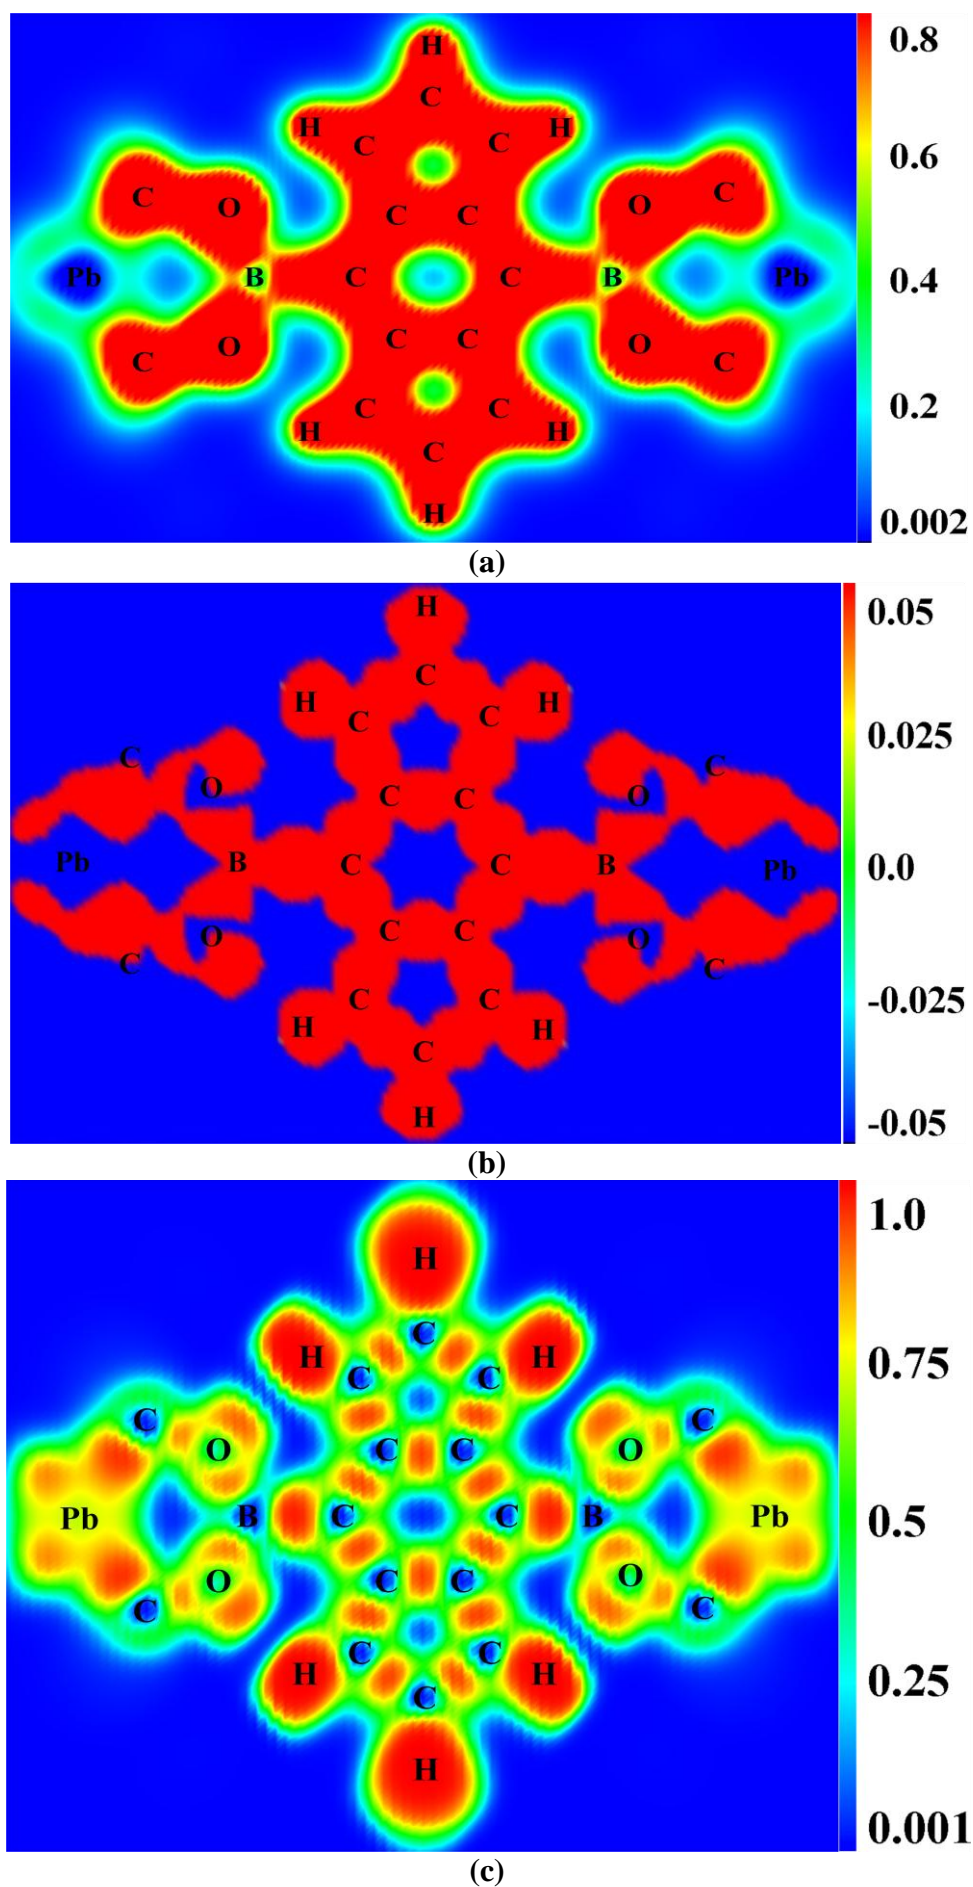

**Figure S22.** Calculated charge density (a) in  $e\text{\AA}^3$ , charge transfer (b) in  $e\text{\AA}^3$ , and electron localization function (c) plots for (C, Pb) in the (110) plane.

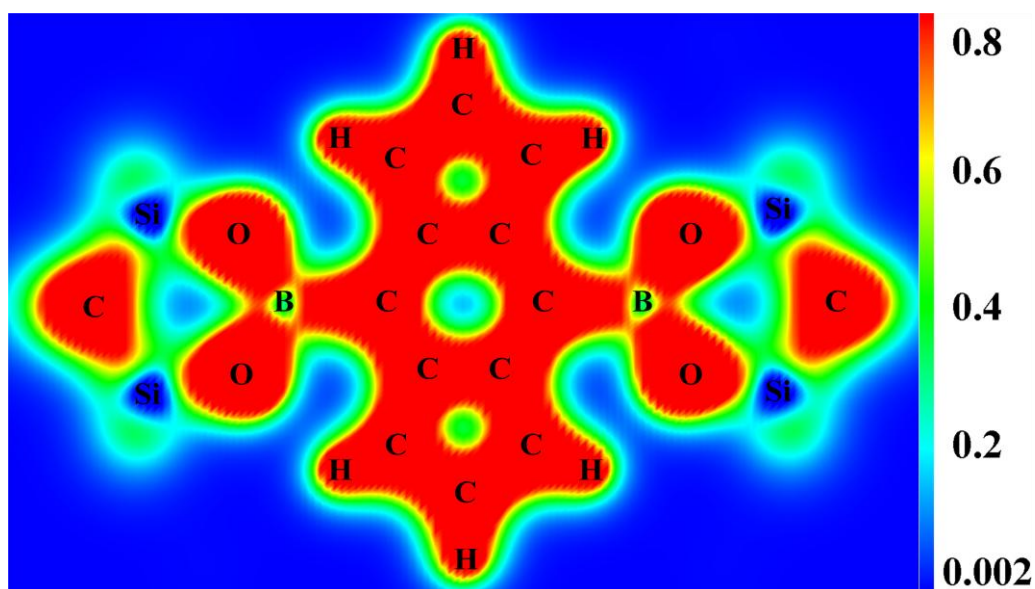

(a)

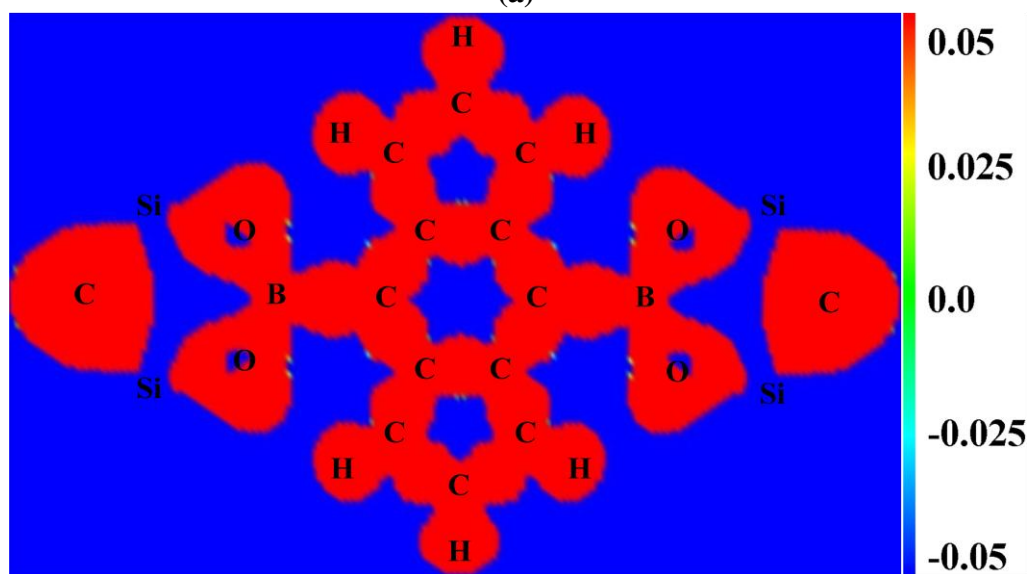

(b)

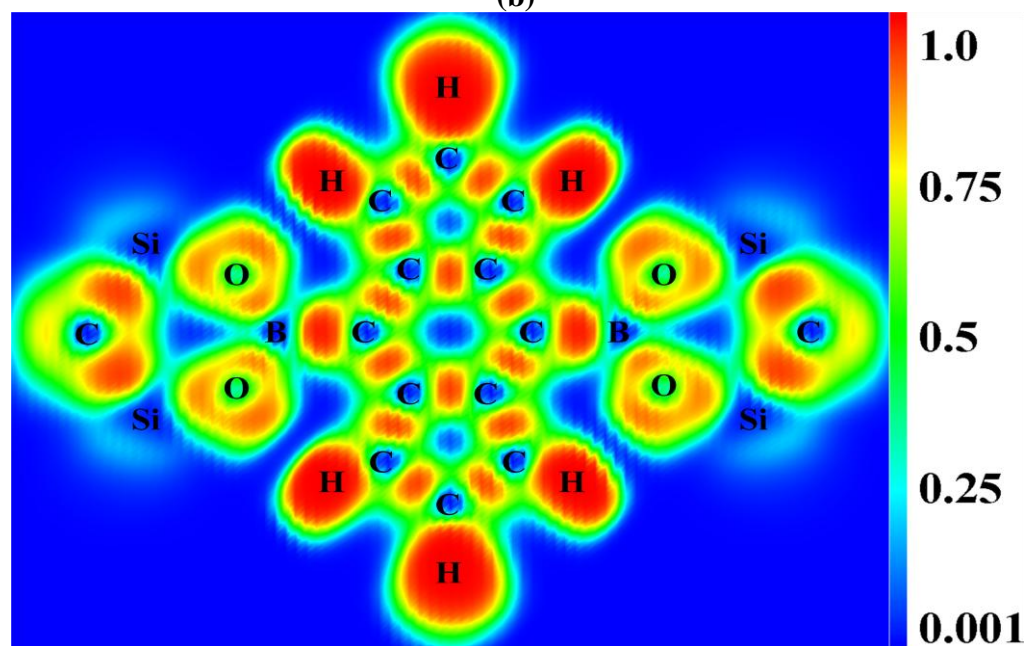

(c)

**Figure S23.** Calculated charge density (a) in  $e/\text{\AA}^3$ , charge transfer (b) in  $e/\text{\AA}^3$ , and electron localization function (c) plots for (Si, C) in the (110) plane.





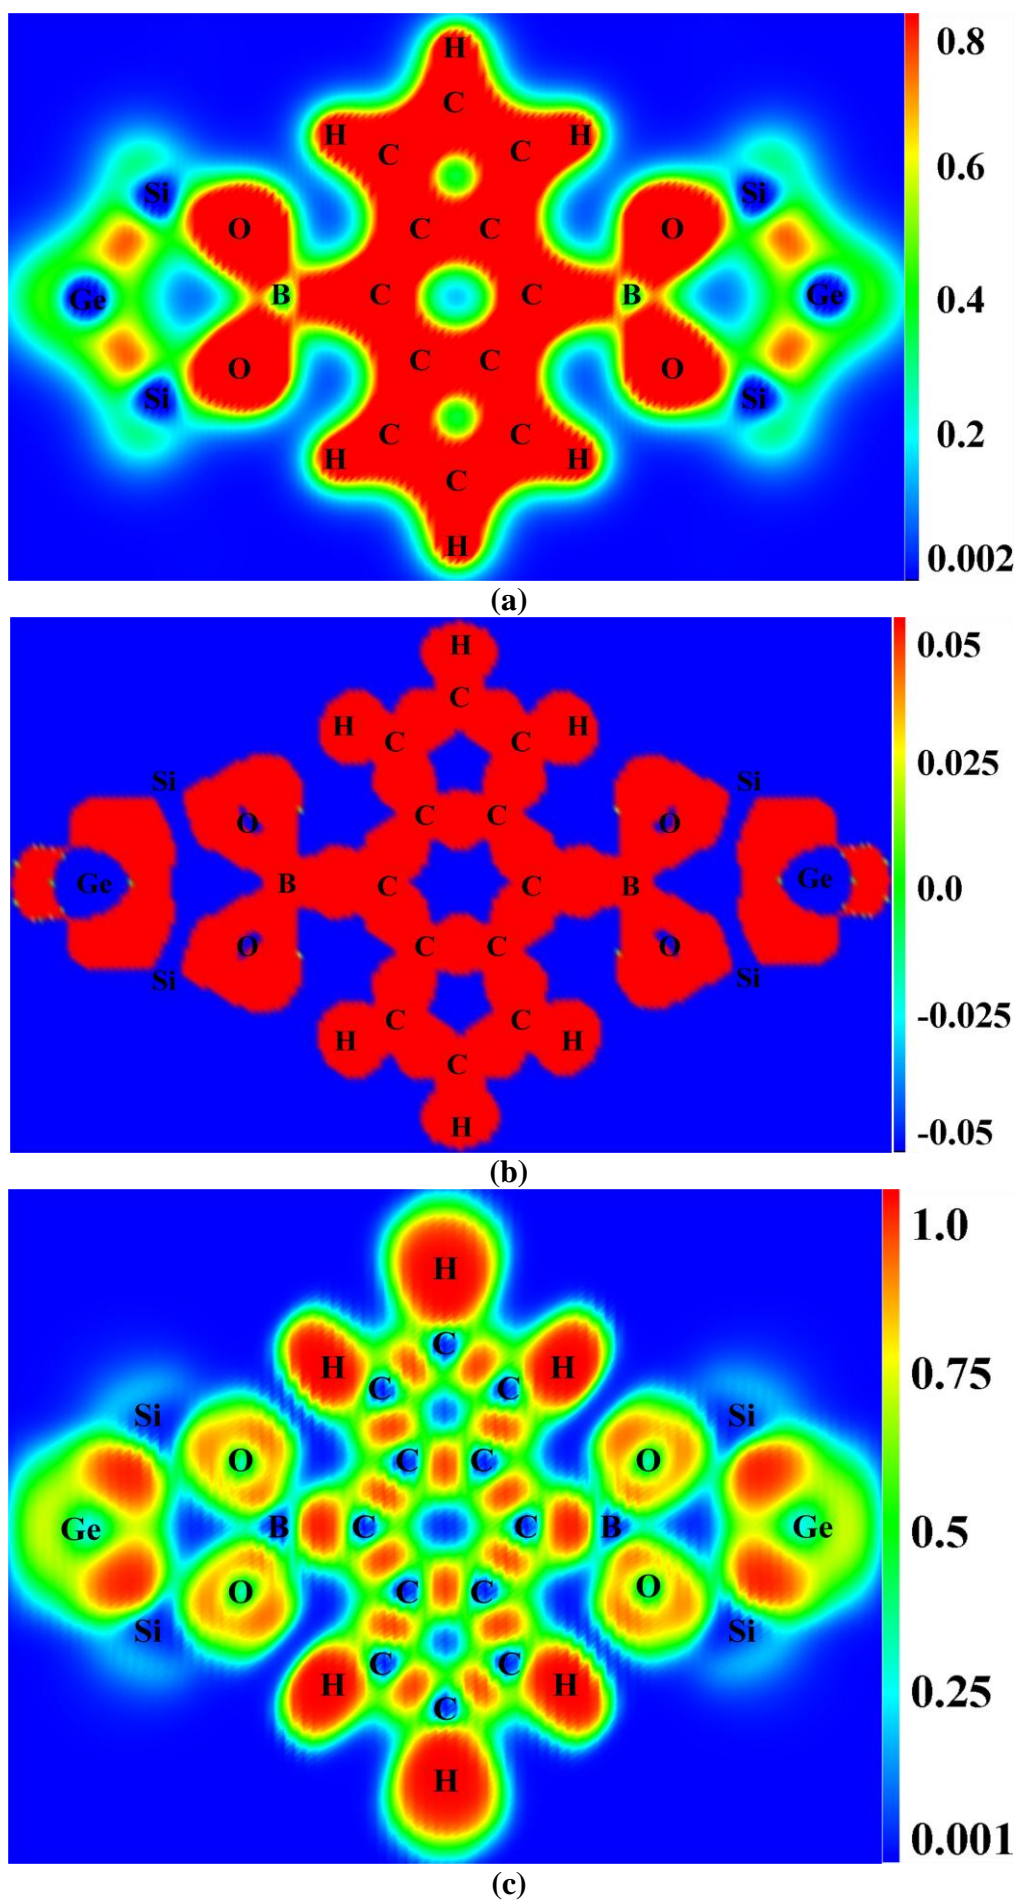

**Figure S25.** Calculated charge density (a) in  $e/\text{\AA}^3$ , charge transfer (b) in  $e/\text{\AA}^3$ , and electron localization function (c) plots for (Si, Ge) in the (110) plane.

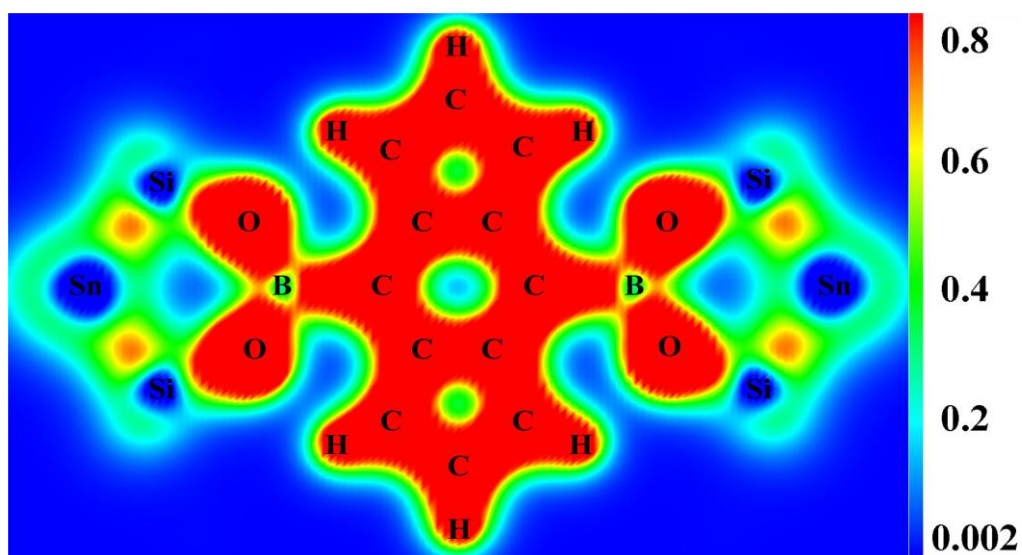

(a)

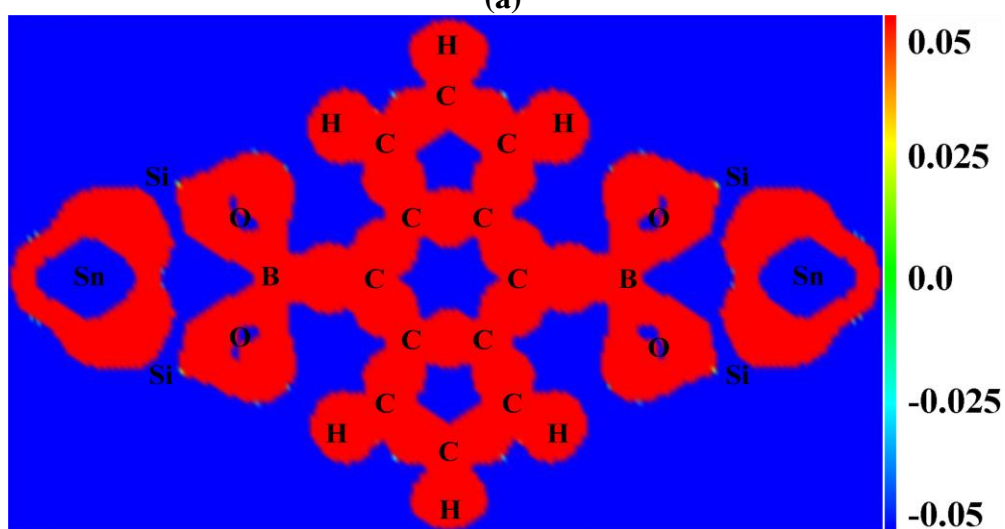

(b)

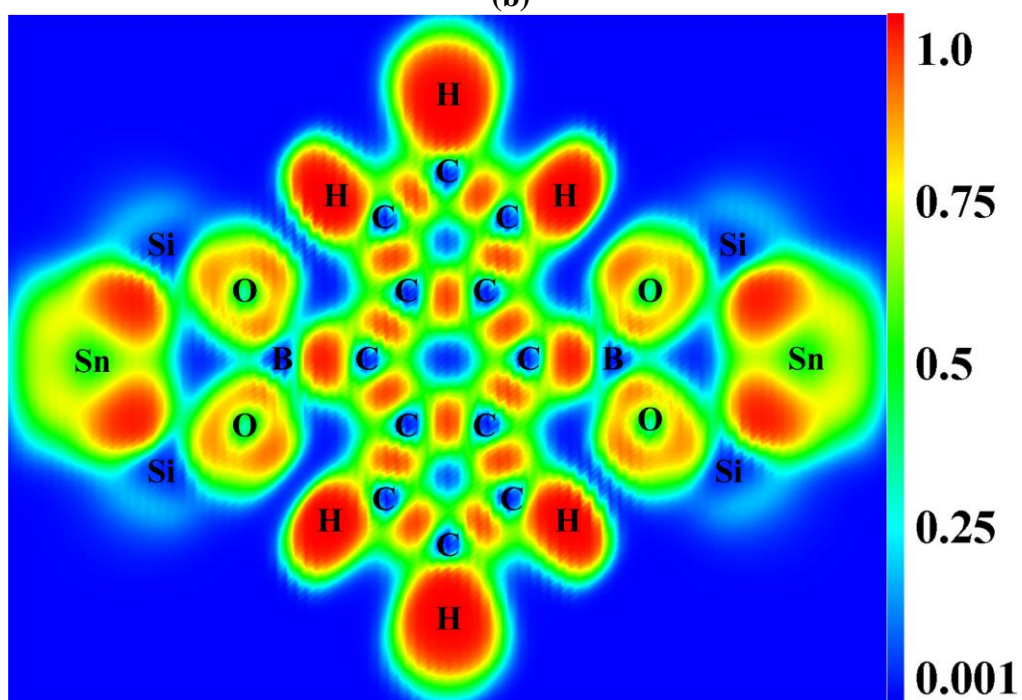

(c)

**Figure S26.** Calculated charge density (a) in  $e\text{\AA}^3$ , charge transfer (b) in  $e\text{\AA}^3$ , and electron localization function (c) plots for (Si, Sn) in the (110) plane.



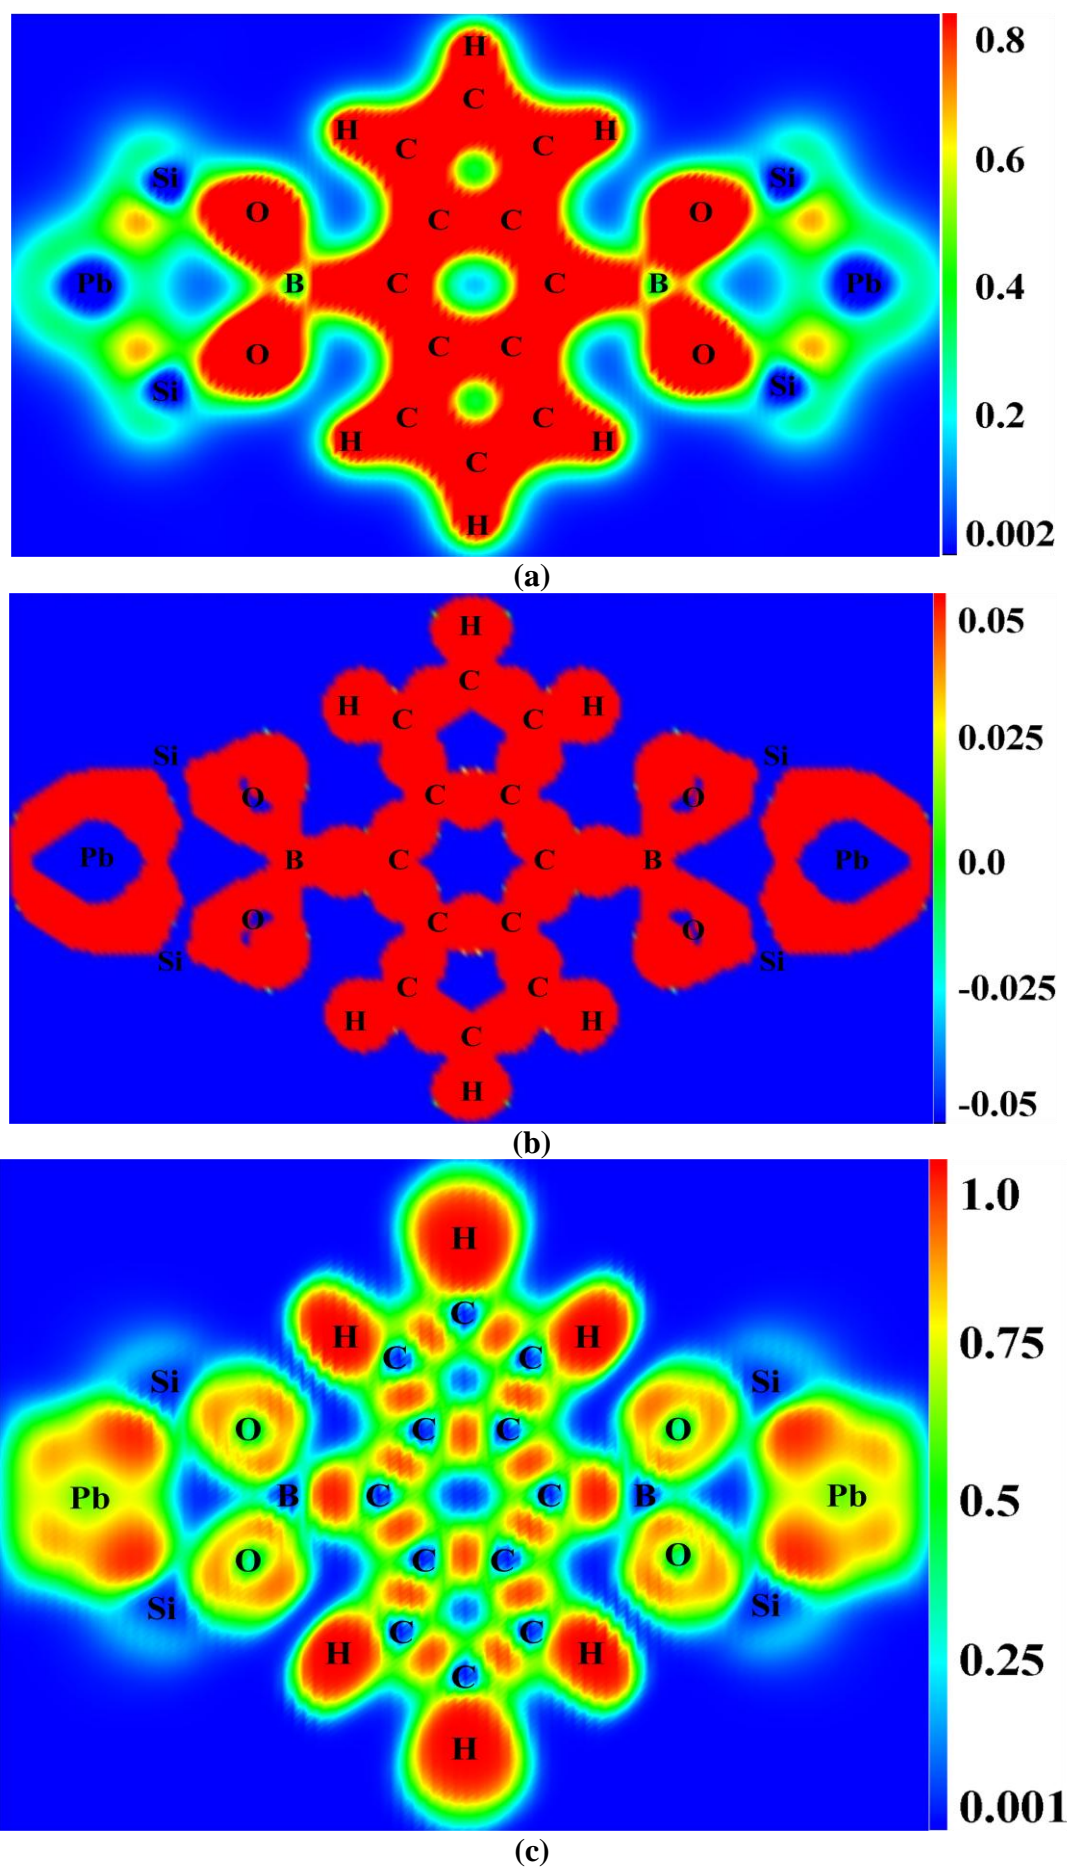

**Figure S27.** Calculated charge density (a) in  $e/\text{\AA}^3$ , charge transfer (b) in  $e/\text{\AA}^3$ , and electron localization function (c) plots for (Si, Pb) in the (110) plane.

**Table S3.** The calculated enthalpies of formation ( $\Delta H$ ;  $\text{kJ mol}^{-1}f.u.^{-1}$ ) according to eq 1 for the  $[(X_4Y)(O_2B-C_{12}H_6-BO_2)_3]$  ( $X=C/Si$ ;  $Y=C, Si, Ge, Sn, \text{ and Pb}$ ) compounds.  $1f.u.= [(X_4Y)(O_2B-C_{12}H_6-BO_2)_3]$

|                                          |         |          |          |          |          |
|------------------------------------------|---------|----------|----------|----------|----------|
| $(X_4Y)(O_2B-C_{12}H_6-BO_2)_3$          | (C, C)  | (C, Si)  | (C, Ge)  | (C, Sn)  | (C, Pb)  |
| $\Delta H (\text{kJ mol}^{-1}f.u.^{-1})$ | -27.586 | -27.88   | -26.94   | -22.90   | -19.43   |
| $(X_4Y)(O_2B-C_{12}H_6-BO_2)_3$          | (Si, C) | (Si, Si) | (Si, Ge) | (Si, Sn) | (Si, Pb) |
| $\Delta H (\text{kJ mol}^{-1}f.u.^{-1})$ | -51.55  | -46.74   | -46.895  | -42.54   | -40.08   |

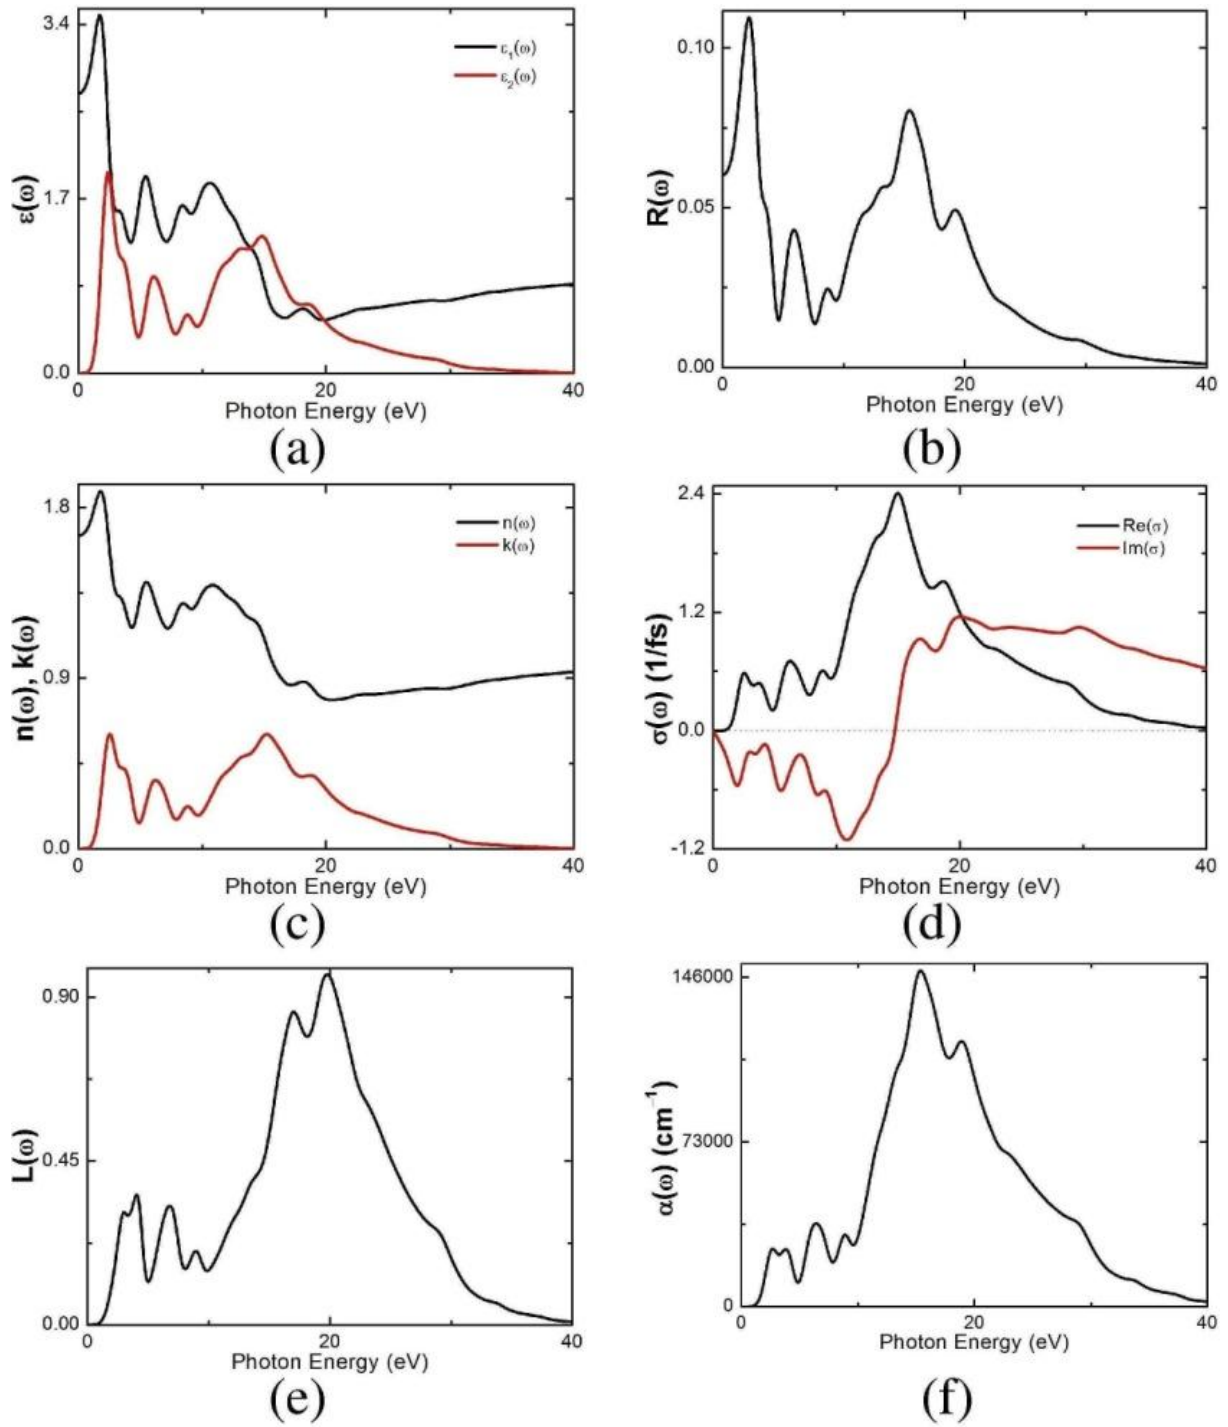

**Figure S28.** Calculated optical properties for (C, C): (a) dielectric function  $\epsilon(\omega)$ , (b) reflectivity  $R(\omega)$ , (c) refractive index  $n(\omega)$ ; extinction coefficient  $k(\omega)$ , (d) optical conductivity  $\sigma(\omega)$ , (e) energy loss function  $L(\omega)$ , and (f) absorption  $\alpha(\omega)$ .



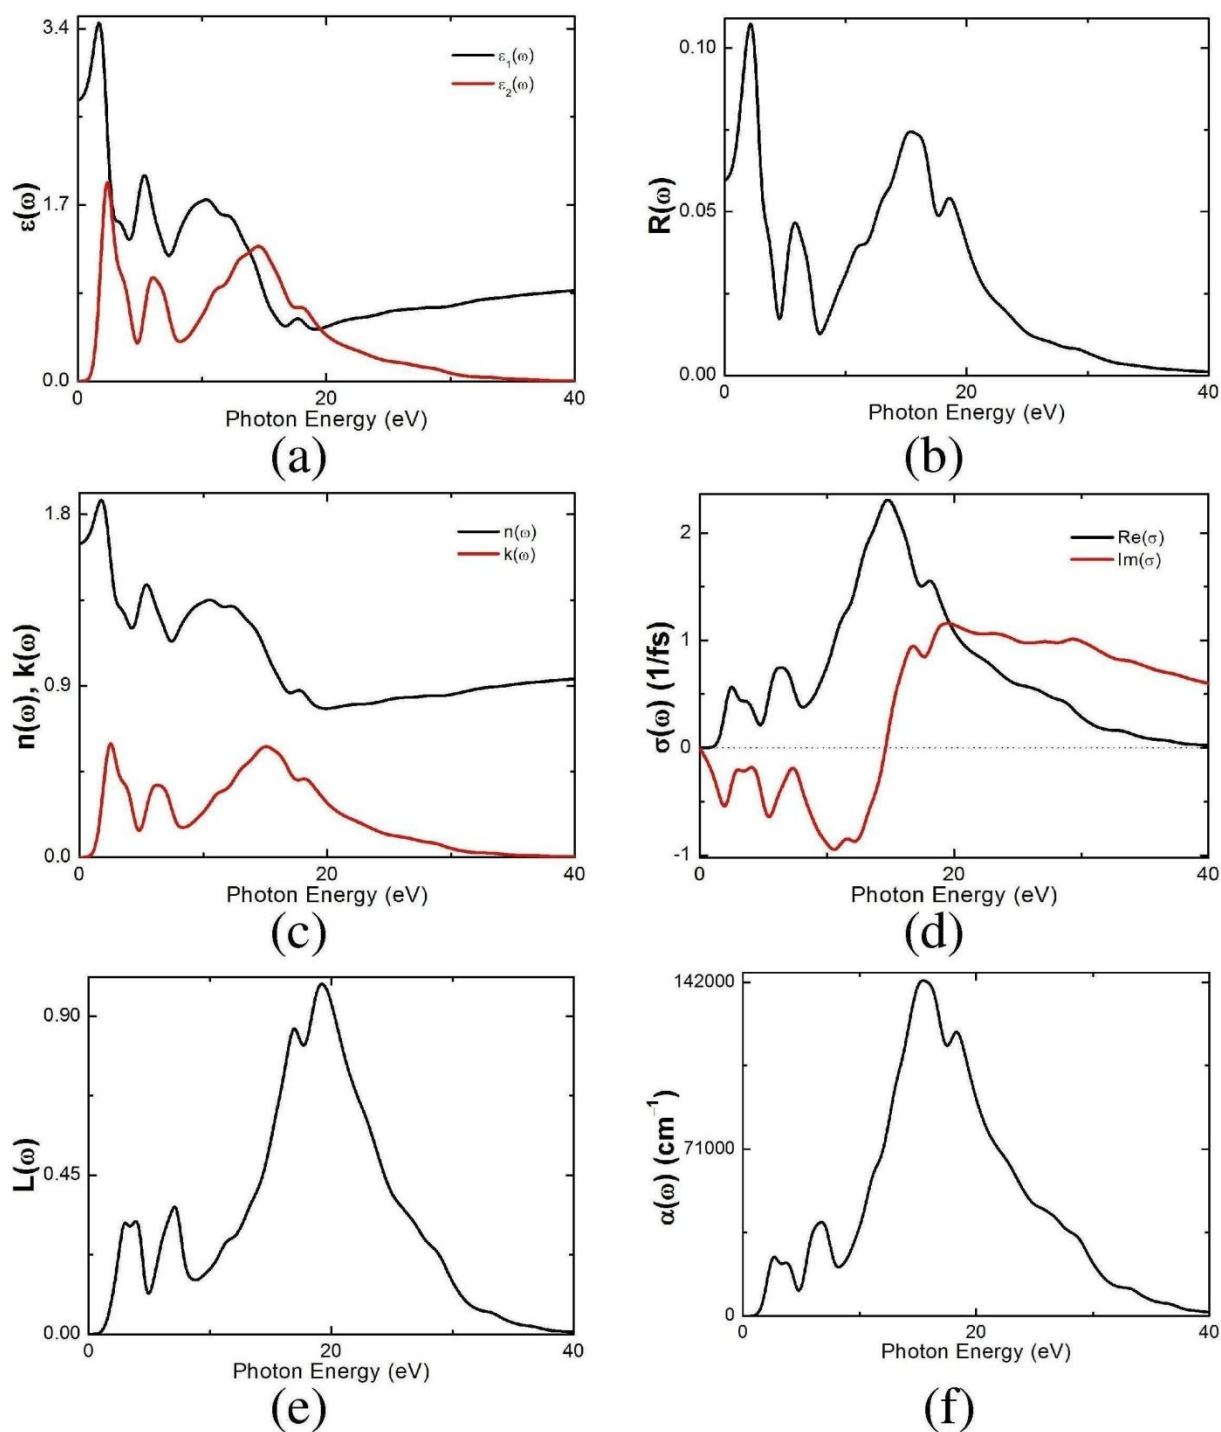

**Figure S29.** Calculated optical properties for (C, Si): (a) dielectric function  $\epsilon(\omega)$ , (b) reflectivity  $R(\omega)$ , (c) refractive index  $n(\omega)$ ; extinction coefficient  $k(\omega)$ , (d) optical conductivity  $\sigma(\omega)$ , (e) energy loss function  $L(\omega)$ , and (f) absorption  $\alpha(\omega)$ .

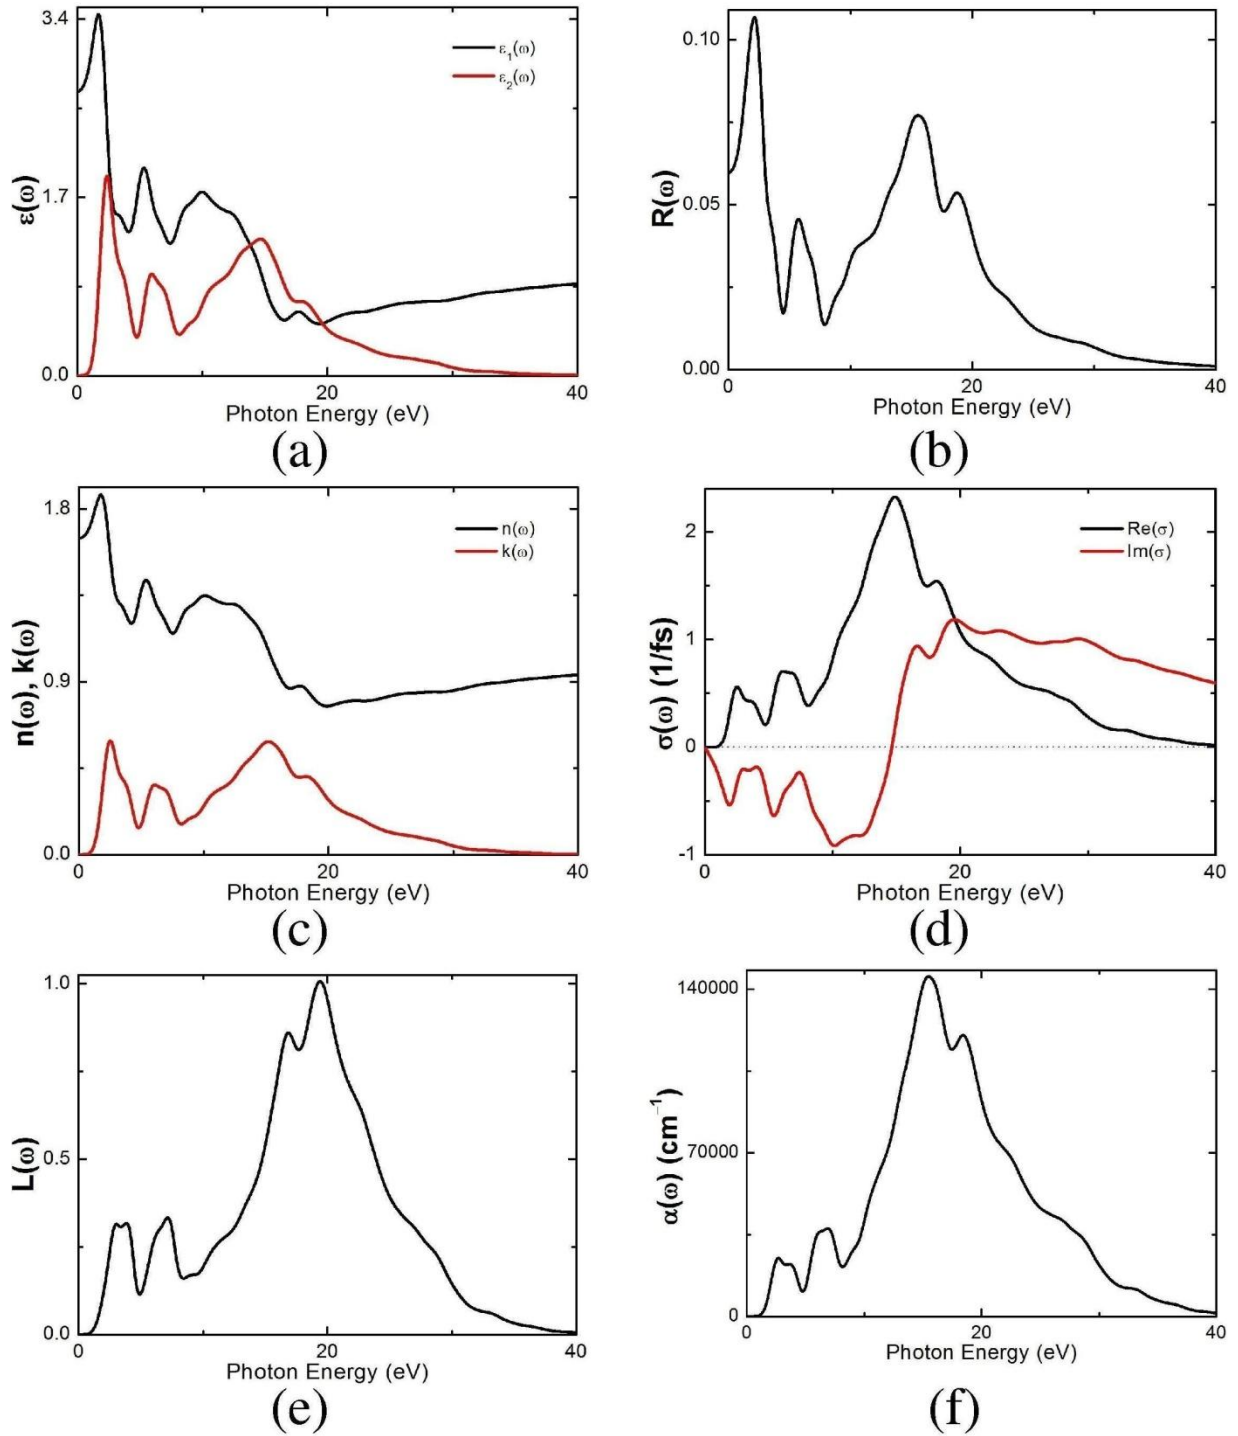

**Figure S30.** Calculated optical properties for (C, Ge): (a) dielectric function  $\epsilon(\omega)$ , (b) reflectivity  $R(\omega)$ , (c) refractive index  $n(\omega)$ ; extinction coefficient  $k(\omega)$ , (d) optical conductivity  $\sigma(\omega)$ , (e) energy loss function  $L(\omega)$ , and (f) absorption  $\alpha(\omega)$ .

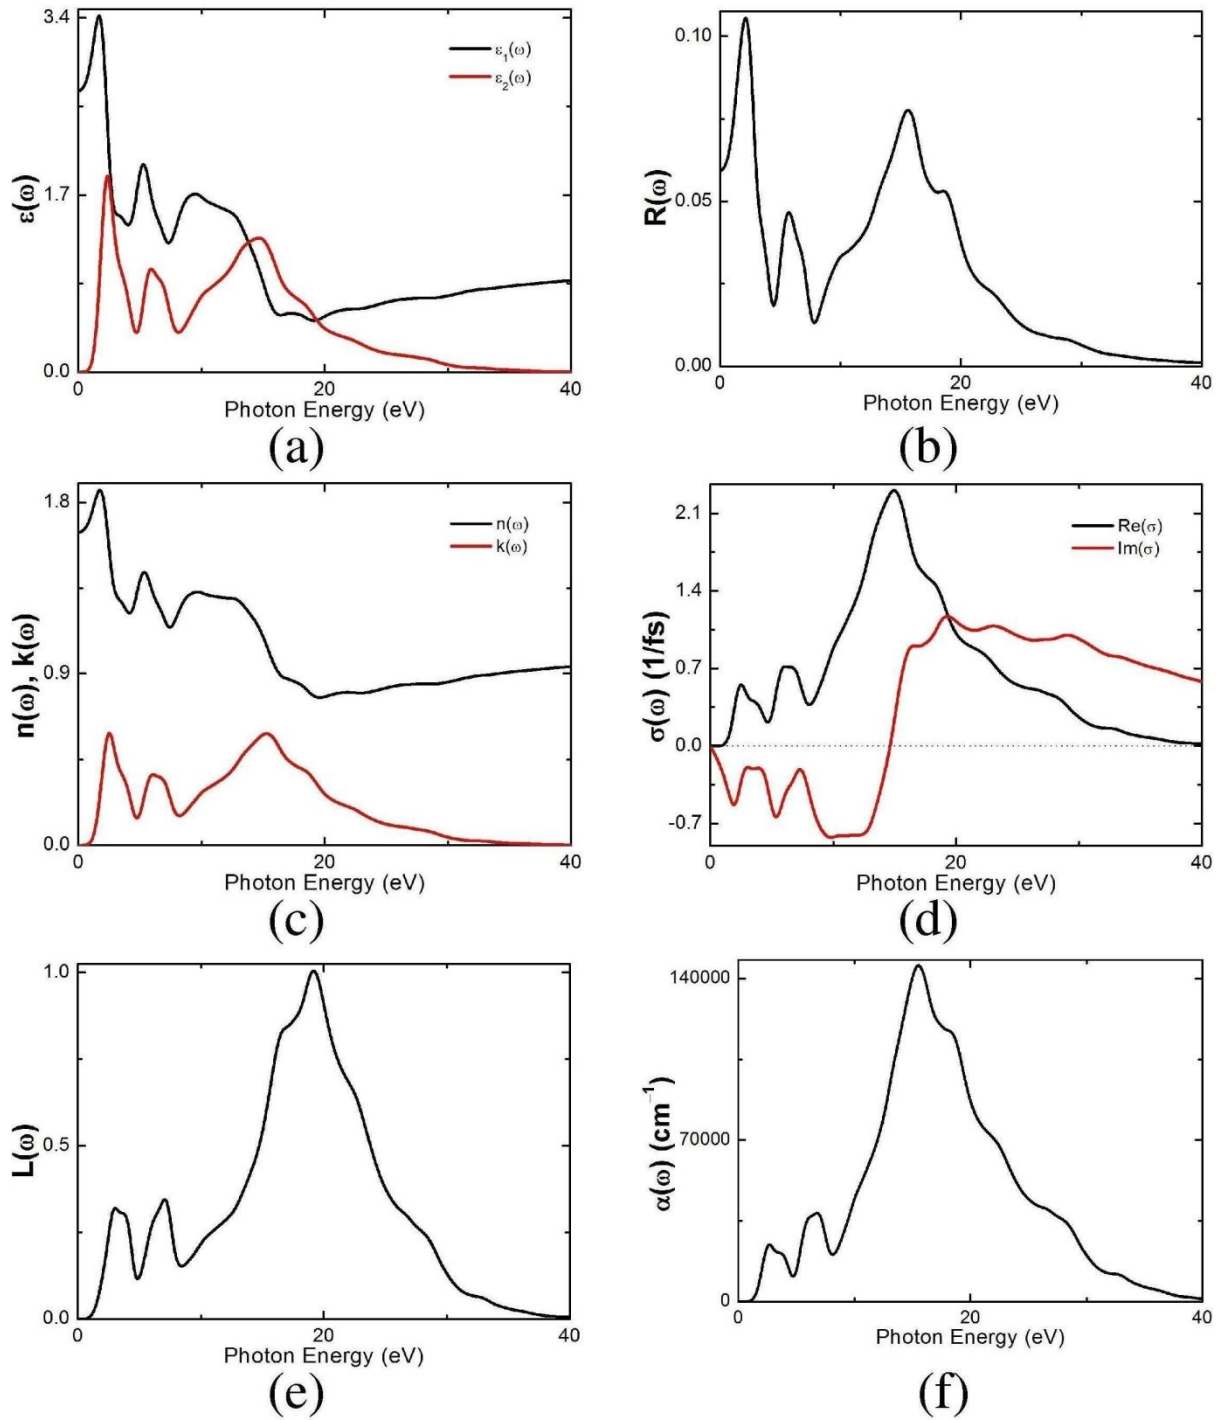

**Figure S31.** Calculated optical properties for (C, Sn): (a) dielectric function  $\epsilon(\omega)$ , (b) reflectivity  $R(\omega)$ , (c) refractive index  $n(\omega)$ ; extinction coefficient  $k(\omega)$ , (d) optical conductivity  $\sigma(\omega)$ , (e) energy loss function  $L(\omega)$ , and (f) absorption  $\alpha(\omega)$ .

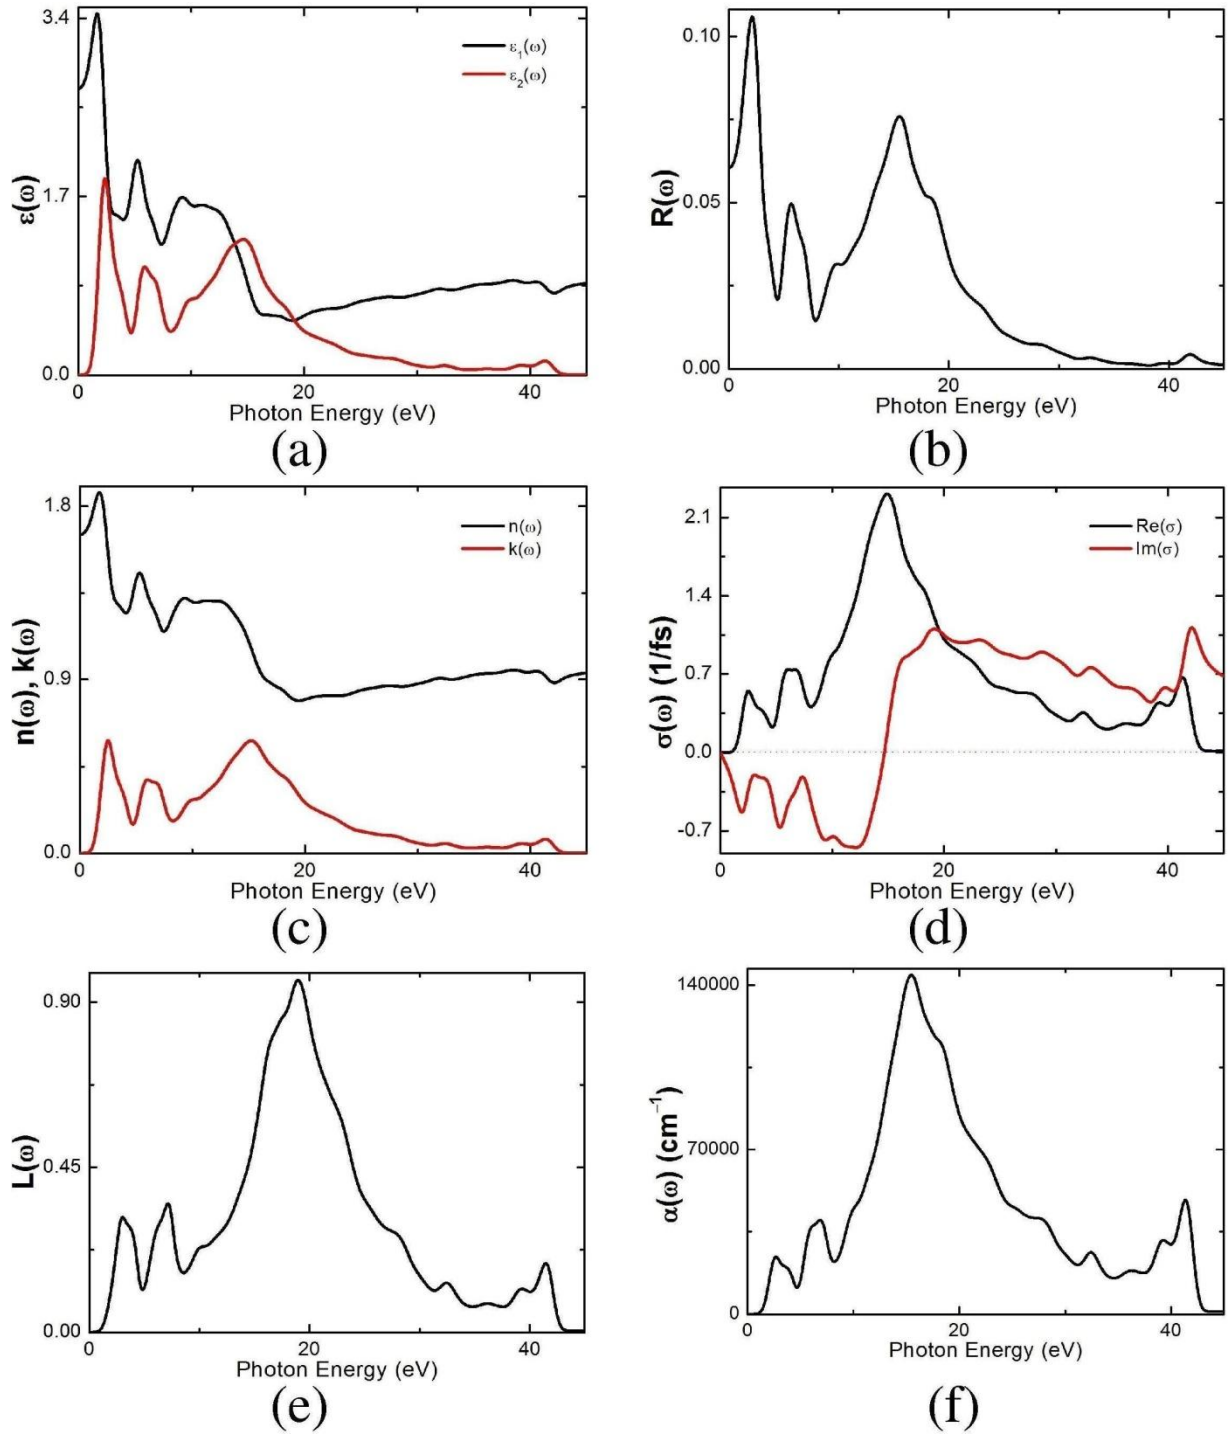

**Figure S32.** Calculated optical properties for (C, Pb): (a) dielectric function  $\epsilon(\omega)$ , (b) reflectivity  $R(\omega)$ , (c) refractive index  $\mathbf{n}(\omega)$ ; extinction coefficient  $\mathbf{k}(\omega)$ , (d) optical conductivity  $\sigma(\omega)$ , (e) energy loss function  $L(\omega)$ , and (f) absorption  $\alpha(\omega)$ .

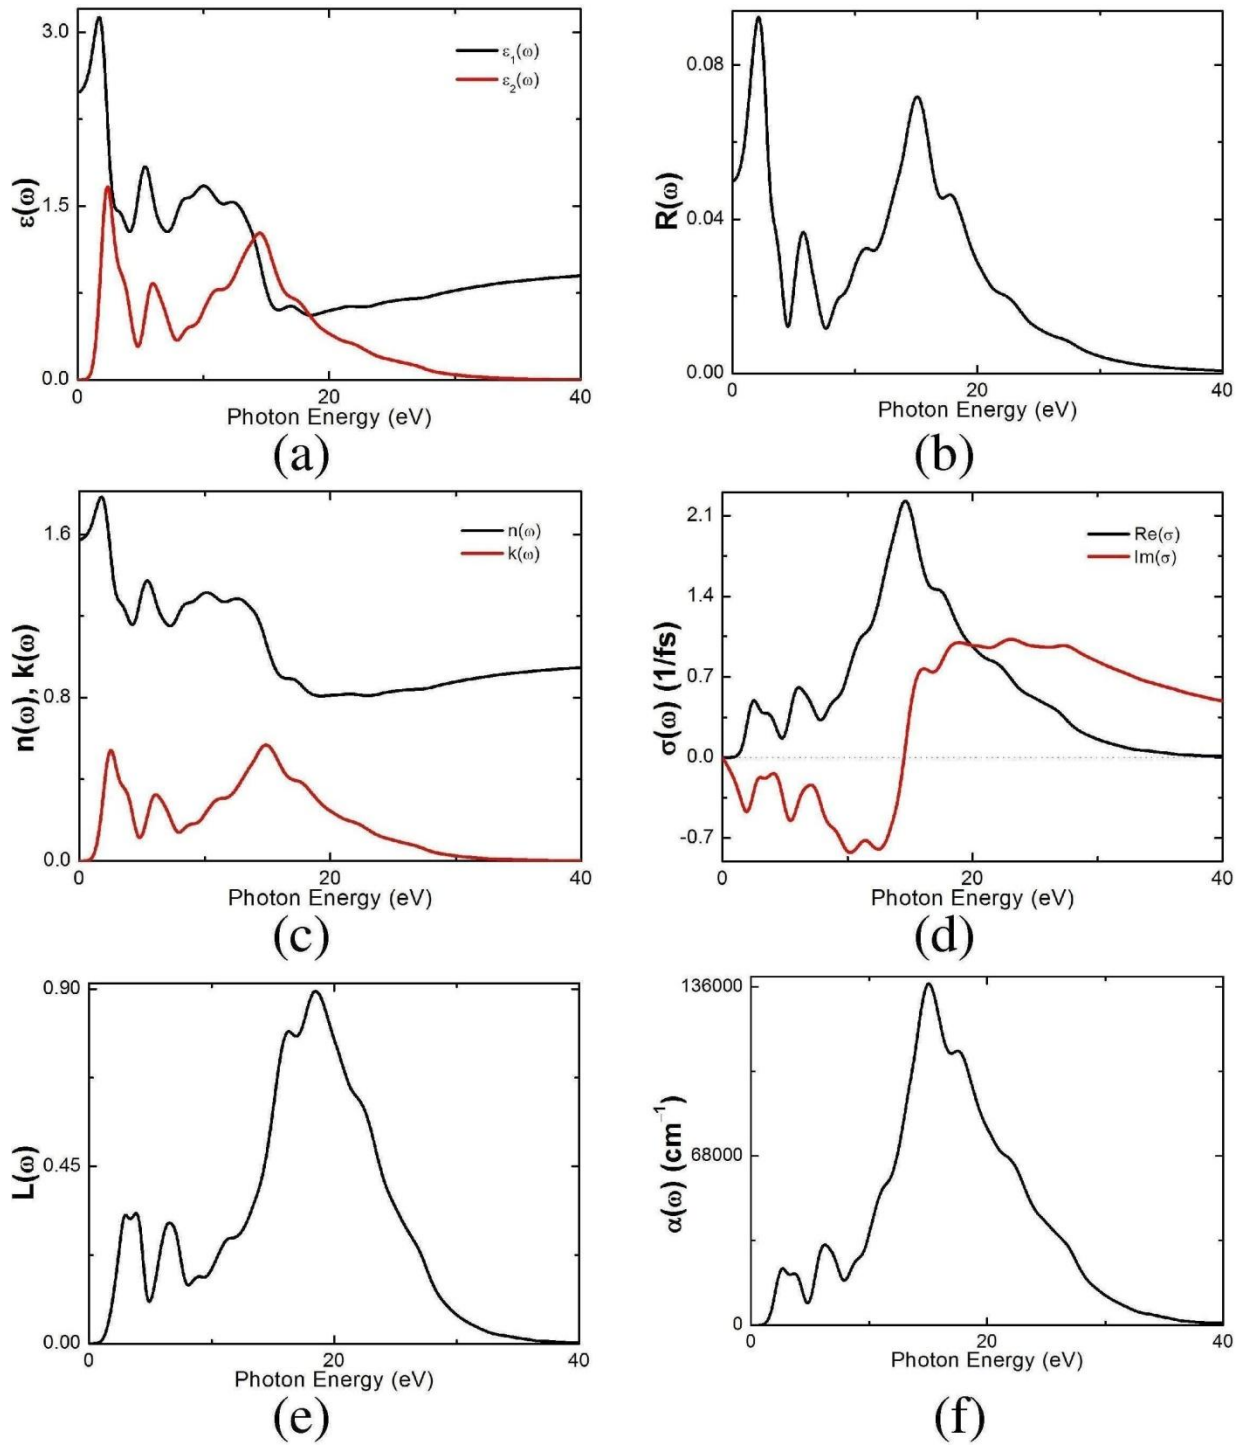

**Figure S33.** Calculated optical properties for (Si, C): (a) dielectric function  $\epsilon(\omega)$ , (b) reflectivity  $R(\omega)$ , (c) refractive index  $n(\omega)$ ; extinction coefficient  $k(\omega)$ , (d) optical conductivity  $\sigma(\omega)$ , (e) energy loss function  $L(\omega)$ , and (f) absorption  $\alpha(\omega)$ .

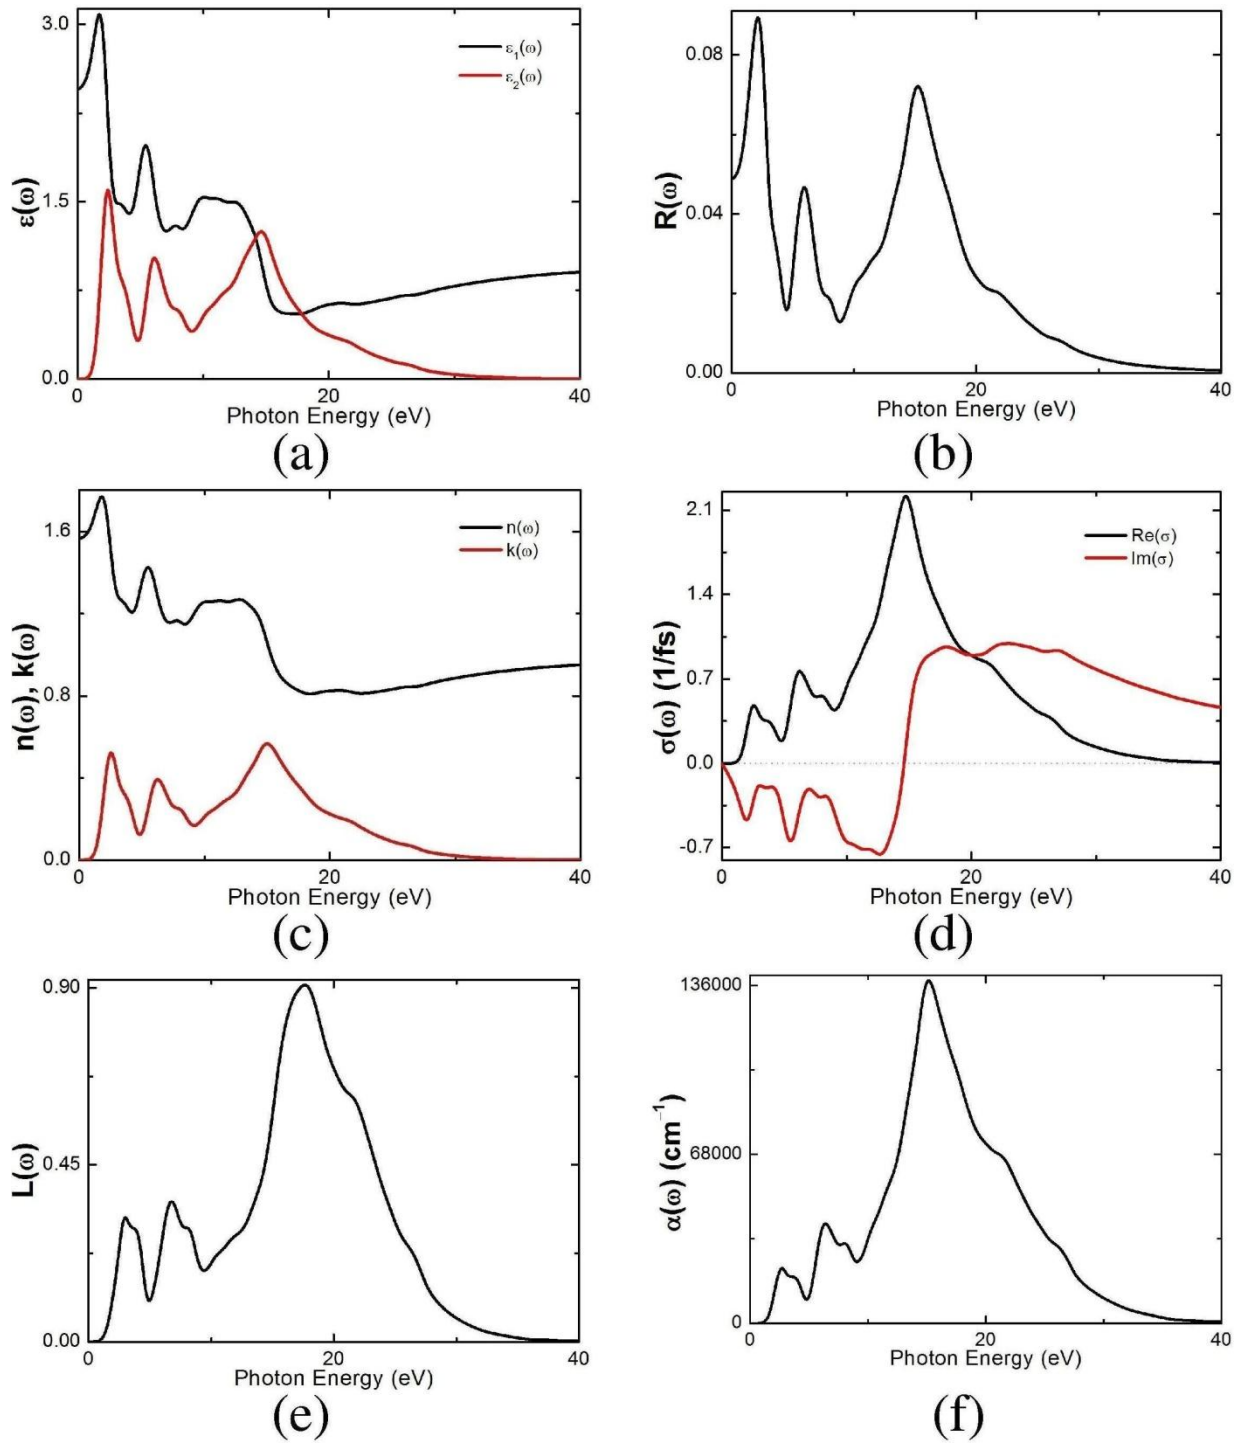

**Figure S34.** Calculated optical properties for (Si, Si): (a) dielectric function  $\epsilon(\omega)$ , (b) reflectivity  $R(\omega)$ , (c) refractive index  $n(\omega)$ ; extinction coefficient  $k(\omega)$ , (d) optical conductivity  $\sigma(\omega)$ , (e) energy loss function  $L(\omega)$ , and (f) absorption  $\alpha(\omega)$ .



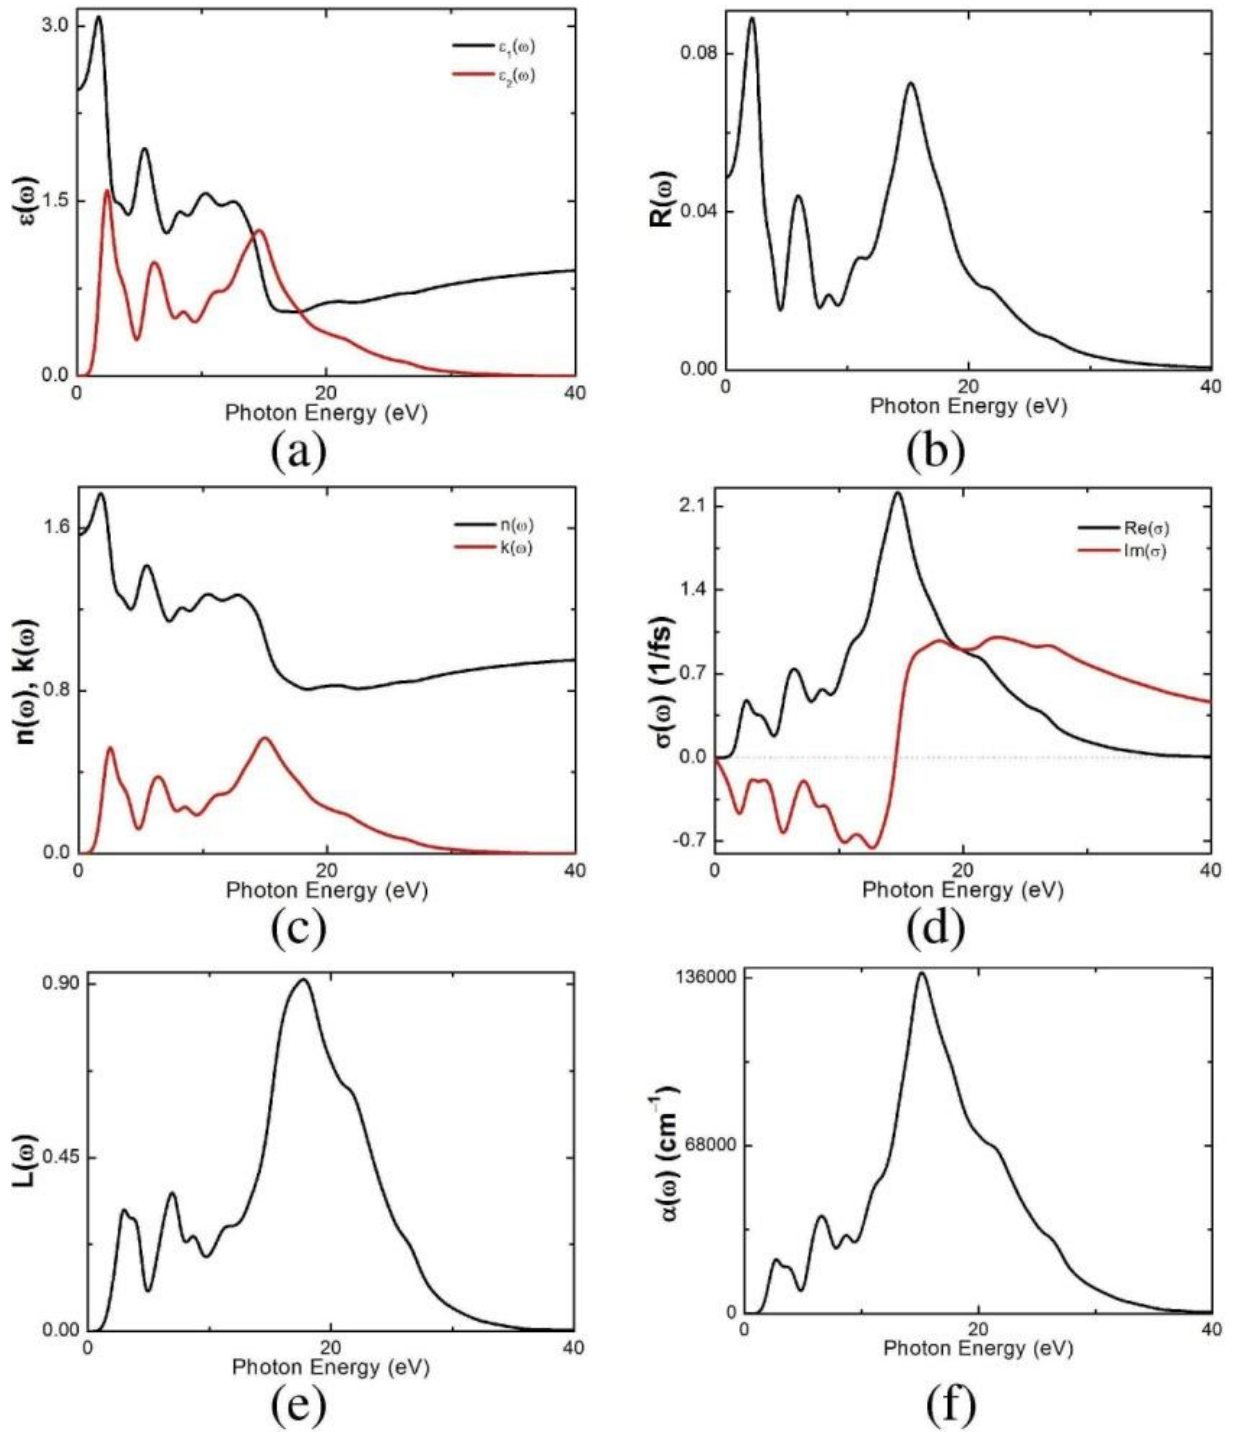

**Figure S35.** Calculated optical properties for (Si, Ge): (a) dielectric function  $\epsilon(\omega)$ , (b) reflectivity  $R(\omega)$ , (c) refractive index  $n(\omega)$ ; extinction coefficient  $k(\omega)$ , (d) optical conductivity  $\sigma(\omega)$ , (e) energy loss function  $L(\omega)$ , and (f) absorption  $\alpha(\omega)$ .

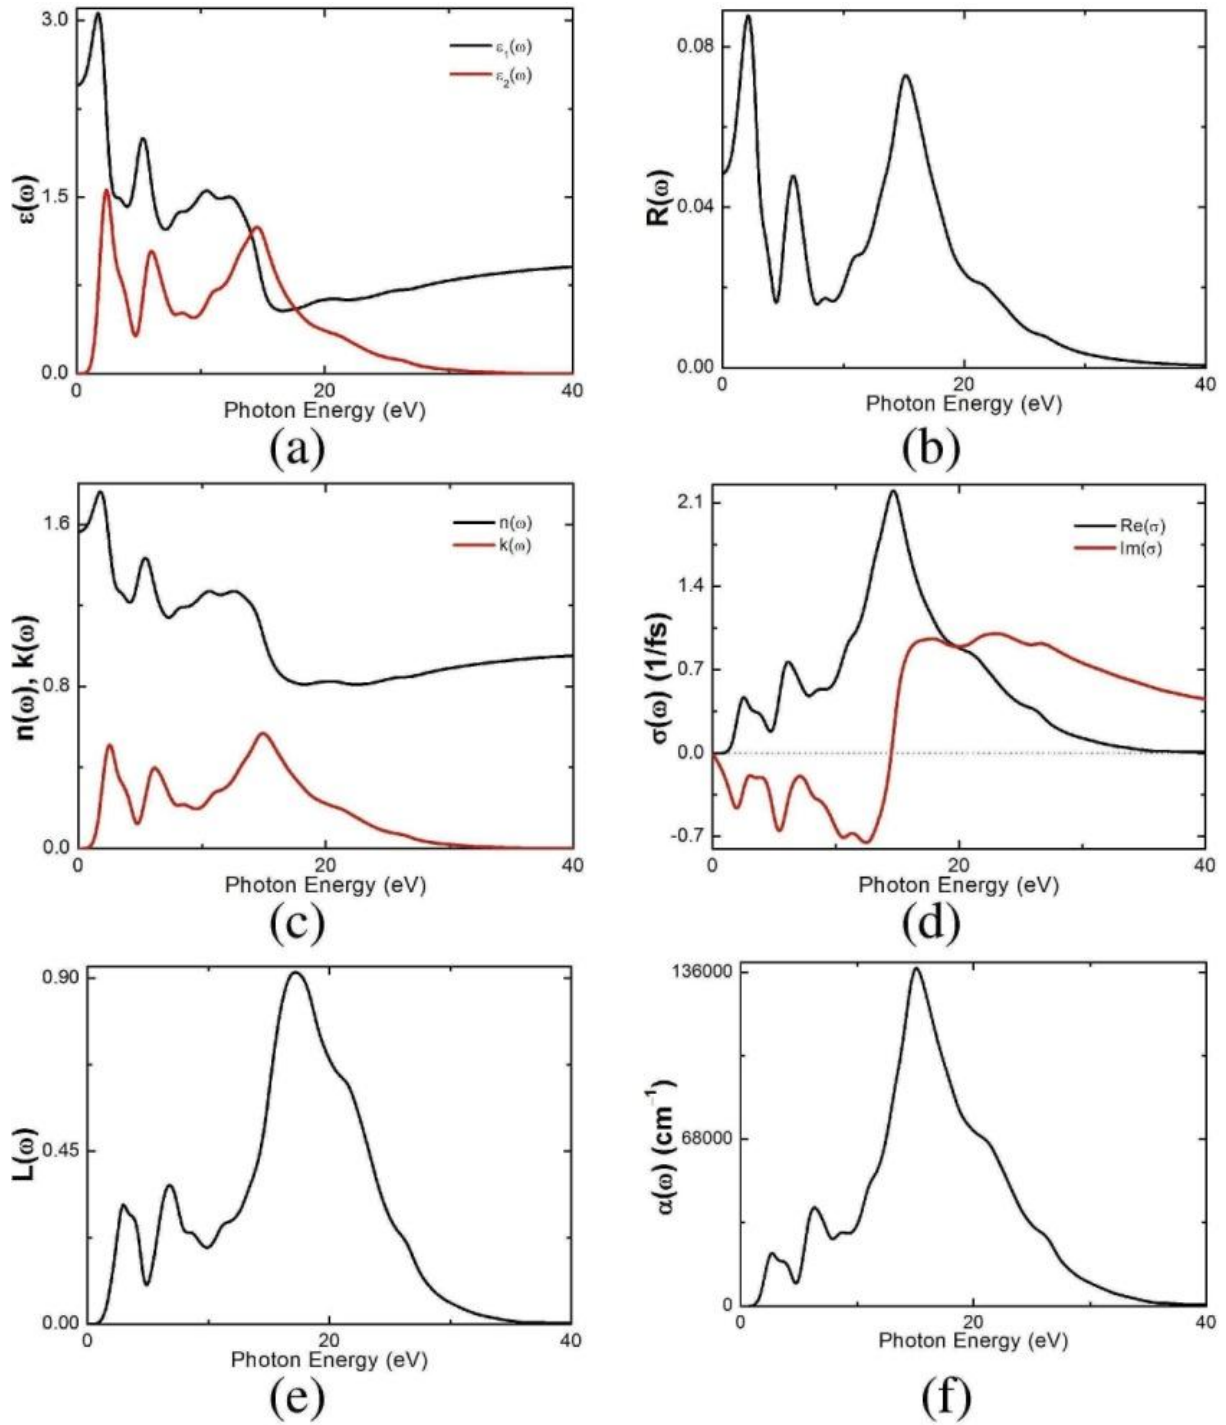

**Figure S36.** Calculated optical properties for (Si, Sn): (a) dielectric function  $\epsilon(\omega)$ , (b) reflectivity  $R(\omega)$ , (c) refractive index  $n(\omega)$ ; extinction coefficient  $k(\omega)$ , (d) optical conductivity  $\sigma(\omega)$ , (e) energy loss function  $L(\omega)$ , and (f) absorption  $\alpha(\omega)$ .



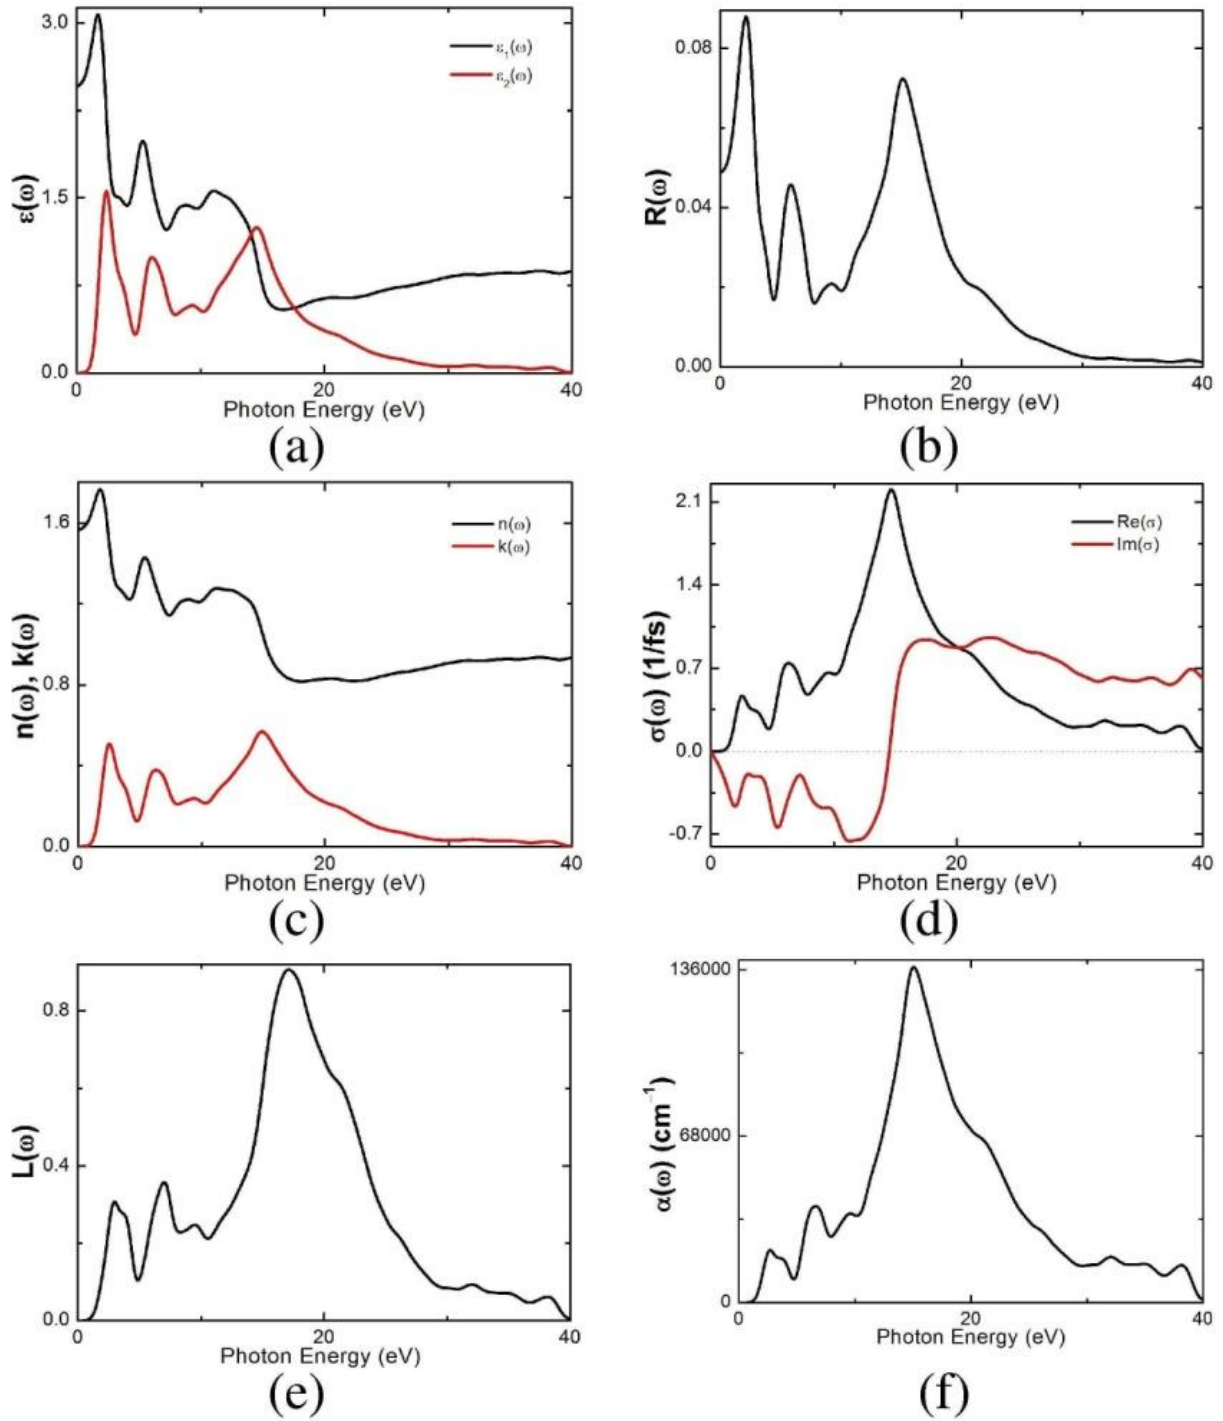

**Figure S37.** Calculated optical properties for (Si, Pb): (a) dielectric function  $\epsilon(\omega)$ , (b) reflectivity  $R(\omega)$ , (c) refractive index  $n(\omega)$ ; extinction coefficient  $k(\omega)$ , (d) optical conductivity  $\sigma(\omega)$ , (e) energy loss function  $L(\omega)$ , and (f) absorption  $\alpha(\omega)$ .

**Table S4.** Optical constants at infinite wavelength or zero energy:  $\varepsilon_1(0)$ ,  $R(0)$ ,  $n(0)$ , and the maximum peaks of imaginary part of dielectric function  $\varepsilon_2(\omega)$ , extinction coefficient  $k(\omega)$ , the real part of optical conductivity  $Re(\sigma)$ , electron energy-loss function  $L(\omega)$ , absorption coefficient  $\alpha(\omega)$  for the whole  $[(X_4Y)(O_2B-C_{12}H_6-BO_2)_3]$  ( $X=C/Si$ ;  $Y=C-Pb$ ) series as well as that of MOF-5 for a comparison.

| (X, Y)                  | (C, C)   | (C, Si)  | (C, Ge)  | (C, Sn)  | (C, Pb)  | (Si, C)  | (Si, Si) | (Si, Ge) | (Si, Sn) | (Si, Pb) | MOF-5    |
|-------------------------|----------|----------|----------|----------|----------|----------|----------|----------|----------|----------|----------|
| $\varepsilon_1(0)$      | 2.72308  | 2.7168   | 2.71297  | 2.70406  | 2.7329   | 2.48649  | 2.4559   | 2.4557   | 2.45057  | 2.4584   | 1.5286   |
| $R(0)$                  | 0.060373 | 0.059881 | 0.059881 | 0.059278 | 0.060598 | 0.049988 | 0.048926 | 0.048819 | 0.048555 | 0.048985 | 0.011244 |
| $n(0)$                  | 1.65017  | 1.64828  | 1.6471   | 1.6444   | 1.65315  | 1.57686  | 1.56714  | 1.56707  | 1.5654   | 1.5679   | 1.2364   |
| $\varepsilon_2(\omega)$ | 1.95615  | 1.9137   | 1.9042   | 1.88017  | 1.8738   | 1.6675   | 1.59662  | 1.59154  | 1.5615   | 1.5569   | 0.8023   |
| $\omega$                | 2.3977   | 2.3805   | 2.37615  | 2.35304  | 2.3437   | 2.37079  | 2.41666  | 2.41595  | 2.39718  | 2.3922   | 15.0417  |
| $k(\omega)$             | 0.60469  | 0.59518  | 0.5927   | 0.5879   | 0.5834   | 0.56839  | 0.56656  | 0.56797  | 0.5684   | 0.5675   | 0.3739   |
| $\omega$                | 2.55174  | 2.53184  | 2.52719  | 2.5026   | 2.5175   | 14.87597 | 15.0001  | 14.9957  | 14.9242  | 14.91587 | 15.2575  |
| $Re(\sigma)$            | 2.40679  | 2.3073   | 2.3279   | 2.30487  | 2.31108  | 2.2289   | 2.21378  | 2.21375  | 2.20048  | 2.20225  | 1.4635   |
| $\omega$                | 14.97803 | 14.78799 | 14.88656 | 14.9656  | 14.9061  | 14.61885 | 14.74795 | 14.7207  | 14.6741  | 14.6663  | 15.1376  |
| $L(\omega)$             | 0.96313  | 0.99048  | 1.00738  | 1.0052   | 0.96076  | 0.89498  | 0.9069   | 0.91166  | 0.9151   | 0.9061   | 0.6046   |
| $\omega$                | 19.7534  | 19.2264  | 19.3923  | 19.1781  | 18.9528  | 18.47558 | 17.65887 | 17.7453  | 17.1977  | 17.13928 | 16.4802  |
| $\alpha(\omega)$        | 149054.6 | 142761.8 | 145341.2 | 145596.4 | 144318.6 | 137225.4 | 137814.8 | 138076.7 | 137578.5 | 137208.9 | 92324.8  |
| $\omega$                | 15.3888  | 15.46888 | 15.49069 | 15.51397 | 15.4771  | 15.06296 | 15.1605  | 15.15606 | 15.0833  | 15.0747  | 15.3774  |

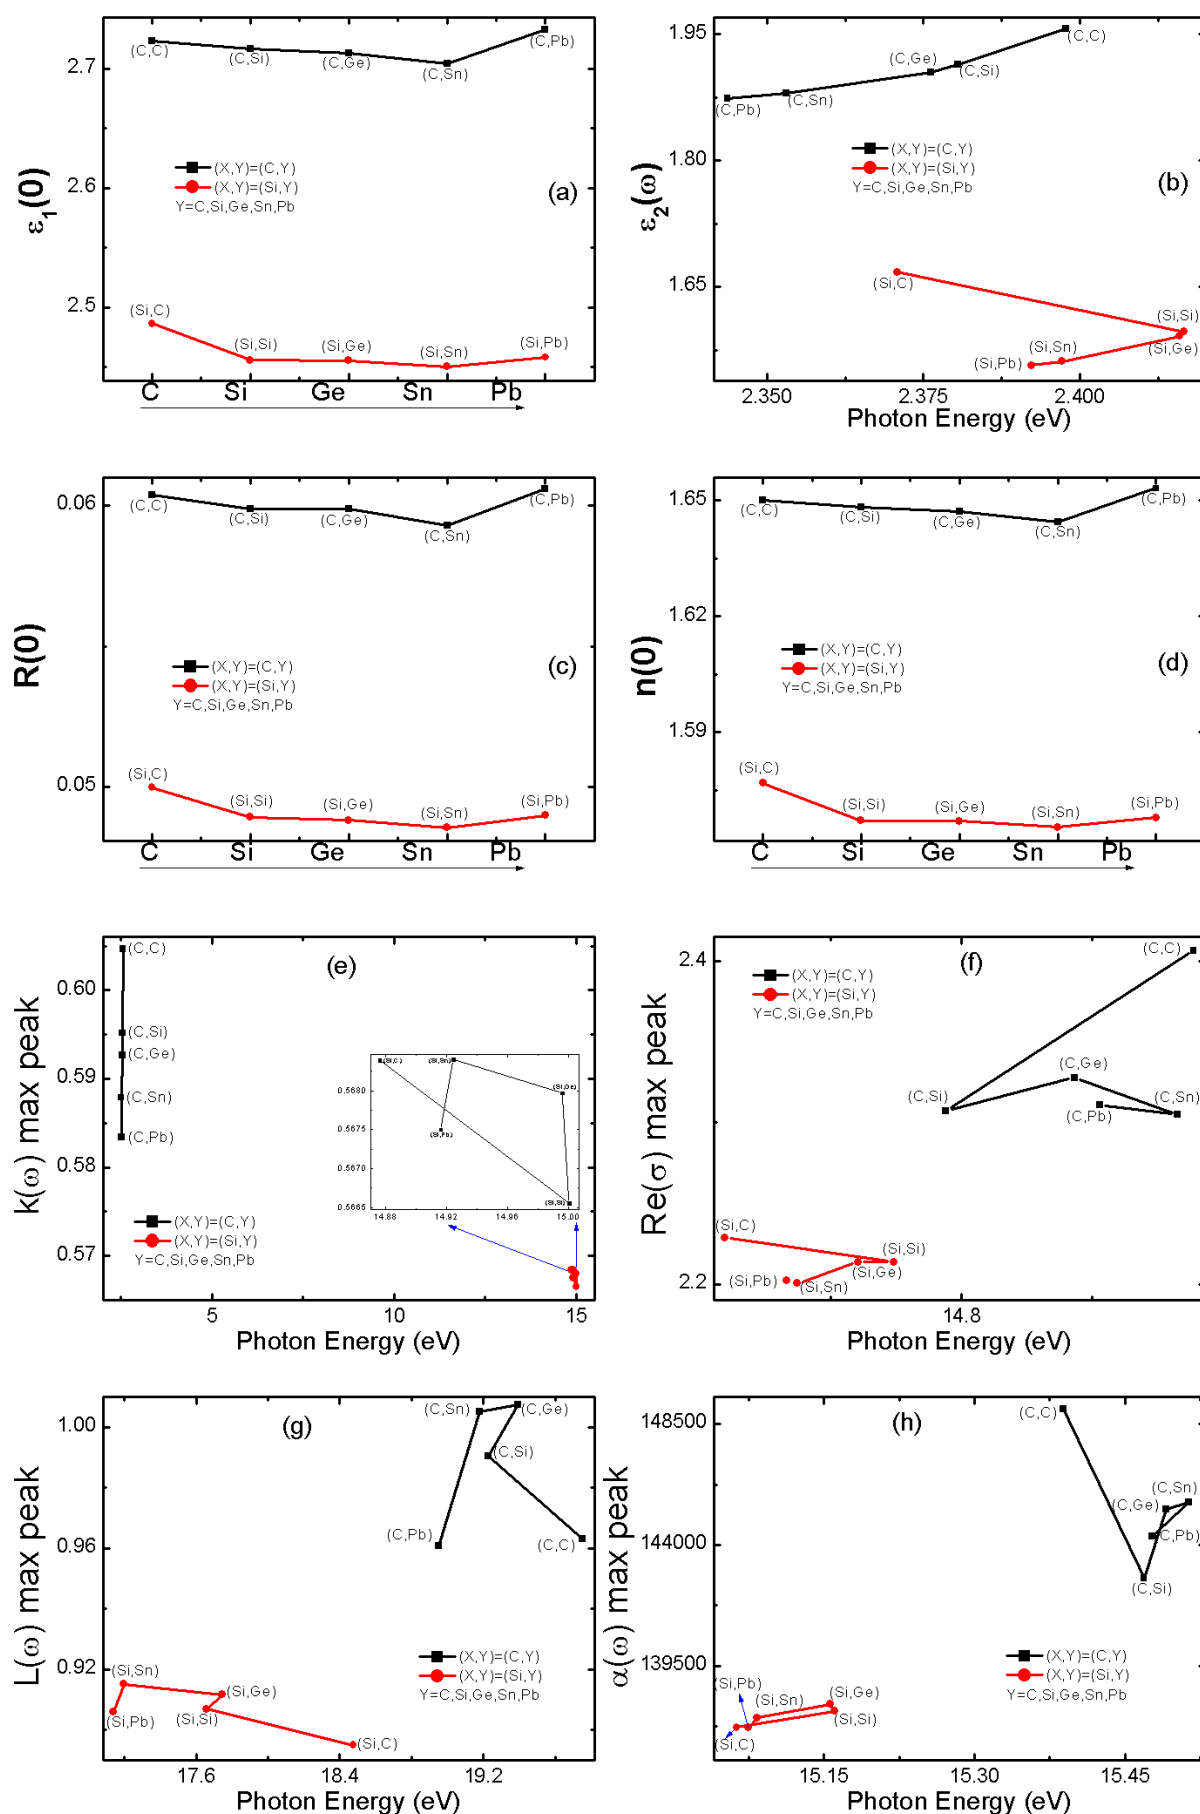

**Figure S38.** The special values of optical constants for the whole  $(X_4Y)(O_2B-C_{12}H_6-BO_2)_3$ , ( $X=C/Si$ ;  $Y=C-Pb$ ) series as well as that of MOF-5 for a comparison. we display the  $\epsilon_1(0)$ ,  $R(0)$ ,  $n(0)$  in (a), (c), (d), respectively; the maximum peak of  $\epsilon_2(\omega)$ ,  $k(\omega)$ ,  $Re(\sigma)$ ,  $L(\omega)$ , and  $\alpha(\omega)$  in (b), (e), (f), (g), and (h), respectively.

## References

- (1) Li, H.; Eddaoudi, M.; O'Keeffe, M.; Yaghi, O. M. *Nature* **1999**, *402*, 276.
- (2) Yang, L.-M.; Vajeeston, P.; Ravindran, P.; Fjellvag, H.; Tilset, M. *Inorg. Chem.* **2010**, *49*, 10283.
- (3) Yang, L.-M.; Fang, G.-Y.; Ma, J.; Ganz, E.; Han, S. S. *Cryst. Growth Des.* **2014**, *14*, 2532.
- (4) Alvaro, M.; Carbonell, E.; Ferrer, B.; Llabres i Xamena, F. X.; Garcia, H. *Chem. Eur. J.* **2007**, *13*, 5106.
- (5) Gascon, J.; Hernández-Alonso, M. D.; Almeida, A. R.; van Klink, G. P. M.; Kapteijn, F.; Mul, G. *ChemSusChem* **2008**, *1*, 981.
- (6) Bordiga, S.; Lamberti, C.; Ricchiardi, G.; Regli, L.; Bonino, F.; Damin, A.; Lillerud, K. P.; Bjorgen, M.; Zecchina, A. *Chem. Commun.* **2004**, 2300.
